# Supplementary material for: Genome-wide analysis of putative peroxiredoxin in unicellular and filamentous cyanobacteria
Source: PubMed Central journal article supplement (PMC3514251; doi:10.1186/1471-2148-12-220), 2012-11-16
Supplement: 1471-2148-12-220-S1.pdf [file 1471-2148-12-220-S1.pdf]

Additional file 1 Table S1 Cyanobacterial genes encoding peroxiredoxin were predicted by BLAST program (BLASTp and tBLASTn). Note: “-” stands for those do not belong to PRX family. The “complete” and “in complete” present for the complete or partial of the genomes (data collected at 1 Jan, 2012).

| <b>Gene No.</b>                                           | <b>Length</b> | <b>Annotation</b>               | <b>Subfamily</b> |
|-----------------------------------------------------------|---------------|---------------------------------|------------------|
| <b><i>Acaryochloris marina</i> MBIC11017 (Complete)</b>   |               |                                 |                  |
| AM1_2940                                                  | 184           | AhpC/TSA                        | Prx BCP-B        |
| AM1_1161                                                  | 156           | BCP                             | Prx BCP-A        |
| AM1_5436                                                  | 145           | BCP                             | Prx BCP-A        |
| AM1_6007                                                  | 184           | AhpC/TSA                        | Prx BCP-A        |
| AM1_2698                                                  | 202           | 2-cys Prx, putative             | Prx 2-Cys        |
| AM1_A0300                                                 | 211           | Peroxidase/ antioxidant protein | Prx 1-Cys        |
| AM1_4173                                                  | 215           | RDP, putative AhpC/TSA family   | Prx_like2-C      |
| AM1_5494                                                  | 211           | AhpC/TSA                        | Prx 1-Cys        |
| AM1_2532                                                  | 180           | AhpC/TSA family protein         | Prx_like2-B      |
| AM1_5336                                                  | 179           | RDP, putative AhpC/TSA family   | Prx_like2-A      |
| AM1_4765                                                  | 193           | RDP, putative AhpC/TSA family   | Prx_like1        |
| AM1_3680                                                  | 190           | Prx, putative                   | Prx5_like        |
| <b><i>Anabaena</i> sp. PCC 7120 (Complete)</b>            |               |                                 |                  |
| all2556                                                   | 185           | BCP                             | Prx BCP-B        |
| alr2503                                                   | 159           | BCP                             | Prx BCP-A        |
| all2375                                                   | 145           | Similar to BCP                  | Prx BCP-A        |
| alr3183                                                   | 153           | BCP                             | Prx BCP-A        |
| alr4641                                                   | 203           | Prx                             | Prx 2-Cys        |
| alr4404                                                   | 212           | AhpC/TSA family protein         | Prx 1-Cys        |
| alr4642                                                   | 213           | Putative TSAP                   | Prx_like2-D      |
| all0513                                                   | 187           | HP                              | Prx_like1        |
| alr1206                                                   | 184           | HP                              | Prx5_like        |
| <b><i>Anabaena variabilis</i> ATCC 29413 (Complete)</b>   |               |                                 |                  |
| Ava_0485                                                  | 185           | AhpC/TSA                        | Prx BCP-B        |
| Ava_0435                                                  | 159           | AhpC/TSA                        | Prx BCP-A        |
| Ava_0194                                                  | 145           | AhpC/TSA                        | Prx BCP-A        |
| Ava_3881                                                  | 153           | AhpC/TSA                        | Prx BCP-A        |
| Ava_2024                                                  | 203           | AhpC/TSA                        | Prx 2-Cys        |
| Ava_1358                                                  | 212           | 1-Cys Prx                       | Prx 1-Cys        |
| Ava_2023                                                  | 178           | Putative TSAP                   | Prx_like2-C      |
| Ava_2915                                                  | 187           | HP                              | Prx_like1        |
| Ava_0627                                                  | 184           | HP                              | Prx_like1        |
| <b><i>Arthrospira platensis</i> NIES-39 (In complete)</b> |               |                                 |                  |
| NIES39_L02380                                             | 181           | Putative BCP                    | Prx BCP-B        |
| NIES39_E01510                                             | 144           | Putative BCP                    | Prx BCP-A        |
| NIES39_O06760                                             | 155           | Putative BCP                    | Prx BCP-A        |
| NIES39_A03490                                             | 153           | BCP                             | Prx BCP-A        |
| NIES39_M00250                                             | 198           | Prx                             | Prx 2-Cys        |

|                                                         |     |                                    |             |
|---------------------------------------------------------|-----|------------------------------------|-------------|
| NIES39_E02230                                           | 377 | Probable BCP                       | Prx BCP-A   |
| NIES39_F00560                                           | 212 | Putative Prx                       | Prx 1-Cys   |
| NIES39_J00990                                           | 183 | Putative TSAP                      | Prx_like2-C |
| NIES39_Q00510                                           | 186 | HP                                 | Prx_like1   |
| NIES39_C03410                                           | 179 | HP                                 | Prx_like1   |
| NIES39_D06120                                           | 127 | Trx M                              | -           |
| <b><i>Cyanothece</i> sp. ATCC 51142 (Complete)</b>      |     |                                    |             |
| cce_1296                                                | 180 | BCP                                | Prx BCP-B   |
| cce_3358                                                | 144 | Putative BCP                       | Prx BCP-A   |
| cce_2409                                                | 199 | Trx peroxidase                     | Prx 2-Cys   |
| cce_0135                                                | 211 | Putative rehydrin                  | Prx 1-Cys   |
| cce_4124                                                | 179 | Putative TSAP                      | Prx_like2-C |
| cce_3126                                                | 190 | Prx                                | Prx5_like   |
| cce_3631                                                | 196 | HP                                 | Prx_like1   |
| <b><i>Cyanothece</i> sp. PCC 7424 (Complete)</b>        |     |                                    |             |
| PCC7424_2927                                            | 183 | AhpC/TSA                           | Prx BCP-B   |
| PCC7424_4280                                            | 157 | AhpC/TSA                           | Prx BCP-A   |
| PCC7424_3638                                            | 144 | AhpC/TSA                           | Prx BCP-A   |
| PCC7424_5046                                            | 151 | AhpC/TSA                           | Prx BCP-A   |
| PCC7424_0090                                            | 197 | AhpC/TSA                           | Prx 2-Cys   |
| PCC7424_0397                                            | 211 | Peroxidase                         | Prx 1-Cys   |
| PCC7424_1402                                            | 176 | AhpC/TSA                           | Prx_like2-B |
| PCC7424_4031                                            | 191 | AhpC/TSA                           | Prx_like1   |
| PCC7424_2508                                            | 245 | Glutaredoxin-family domain protein | Prx5_like   |
| <b><i>Cyanothece</i> sp. PCC 7425 (Complete)</b>        |     |                                    |             |
| Cyan7425_2289                                           | 183 | AhpC/TSA                           | Prx BCP-B   |
| Cyan7425_1511                                           | 161 | AhpC/TSA                           | Prx BCP-A   |
| Cyan7425_3716                                           | 153 | AhpC/TSA                           | Prx BCP-A   |
| Cyan7425_5136                                           | 149 | AhpC/TSA                           | Prx BCP-A   |
| Cyan7425_0928                                           | 198 | AhpC/TSA                           | Prx 2-Cys   |
| Cyan7425_0215                                           | 213 | Peroxidase                         | Prx 1-Cys   |
| Cyan7425_4300                                           | 185 | AhpC/TSA                           | Prx_like2-C |
| Cyan7425_0955                                           | 193 | AhpC/TSA                           | Prx_like1   |
| Cyan7425_1596                                           | 190 | Prx                                | Prx5_like   |
| <b><i>Cyanothece</i> sp. PCC 8801 (Complete)</b>        |     |                                    |             |
| PCC8801_1115                                            | 195 | AhpC/TSA                           | Prx BCP-B   |
| PCC8801_3492                                            | 167 | AhpC/TSA                           | Prx BCP-A   |
| PCC8801_1631                                            | 144 | AhpC/TSA                           | Prx BCP-A   |
| PCC8801_1491                                            | 199 | AhpC/TSA                           | Prx 2-Cys   |
| PCC8801_4218                                            | 211 | Peroxidase                         | Prx 1-Cys   |
| PCC8801_3616                                            | 178 | AhpC/TSA                           | Prx_like2-C |
| PCC8801_4240                                            | 193 | AhpC/TSA                           | Prx_like1   |
| <b><i>Gloeobacter violaceus</i> PCC 7421 (Complete)</b> |     |                                    |             |
| glr3389                                                 | 180 | BCP                                | Prx BCP-B   |

|                                                          |     |                             |             |
|----------------------------------------------------------|-----|-----------------------------|-------------|
| glr2376                                                  | 159 | probable BCP                | Prx BCP-A   |
| glr2375                                                  | 145 | probable BCP                | Prx BCP-A   |
| gll0506                                                  | 148 | BCP                         | Prx BCP-A   |
| gll3158                                                  | 184 | Probable Prx                | Prx 2-Cys   |
| glr2155                                                  | 212 | AhpC/TSA family protein     | Prx 1-Cys   |
| glr0029                                                  | 179 | HP                          | Prx_like2-B |
| glr3964                                                  | 203 | HP                          | Prx_like2-C |
| glr2108                                                  | 193 | HP                          | Prx_like1   |
| gll3157                                                  | 151 | HP                          | -           |
| <b><i>Microcystis aeruginosa</i> NIES-843 (Complete)</b> |     |                             |             |
| MAE15330                                                 | 180 | BCP                         | Prx BCP-B   |
| MAE44920                                                 | 155 | BCP homolog                 | Prx BCP-A   |
| MAE60930                                                 | 144 | BCP                         | Prx BCP-A   |
| MAE35830                                                 | 199 | Trx peroxidase              | Prx 2-Cys   |
| MAE36510                                                 | 211 | Prx                         | Prx 1-Cys   |
| MAE62780                                                 | 243 | Putative Prx                | Prx5_like   |
| MAE59730                                                 | 193 | HP                          | Prx_like1   |
| <b><i>Nostoc punctiforme</i> ATCC 29133 (Complete)</b>   |     |                             |             |
| Npun_F2425                                               | 185 | AhpC/TSA                    | Prx BCP-B   |
| Npun_R6477                                               | 159 | AhpC/TSA                    | Prx BCP-A   |
| Npun_F2872                                               | 152 | AhpC/TSA                    | Prx BCP-A   |
| Npun_R0493                                               | 145 | AhpC/TSA                    | Prx BCP-A   |
| Npun_F6082                                               | 203 | AhpC/TSA                    | Prx 2-Cys   |
| Npun_F6498                                               | 212 | AhpC/TSA                    | Prx 1-Cys   |
| Npun_F6083                                               | 178 | AhpC/TSA                    | Prx_like2-C |
| Npun_F6135                                               | 184 | AhpC/TSA                    | Prx_like1   |
| Npun_F2528                                               | 193 | AhpC/TSA                    | Prx_like1   |
| Npun_R4657                                               | 244 | Glutaredoxin family protein | Prx5_like   |
| <b><i>Prochlorococcus marinus</i> MED4 (In complete)</b> |     |                             |             |
| PMM0903                                                  | 177 | AhpC/TSA                    | Prx BCP-B   |
| PMM0079                                                  | 155 | Putative BCP                | Prx BCP-A   |
| PMM0345                                                  | 149 | Putative BCP                | Prx BCP-A   |
| PMM0856                                                  | 194 | Trx peroxidase              | Prx 2-Cys   |
| PMM0283                                                  | 197 | Conserved HP                | Prx_like1   |
| <b><i>Prochlorococcus marinus</i> MIT9312 (Complete)</b> |     |                             |             |
| PMT9312_0897                                             | 177 | AhpC/TSA                    | Prx BCP-B   |
| PMT9312_0082                                             | 155 | Putative BCP                | Prx BCP-A   |
| PMT9312_0353                                             | 149 | Putative BCP                | Prx BCP-A   |
| PMT9312_0944                                             | 194 | Trx peroxidase              | Prx 2-Cys   |
| <b><i>Prochlorococcus marinus</i> MIT9313 (Complete)</b> |     |                             |             |
| PMT1012                                                  | 187 | AhpC/TSA                    | Prx BCP-B   |
| PMT1622                                                  | 155 | Putative BCP                | Prx BCP-A   |
| PMT0387                                                  | 153 | Putative BCP                | Prx BCP-A   |
| PMT0754                                                  | 200 | Trx peroxidase              | Prx 2-Cys   |

|                                                                   |     |                       |           |
|-------------------------------------------------------------------|-----|-----------------------|-----------|
| PMT1186                                                           | 190 | AhpC/TSA              | Prx5_like |
| <b><i>Prochlorococcus marinus</i> SS120 (Complete)</b>            |     |                       |           |
| Pro0932                                                           | 183 | Prx                   | Prx BCP-B |
| Pro0093                                                           | 155 | Prx                   | Prx BCP-A |
| Pro0978                                                           | 197 | Prx, AhpC/TSA family  | Prx 2-Cys |
| <b><i>Prochlorococcus marinus</i> str. AS9601 (Complete)</b>      |     |                       |           |
| A9601_09581                                                       | 177 | AhpC/TSA              | Prx BCP-B |
| A9601_00921                                                       | 155 | Putative BCP          | Prx BCP-A |
| A9601_03811                                                       | 149 | Putative BCP          | Prx BCP-A |
| A9601_10131                                                       | 194 | Trx peroxidase        | Prx 2-Cys |
| <b><i>Prochlorococcus marinus</i> str. MIT 9211 (In complete)</b> |     |                       |           |
| P9211_08571                                                       | 183 | AhpC/TSA              | Prx BCP-B |
| P9211_15101                                                       | 150 | Prx                   | Prx BCP-A |
| P9211_00881                                                       | 158 | Putative BCP          | Prx BCP-A |
| P9211_09041                                                       | 199 | Trx peroxidase        | Prx 2-Cys |
| <b><i>Prochlorococcus marinus</i> str. MIT 9215 (In complete)</b> |     |                       |           |
| P9215_09891                                                       | 177 | AhpC/TSA              | Prx BCP-B |
| P9215_00921                                                       | 155 | Putative BCP          | Prx BCP-A |
| P9215_03801                                                       | 149 | Putative BCP          | Prx BCP-A |
| P9215_10441                                                       | 194 | Trx peroxidase        | Prx 2-Cys |
| P9215_03081                                                       | 197 | HP                    | Prx_like1 |
| P9215_11961                                                       | 107 | Trx                   | -         |
| <b><i>Prochlorococcus marinus</i> str. MIT 9301 (In complete)</b> |     |                       |           |
| P9301_09561                                                       | 177 | AhpC/TSA              | Prx BCP-B |
| P9301_00911                                                       | 155 | Putative BCP          | Prx BCP-A |
| P9301_03801                                                       | 149 | Putative BCP          | Prx BCP-A |
| P9301_10121                                                       | 194 | Trx peroxidase        | Prx 2-Cys |
| P9301_02651                                                       | 153 | Trx-like protein Tx1A | -         |
| <b><i>Prochlorococcus marinus</i> str. MIT 9303 (Complete)</b>    |     |                       |           |
| P9303_10801                                                       | 173 | AhpC/TSA              | Prx BCP-B |
| P9303_02611                                                       | 155 | Putative BCP          | Prx BCP-A |
| P9303_19011                                                       | 153 | Putative BCP          | Prx BCP-A |
| P9303_14621                                                       | 200 | Trx peroxidase        | Prx 2-Cys |
| P9303_08311                                                       | 190 | Prx                   | Prx5_like |
| P9303_25151                                                       | 221 | HP                    | Prx_like1 |
| <b><i>Prochlorococcus marinus</i> str. MIT 9515 (In complete)</b> |     |                       |           |
| P9515_09851                                                       | 177 | AhpC/TSA              | Prx BCP-B |
| P9515_00891                                                       | 155 | Putative BCP          | Prx BCP-A |
| P9515_03821                                                       | 149 | Putative BCP          | Prx BCP-A |
| P9515_09331                                                       | 194 | Trx peroxidase        | Prx 2-Cys |
| <b><i>Prochlorococcus marinus</i> str. NATL1A (Complete)</b>      |     |                       |           |
| NATL1_09761                                                       | 184 | AhpC/TSA              | Prx BCP-B |
| NATL1_15651                                                       | 149 | Prx                   | Prx BCP-A |

|                                                              |     |                                     |           |
|--------------------------------------------------------------|-----|-------------------------------------|-----------|
| NATL1_16391                                                  | 151 | Prx                                 | Prx BCP-A |
| NATL1_01441                                                  | 155 | Putative BCP                        | Prx BCP-A |
| NATL1_10331                                                  | 198 | Trx peroxidase                      | Prx 2-Cys |
| NATL1_03631                                                  | 206 | HP                                  | Prx_like1 |
| <b><i>Prochlorococcus marinus</i> str. NATL2A (Complete)</b> |     |                                     |           |
| PMN2A_0304                                                   | 184 | AhpC/TSA                            | Prx BCP-B |
| PMN2A_0727                                                   | 149 | Putative BCP                        | Prx BCP-A |
| PMN2A_0787                                                   | 151 | Putative BCP                        | Prx BCP-A |
| PMN2A_1443                                                   | 155 | Putative BCP                        | Prx BCP-A |
| PMN2A_0352                                                   | 198 | Trx peroxidase                      | Prx 2-Cys |
| PMN2A_1649                                                   | 206 | HP                                  | Prx_like1 |
| <b><i>Synechococcus elongatus</i> PCC 6301 (Complete)</b>    |     |                                     |           |
| syc0883_d                                                    | 181 | BCP                                 | Prx BCP-B |
| syc2152_c                                                    | 150 | BCP                                 | Prx BCP-A |
| syc2287_c                                                    | 157 | BCP                                 | Prx BCP-A |
| syc1915_d                                                    | 145 | BCP                                 | Prx BCP-A |
| syc1793_d                                                    | 201 | Trx peroxidase                      | Prx 2-Cys |
| syc1657_c                                                    | 211 | Antioxidant protein] rehydrin       | Prx 1-Cys |
| syc2361_c                                                    | 195 | HP                                  | Prx_like1 |
| <b><i>Synechococcus elongatus</i> PCC 7942 (Complete)</b>    |     |                                     |           |
| Synpcc7942_0642                                              | 181 | BCP                                 | Prx BCP-B |
| Synpcc7942_1942                                              | 150 | BCP                                 | Prx BCP-A |
| Synpcc7942_1806                                              | 157 | BCP                                 | Prx BCP-A |
| Synpcc7942_2180                                              | 145 | BCP                                 | Prx BCP-A |
| Synpcc7942_2309                                              | 198 | Trx peroxidase                      | Prx 2-Cys |
| Synpcc7942_2449                                              | 211 | 1-Cys Prx                           | Prx 1-Cys |
| Synpcc7942_1730                                              | 196 | HP                                  | Prx_like1 |
| <b><i>Synechococcus</i> sp. CC9311 (Complete)</b>            |     |                                     |           |
| sync_1400                                                    | 183 | AhpC/TSA                            | Prx BCP-B |
| sync_2508                                                    | 155 | BCP                                 | Prx BCP-A |
| sync_1556                                                    | 152 | BCP                                 | Prx BCP-A |
| sync_1322                                                    | 192 | Trx peroxidase                      | Prx 2-Cys |
| sync_0254                                                    | 209 | Trx family protein                  | Prx_like1 |
| sync_0689                                                    | 192 | Prx 2 family protein                | Prx5_like |
| <b><i>Synechococcus</i> sp. CC9605 (Complete)</b>            |     |                                     |           |
| Syncc9605_1406                                               | 186 | Twin-arginine translocation pathway | Prx BCP-B |
| Syncc9605_1141                                               | 151 | Putative BCP                        | Prx BCP-A |
| Syncc9605_2307                                               | 155 | Putative BCP                        | Prx BCP-A |
| Syncc9605_1324                                               | 200 | Trx peroxidase                      | Prx 2-Cys |
| Syncc9605_0215                                               | 194 | Conserved HP                        | Prx_like1 |
| Syncc9605_1945                                               | 124 | Trx                                 | -         |
| <b><i>Synechococcus</i> sp. CC9902 (Complete)</b>            |     |                                     |           |
| Syncc9902_1080                                               | 186 | AhpC/TSA                            | Prx BCP-B |

|                                                            |     |                               |             |
|------------------------------------------------------------|-----|-------------------------------|-------------|
| Syncc9902_1316                                             | 151 | Putative BCP                  | Prx BCP-A   |
| Syncc9902_0386                                             | 155 | Putative BCP                  | Prx BCP-A   |
| Syncc9902_1150                                             | 203 | Trx peroxidase                | Prx 2-Cys   |
| Syncc9902_0982                                             | 175 | Putative superoxide dismutase | -           |
| Syncc9902_0354                                             | 309 | Trx domain 2                  | -           |
| Syncc9902_0242                                             | 222 | Conesrved HP                  | Prx_like1   |
| Syncc9902_0720                                             | 107 | Trx                           | -           |
| <b><i>Synechococcus</i> sp. JA-2-3B'a(2-13) (Complete)</b> |     |                               |             |
| CYB_2186                                                   | 173 | Putative Prx                  | Prx BCP-B   |
| CYB_0523                                                   | 154 | BCP                           | Prx BCP-A   |
| CYB_1057                                                   | 145 | Antioxidant, AhpC/Tsa family  | Prx BCP-A   |
| CYB_1376                                                   | 155 | Antioxidant, AhpC/Tsa family  | Prx BCP-A   |
| CYB_2254                                                   | 202 | Antioxidant, AhpC/Tsa family  | Prx 2-Cys   |
| CYB_0113                                                   | 216 | Antioxidant, AhpC/Tsa family  | Prx 1-Cys   |
| CYB_0140                                                   | 193 | AhpC/TSA family protein       | Prx_like2-B |
| CYB_2461                                                   | 206 | HP                            | Prx_like1   |
| <b><i>Synechococcus</i> sp. JA-3-3Ab (Complete)</b>        |     |                               |             |
| CYA_0907                                                   | 177 | Antioxidant, AhpC/Tsa family  | Prx BCP-B   |
| CYA_2145                                                   | 154 | BCP                           | Prx BCP-A   |
| CYA_0672                                                   | 145 | Antioxidant, AhpC/Tsa family  | Prx BCP-A   |
| CYA_2305                                                   | 155 | Antioxidant, AhpC/TSA family  | Prx BCP-A   |
| CYA_0537                                                   | 202 | Antioxidant, AhpC/Tsa family  | Prx 2-Cys   |
| CYA_2849                                                   | 216 | Antioxidant, AhpC/Tsa family  | Prx 1-Cys   |
| CYA_1949                                                   | 193 | AhpC/TSA family protein       | Prx_like2-B |
| CYA_2781                                                   | 196 | HP                            | Prx_like1   |
| <b><i>Synechococcus</i> sp. PCC 7002 (Complete)</b>        |     |                               |             |
| SYNPCC7002_A0109                                           | 192 | AhpC/TSA                      | Prx BCP-B   |
| SYNPCC7002_A1108                                           | 154 | BCP                           | Prx BCP-A   |
| SYNPCC7002_A0558                                           | 195 | AhpC/TSA                      | Prx 2-Cys   |
| SYNPCC7002_A0320                                           | 211 | AhpC/TSA family               | Prx 1-Cys   |
| SYNPCC7002_A1383                                           | 193 | Prx                           | Prx_like1   |
| SYNPCC7002_A0793                                           | 187 | AhpC/TSA family protein       | Prx5_like   |
| <b><i>Synechococcus</i> sp. RCC307 (Complete)</b>          |     |                               |             |
| SynRCC307_1384                                             | 181 | Prx                           | Prx BCP-B   |
| SynRCC307_0392                                             | 156 | Prx                           | Prx BCP-A   |
| SynRCC307_1342                                             | 151 | Prx                           | Prx BCP-A   |
| SynRCC307_1238                                             | 199 | Prx, AhpC/TSA family          | Prx 2-Cys   |
| SynRCC307_0386                                             | 223 | Prx                           | Prx 1-Cys   |
| SynRCC307_2285                                             | 182 | Possible Trx                  | Prx_like1   |
| <b><i>Synechococcus</i> sp. WH 7803 (Complete)</b>         |     |                               |             |
| SynWH7803_1236                                             | 183 | Prx                           | Prx BCP-B   |
| SynWH7803_1042                                             | 152 | Prx                           | Prx BCP-A   |
| SynWH7803_2172                                             | 157 | Prx                           | Prx BCP-A   |
| SynWH7803_1118                                             | 200 | Prx, AhpC/TSA family          | Prx 2-Cys   |

| <b><i>Synechococcus</i> sp. WH8102 (Complete)</b>           |     |                         |             |
|-------------------------------------------------------------|-----|-------------------------|-------------|
| SYNW1280                                                    | 186 | AhpC/TSA                | Prx BCP-B   |
| SYNW1015                                                    | 151 | Putative BCP            | Prx BCP-A   |
| SYNW2162                                                    | 155 | Putative BCP            | Prx BCP-A   |
| SYNW1213                                                    | 200 | Trx peroxidase          | Prx 2-Cys   |
| SYNW0221                                                    | 194 | Conserved HP            | Prx_like1   |
| SYNW0724                                                    | 107 | Trx                     | -           |
| <b><i>Synechocystis</i> sp. PCC 6803 (Complete)</b>         |     |                         |             |
| sll0221                                                     | 184 | BCP                     | Prx BCP-B   |
| slr0242                                                     | 160 | BCP homolog             | Prx BCP-A   |
| sll0755                                                     | 200 | Trx peroxidase          | Prx 2-Cys   |
| slr1198                                                     | 211 | Antioxidant protein     | Prx 1-Cys   |
| sll1159                                                     | 218 | probable BCP            | Prx_like2-C |
| sll1621                                                     | 189 | AhpC/TSA family protein | Prx5_like   |
| <b><i>Trichodesmium erythraeum</i> IMS101 (Complete)</b>    |     |                         |             |
| Tery_2703                                                   | 183 | Redoxin                 | Prx BCP-B   |
| Tery_3959                                                   | 146 | Redoxin                 | Prx BCP-A   |
| Tery_3182                                                   | 154 | Redoxin                 | Prx BCP-A   |
| Tery_0235                                                   | 199 | AhpC/TSA                | Prx 2-Cys   |
| Tery_5038                                                   | 212 | 1-Cys Prx               | Prx 1-Cys   |
| Tery_0234                                                   | 183 | Redoxin                 | Prx_like2-C |
| Tery_3842                                                   | 193 | Redoxin                 | Prx_like1   |
| Tery_0162                                                   | 189 | Redoxin                 | Prx5_like   |
| <b><i>Thermosynechococcus elongatus</i> BP-1 (Complete)</b> |     |                         |             |
| tlr1194                                                     | 179 | BCP                     | Prx BCP-B   |
| tll1451                                                     | 156 | BCP homolog             | Prx BCP-A   |
| tlr1198                                                     | 145 | BCP                     | Prx BCP-A   |
| tll1454                                                     | 197 | Trx peroxidase          | Prx 2-Cys   |
| tlr2261                                                     | 211 | AhpC/TSA family protein | Prx 1-Cys   |
| tsr0473                                                     | 76  | Probable BCP            | -           |
| tlr1289                                                     | 196 | HP                      | Prx_like2-C |
| tlr1788                                                     | 193 | HP                      | Prx_like1   |

Additional file 1 Table S2 Cyanobacterial genes encoding peroxiredoxin were predicted by hidden Markov model (hmmsearch). Note: “\*” stands for additional genes encoding PRXs predicted based on hmmsearch analysis. The “complete” and “in complete” present for the complete or partial of the genomes (data collected at 1 Jan, 2012).

| Full sequence                                                | Best 1 domain | Dom | E-value | score | bias | E-value | score | bias          | exp                                                               | N | Sequence | Description |
|--------------------------------------------------------------|---------------|-----|---------|-------|------|---------|-------|---------------|-------------------------------------------------------------------|---|----------|-------------|
| <b><i>Prochlorococcus marinus</i> str. NATL1A (Complete)</b> |               |     |         |       |      |         |       |               |                                                                   |   |          |             |
| 2.3e-40                                                      | 134.4         | 0.0 | 3.3e-40 | 133.9 | 0.0  | 1.2     | 1     | NATL1_10331   | thioredoxin peroxidase                                            |   |          |             |
| 5.2e-37                                                      | 123.6         | 0.0 | 5.9e-37 | 123.4 | 0.0  | 1.0     | 1     | NATL1_16391   | Peroxiredoxin                                                     |   |          |             |
| 6.5e-36                                                      | 120.0         | 0.0 | 7.7e-36 | 119.8 | 0.0  | 1.1     | 1     | NATL1_01441   | putative bacterioferritin comigratory (BCP) protein               |   |          |             |
| 1.5e-35                                                      | 118.8         | 0.0 | 1.9e-35 | 118.5 | 0.0  | 1.1     | 1     | NATL1_09761   | Alkyl hydroperoxide reductase/ Thiol specific antioxidant protein |   |          |             |
| 7.5e-33                                                      | 110.1         | 0.0 | 8.8e-33 | 109.9 | 0.0  | 1.1     | 1     | NATL1_15651   | Peroxiredoxin                                                     |   |          |             |
| <b><i>Prochlorococcus marinus</i> str. NATL2A (Complete)</b> |               |     |         |       |      |         |       |               |                                                                   |   |          |             |
| 2.3e-40                                                      | 134.4         | 0.0 | 3.3e-40 | 133.9 | 0.0  | 1.2     | 1     | PMN2A_0352    | thioredoxin peroxidase                                            |   |          |             |
| 5.1e-37                                                      | 123.6         | 0.0 | 5.9e-37 | 123.4 | 0.0  | 1.0     | 1     | PMN2A_0787    | putative bacterioferritin comigratory protein                     |   |          |             |
| 8.7e-37                                                      | 122.8         | 0.0 | 1e-36   | 122.6 | 0.0  | 1.1     | 1     | PMN2A_1443    | putative bacterioferritin comigratory (BCP) protein               |   |          |             |
| 6e-35                                                        | 116.9         | 0.0 | 7.5e-35 | 116.6 | 0.0  | 1.1     | 1     | PMN2A_0304    | alkyl hydroperoxide reductase/thiol specific antioxidant protein  |   |          |             |
| 7e-33                                                        | 110.2         | 0.0 | 8.1e-33 | 110.0 | 0.0  | 1.1     | 1     | PMN2A_0727    | putative bacterioferritin comigratory protein                     |   |          |             |
| <b><i>Synechococcus</i> sp. JA-2-3B'a(2-13) (Complete)</b>   |               |     |         |       |      |         |       |               |                                                                   |   |          |             |
| 4e-46                                                        | 153.4         | 0.0 | 4.7e-46 | 153.2 | 0.0  | 1.0     | 1     | CYB_0523      | bacterioferritin comigratory protein                              |   |          |             |
| 3.7e-44                                                      | 147.0         | 0.0 | 5.3e-44 | 146.5 | 0.0  | 1.2     | 1     | CYB_2254      | antioxidant, AhpC/Tsa family                                      |   |          |             |
| 1.6e-42                                                      | 141.7         | 0.0 | 1.9e-42 | 141.5 | 0.0  | 1.1     | 1     | CYB_2186      | putative peroxiredoxin                                            |   |          |             |
| 1.5e-41                                                      | 138.6         | 0.0 | 1.8e-41 | 138.4 | 0.0  | 1.0     | 1     | CYB_1057      | antioxidant, AhpC/Tsa family                                      |   |          |             |
| 2.8e-37                                                      | 124.8         | 0.0 | 3.3e-37 | 124.6 | 0.0  | 1.0     | 1     | CYB_1376      | antioxidant, AhpC/TSA family                                      |   |          |             |
| 4e-36                                                        | 121.1         | 0.0 | 5.5e-36 | 120.6 | 0.0  | 1.2     | 1     | CYB_0113      | antioxidant, AhpC/Tsa family                                      |   |          |             |
| 7.3e-34                                                      | 113.8         | 0.0 | 9.1e-34 | 113.5 | 0.0  | 1.1     | 1     | CYB_0140      | AhpC/TSA family protein                                           |   |          |             |
| 6.9e-27                                                      | 91.2          | 0.0 | 9.1e-27 | 90.8  | 0.0  | 1.2     | 1     | CYB_2461      | hypothetical protein                                              |   |          |             |
| <b><i>Synechococcus</i> sp. JA-3-3Ab (Complete)</b>          |               |     |         |       |      |         |       |               |                                                                   |   |          |             |
| 1.6e-45                                                      | 151.4         | 0.0 | 1.9e-45 | 151.2 | 0.0  | 1.0     | 1     | CYA_2145      | bacterioferritin comigratory protein                              |   |          |             |
| 2.8e-44                                                      | 147.4         | 0.0 | 3.9e-44 | 146.9 | 0.0  | 1.2     | 1     | CYA_0537      | antioxidant, AhpC/Tsa family                                      |   |          |             |
| 2.6e-43                                                      | 144.2         | 0.0 | 3.2e-43 | 143.9 | 0.0  | 1.1     | 1     | CYA_0907      | antioxidant, AhpC/Tsa family                                      |   |          |             |
| 1.1e-42                                                      | 142.2         | 0.0 | 1.3e-42 | 142.0 | 0.0  | 1.0     | 1     | CYA_0672      | antioxidant, AhpC/Tsa family                                      |   |          |             |
| 6.8e-36                                                      | 120.3         | 0.0 | 9e-36   | 119.9 | 0.0  | 1.2     | 1     | CYA_2849      | antioxidant, AhpC/Tsa family                                      |   |          |             |
| 8.8e-36                                                      | 119.9         | 0.0 | 1e-35   | 119.7 | 0.0  | 1.0     | 1     | CYA_2305      | antioxidant, AhpC/TSA family                                      |   |          |             |
| 9.8e-35                                                      | 116.5         | 0.0 | 1.2e-34 | 116.2 | 0.0  | 1.1     | 1     | CYA_1949      | AhpC/TSA family protein                                           |   |          |             |
| 1.5e-26                                                      | 90.1          | 0.0 | 2e-26   | 89.7  | 0.0  | 1.2     | 1     | CYA_2781      | hypothetical protein                                              |   |          |             |
| <b><i>Arthrospira platensis</i> NIES-39 (In complete)</b>    |               |     |         |       |      |         |       |               |                                                                   |   |          |             |
| 2.6e-43                                                      | 145.5         | 0.0 | 3.2e-43 | 145.2 | 0.0  | 1.1     | 1     | NIES39_A03490 | bacterioferritin comigratory protein                              |   |          |             |
| 3.5e-41                                                      | 138.6         | 0.0 | 4.2e-41 | 138.3 | 0.0  | 1.1     | 1     | NIES39_L02380 | putative bacterioferritin comigratory protein                     |   |          |             |
| 3.9e-41                                                      | 138.4         | 0.0 | 4.9e-41 | 138.1 | 0.0  | 1.1     | 1     | NIES39_M00250 | peroxiredoxin                                                     |   |          |             |
| 1.4e-40                                                      | 136.7         | 0.0 | 1.6e-40 | 136.5 | 0.0  | 1.0     | 1     | NIES39_E01510 | putative bacterioferritin comigratory protein                     |   |          |             |
| 1.1e-39                                                      | 133.7         | 0.0 | 1.4e-39 | 133.5 | 0.0  | 1.1     | 1     | NIES39_O06760 | putative bacterioferritin comigratory protein                     |   |          |             |
| 8.7e-34                                                      | 114.7         | 0.0 | 1.2e-33 | 114.3 | 0.0  | 1.2     | 1     | NIES39_F00560 | putative peroxiredoxin                                            |   |          |             |
| 1.7e-28                                                      | 97.6          | 0.0 | 2.1e-28 | 97.3  | 0.0  | 1.1     | 1     | NIES39_J00990 | putative thiol-specific antioxidant protein                       |   |          |             |
| 8.3e-22                                                      | 76.0          | 0.0 | 1.2e-21 | 75.5  | 0.0  | 1.2     | 1     | NIES39_E02230 | probable bacterioferritin comigratory protein                     |   |          |             |
| 7.6e-21                                                      | 72.9          | 0.0 | 9.9e-21 | 72.5  | 0.0  | 1.2     | 1     | NIES39_Q00510 | hypothetical protein                                              |   |          |             |
| 1.7e-19                                                      | 68.5          | 0.0 | 2.1e-19 | 68.2  | 0.0  | 1.1     | 1     | NIES39_C03410 | hypothetical protein                                              |   |          |             |
| 7.8e-15                                                      | 53.5          | 0.0 | 9.5e-15 | 53.2  | 0.0  | 1.1     | 1     | NIES39_M02570 | putative peroxiredoxin*                                           |   |          |             |
| <b><i>Trichodesmium erythraeum</i> IMS101 (Complete)</b>     |               |     |         |       |      |         |       |               |                                                                   |   |          |             |
| 4.9e-45                                                      | 150.5         | 0.0 | 6.2e-45 | 150.2 | 0.0  | 1.1     | 1     | Tery_0235     | alkyl hydroperoxide reductase/ Thiol specific antioxidant protein |   |          |             |



|                                                           |       |     |         |       |     |     |   |                  |                                                        |
|-----------------------------------------------------------|-------|-----|---------|-------|-----|-----|---|------------------|--------------------------------------------------------|
| 9.6e-43                                                   | 143.1 | 0.0 | 1.1e-42 | 142.9 | 0.0 | 1.0 | 1 | Tery_3959        | redoxin                                                |
| 1.3e-42                                                   | 142.7 | 0.0 | 1.6e-42 | 142.4 | 0.0 | 1.1 | 1 | Tery_3182        | redoxin                                                |
| 2.6e-40                                                   | 135.2 | 0.0 | 3.6e-40 | 134.8 | 0.0 | 1.2 | 1 | Tery_2703        | redoxin                                                |
| 4.8e-36                                                   | 121.4 | 0.0 | 6.2e-36 | 121.1 | 0.0 | 1.1 | 1 | Tery_5038        | 1-Cys peroxiredoxin                                    |
| 3.3e-24                                                   | 83.2  | 0.0 | 4.2e-24 | 82.8  | 0.0 | 1.2 | 1 | Tery_0234        | redoxin                                                |
| 3.7e-21                                                   | 73.4  | 0.1 | 5e-21   | 72.9  | 0.0 | 1.2 | 1 | Tery_3842        | redoxin                                                |
| 3.3e-15                                                   | 54.1  | 0.0 | 4.2e-15 | 53.8  | 0.0 | 1.2 | 1 | Tery_0162        | redoxin                                                |
| 4.1e-06                                                   | 24.8  | 0.1 | 5e-06   | 24.5  | 0.0 | 1.1 | 1 | Tery_2011        | thioredoxin domain-containing protein*                 |
| <b><i>Prochlorococcus marinus</i> SS120 (Complete)</b>    |       |     |         |       |     |     |   |                  |                                                        |
| 1.4e-39                                                   | 131.7 | 0.0 | 1.8e-39 | 131.3 | 0.0 | 1.2 | 1 | Pro0978          | Peroxiredoxin, AhpC/TSA family                         |
| 1.1e-35                                                   | 119.0 | 0.0 | 1.3e-35 | 118.8 | 0.0 | 1.1 | 1 | Pro0093          | Peroxiredoxin                                          |
| 3e-35                                                     | 117.7 | 0.0 | 3.6e-35 | 117.4 | 0.0 | 1.1 | 1 | Pro0932          | Peroxiredoxin                                          |
| <b><i>Synechococcus</i> sp. RCC307 (Complete)</b>         |       |     |         |       |     |     |   |                  |                                                        |
| 4.8e-44                                                   | 146.5 | 0.0 | 7.2e-44 | 145.9 | 0.0 | 1.3 | 1 | SynRCC307_1238   | Peroxiredoxin, AhpC/TSA family                         |
| 3.8e-40                                                   | 133.9 | 0.0 | 4.5e-40 | 133.6 | 0.0 | 1.1 | 1 | SynRCC307_0392   | Peroxiredoxin                                          |
| 4.3e-35                                                   | 117.6 | 0.0 | 5.1e-35 | 117.3 | 0.0 | 1.1 | 1 | SynRCC307_1342   | Peroxiredoxin                                          |
| 7.9e-34                                                   | 113.5 | 0.0 | 9.6e-34 | 113.2 | 0.0 | 1.1 | 1 | SynRCC307_1384   | Peroxiredoxin                                          |
| 2.2e-33                                                   | 112.1 | 0.0 | 2.9e-33 | 111.7 | 0.0 | 1.2 | 1 | SynRCC307_0386   | Peroxiredoxin                                          |
| <b><i>Microcystis aeruginosa</i> NIES-843 (Complete)</b>  |       |     |         |       |     |     |   |                  |                                                        |
| 5.5e-43                                                   | 144.4 | 0.0 | 6.8e-43 | 144.0 | 0.0 | 1.1 | 1 | MAE35830         | thioredoxin peroxidase                                 |
| 5.1e-42                                                   | 141.2 | 0.0 | 6.3e-42 | 140.9 | 0.0 | 1.1 | 1 | MAE15330         | bacterioferritin comigratory protein                   |
| 3.8e-40                                                   | 135.2 | 0.1 | 4.4e-40 | 135.0 | 0.0 | 1.0 | 1 | MAE60930         | bacterioferritin comigratory protein                   |
| 2.2e-39                                                   | 132.7 | 0.0 | 2.6e-39 | 132.5 | 0.0 | 1.1 | 1 | MAE44920         | bacterioferritin comigratory protein homolog           |
| 5.3e-33                                                   | 112.1 | 0.0 | 7.2e-33 | 111.7 | 0.0 | 1.2 | 1 | MAE36510         | peroxiredoxin                                          |
| 1.4e-21                                                   | 75.2  | 0.0 | 1.8e-21 | 74.8  | 0.0 | 1.2 | 1 | MAE59730         | hypothetical protein                                   |
| 3e-16                                                     | 58.0  | 0.0 | 4.1e-15 | 54.3  | 0.0 | 2.0 | 2 | MAE62780         | putative peroxiredoxin                                 |
| <b><i>Synechococcus elongatus</i> PCC 6301 (Complete)</b> |       |     |         |       |     |     |   |                  |                                                        |
| 7.7e-44                                                   | 145.8 | 0.0 | 8.9e-44 | 145.6 | 0.0 | 1.0 | 1 | syc2152_c        | bacterioferritin comigratory protein homolog           |
| 5e-43                                                     | 143.2 | 0.0 | 6.9e-43 | 142.7 | 0.0 | 1.2 | 1 | syc1793_d        | thioredoxin peroxidase                                 |
| 9.1e-40                                                   | 132.7 | 0.0 | 1.1e-39 | 132.4 | 0.0 | 1.1 | 1 | syc2287_c        | bacterioferritin comigratory protein                   |
| 2.6e-39                                                   | 131.2 | 0.0 | 3e-39   | 131.0 | 0.0 | 1.1 | 1 | syc0883_d        | bacterioferritin comigratory protein                   |
| 4.2e-38                                                   | 127.3 | 0.0 | 4.9e-38 | 127.1 | 0.0 | 1.0 | 1 | syc1915_d        | bacterioferritin comigratory protein                   |
| 1.2e-33                                                   | 112.9 | 0.0 | 1.5e-33 | 112.6 | 0.0 | 1.1 | 1 | syc1657_c        | antioxidant protein] rehydrin                          |
| 8.9e-20                                                   | 68.1  | 0.0 | 1.2e-19 | 67.7  | 0.0 | 1.2 | 1 | syc2361_c        | hypothetical protein                                   |
| <b><i>Synechocystis</i> sp. PCC 6803 (Complete)</b>       |       |     |         |       |     |     |   |                  |                                                        |
| 1.6e-43                                                   | 145.4 | 0.0 | 2e-43   | 145.0 | 0.0 | 1.2 | 1 | sll0755          | thioredoxin peroxidase                                 |
| 5.2e-42                                                   | 140.4 | 0.0 | 6.2e-42 | 140.2 | 0.0 | 1.1 | 1 | sll0221          | bacterioferritin comigratory protein                   |
| 5.4e-42                                                   | 140.4 | 0.0 | 6.4e-42 | 140.1 | 0.0 | 1.1 | 1 | slr0242          | bacterioferritin comigratory protein homolog           |
| 1.3e-33                                                   | 113.3 | 0.0 | 1.8e-33 | 112.9 | 0.0 | 1.2 | 1 | slr1198          | antioxidant protein                                    |
| 3.9e-33                                                   | 111.8 | 0.0 | 5.3e-33 | 111.3 | 0.0 | 1.2 | 1 | sll1159          | probable bacterioferritin comigratory protein          |
| 2.5e-21                                                   | 73.6  | 0.0 | 3e-21   | 73.4  | 0.0 | 1.1 | 1 | sll1289          | hypothetical protein                                   |
| <b><i>Synechococcus</i> sp. PCC 7002 (Complete)</b>       |       |     |         |       |     |     |   |                  |                                                        |
| 1e-43                                                     | 145.7 | 0.0 | 1.4e-43 | 145.3 | 0.0 | 1.1 | 1 | SYNPCC7002_A0558 | Alkyl hydroperoxide reductase; peroxiredoxi            |
| 2.5e-41                                                   | 138.0 | 0.0 | 2.9e-41 | 137.8 | 0.0 | 1.0 | 1 | SYNPCC7002_A1108 | bacterioferritin comigratory protein                   |
| 1e-40                                                     | 136.1 | 0.0 | 1.2e-40 | 135.8 | 0.0 | 1.1 | 1 | SYNPCC7002_A0109 | AhpC/TSA family (bacterioferritin comigratory protein) |
| 3e-34                                                     | 115.2 | 0.0 | 3.9e-34 | 114.8 | 0.0 | 1.1 | 1 | SYNPCC7002_A0320 | AhpC/TSA family                                        |
| 5.4e-24                                                   | 82.0  | 0.0 | 6.8e-24 | 81.7  | 0.0 | 1.1 | 1 | SYNPCC7002_A1383 | Peroxiredoxin                                          |
| 2.4e-16                                                   | 57.4  | 0.0 | 3.2e-16 | 56.9  | 0.0 | 1.2 | 1 | SYNPCC7002_A0793 | AhpC/TSA family protein                                |
| <b><i>Anabaena</i> sp. PCC 7120 (Complete)</b>            |       |     |         |       |     |     |   |                  |                                                        |
| 5e-47                                                     | 157.4 | 0.0 | 6.3e-47 | 157.0 | 0.0 | 1.1 | 1 | alr4641          | peroxiredoxin                                          |
| 7.2e-43                                                   | 143.9 | 0.0 | 8.6e-43 | 143.7 | 0.0 | 1.1 | 1 | alr3183          | bacterioferritin comigratory protein                   |
| 6.7e-42                                                   | 140.8 | 0.0 | 7.9e-42 | 140.6 | 0.0 | 1.1 | 1 | alr2503          | bacterioferritin comigratory protein                   |
| 9.3e-42                                                   | 140.3 | 0.1 | 1.1e-41 | 140.2 | 0.0 | 1.0 | 1 | all2375          | similar to bacterioferritin comigratory protein        |

|                                                           |       |     |         |       |     |     |   |                 |                                                                   |
|-----------------------------------------------------------|-------|-----|---------|-------|-----|-----|---|-----------------|-------------------------------------------------------------------|
| 1.2e-39                                                   | 133.5 | 0.0 | 1.5e-39 | 133.2 | 0.0 | 1.1 | 1 | all2556         | bacterioferritin comigratory protein                              |
| 2.7e-32                                                   | 109.8 | 0.0 | 3.8e-32 | 109.3 | 0.0 | 1.2 | 1 | alr4404         | AhpC/TSA family protein                                           |
| 2.6e-26                                                   | 90.4  | 0.0 | 3.6e-26 | 90.0  | 0.0 | 1.2 | 1 | alr4642         | putative thiol-specific antioxidant protein                       |
| 4.7e-22                                                   | 76.7  | 0.0 | 5.9e-22 | 76.4  | 0.0 | 1.1 | 1 | all0513         | hypothetical protein                                              |
| 5.1e-18                                                   | 63.7  | 0.0 | 6.1e-18 | 63.4  | 0.0 | 1.1 | 1 | alr1206         | hypothetical protein                                              |
| <b><i>Gloeobacter violaceus</i> PCC 7421 (Complete)</b>   |       |     |         |       |     |     |   |                 |                                                                   |
| 1.6e-41                                                   | 139.1 | 0.0 | 1.8e-41 | 138.9 | 0.0 | 1.0 | 1 | glr2375         | probable bacterioferritin comigratory protein                     |
| 2.2e-40                                                   | 135.4 | 0.0 | 2.6e-40 | 135.2 | 0.0 | 1.1 | 1 | glr2376         | probable bacterioferritin comigratory protein                     |
| 3.2e-40                                                   | 134.9 | 0.0 | 4e-40   | 134.6 | 0.0 | 1.1 | 1 | gll3158         | probable peroxiredoxin                                            |
| 2.1e-38                                                   | 129.1 | 0.0 | 2.5e-38 | 128.8 | 0.0 | 1.1 | 1 | glr3389         | bacterioferritin comigratory protein                              |
| 8.1e-38                                                   | 127.2 | 0.0 | 1.1e-37 | 126.7 | 0.0 | 1.2 | 1 | glr2155         | AhpC/TSA family protein                                           |
| 2e-32                                                     | 109.7 | 0.0 | 2.4e-32 | 109.5 | 0.0 | 1.1 | 1 | gll0506         | bacterioferritin comigratory protein                              |
| 3.8e-28                                                   | 95.9  | 0.0 | 4.8e-28 | 95.6  | 0.0 | 1.1 | 1 | glr0029         | hypothetical protein                                              |
| 1.2e-19                                                   | 68.5  | 0.0 | 1.8e-19 | 67.9  | 0.0 | 1.3 | 1 | glr2108         | hypothetical protein                                              |
| 7.5e-16                                                   | 56.2  | 0.0 | 1.1e-15 | 55.7  | 0.0 | 1.2 | 1 | glr3964         | hypothetical protein                                              |
| <b><i>Cyanothece</i> sp. PCC 7424 (Complete)</b>          |       |     |         |       |     |     |   |                 |                                                                   |
| 2.1e-45                                                   | 152.0 | 0.0 | 2.7e-45 | 151.7 | 0.0 | 1.1 | 1 | PCC7424_0090    | alkyl hydroperoxide reductase/ Thiol specific antioxidant protein |
| 8.6e-43                                                   | 143.6 | 0.0 | 1.1e-42 | 143.3 | 0.0 | 1.1 | 1 | PCC7424_5046    | alkyl hydroperoxide reductase/ Thiol specific antioxidant protein |
| 1.3e-42                                                   | 143.0 | 0.0 | 1.6e-42 | 142.7 | 0.0 | 1.1 | 1 | PCC7424_2927    | alkyl hydroperoxide reductase/ Thiol specific antioxidant protein |
| 1.9e-42                                                   | 142.4 | 0.1 | 2.2e-42 | 142.2 | 0.1 | 1.0 | 1 | PCC7424_3638    | alkyl hydroperoxide reductase/ Thiol specific antioxidant protein |
| 5.3e-42                                                   | 141.0 | 0.0 | 6.1e-42 | 140.8 | 0.0 | 1.0 | 1 | PCC7424_4280    | alkyl hydroperoxide reductase/ Thiol specific antioxidant protein |
| 2.7e-36                                                   | 122.6 | 0.0 | 3.7e-36 | 122.1 | 0.0 | 1.2 | 1 | PCC7424_0397    | Peroxidase                                                        |
| 1.3e-28                                                   | 97.7  | 0.0 | 1.6e-28 | 97.5  | 0.0 | 1.1 | 1 | PCC7424_1402    | alkyl hydroperoxide reductase/ Thiol specific antioxidant protein |
| 2.2e-23                                                   | 80.9  | 0.1 | 3.1e-23 | 80.4  | 0.0 | 1.2 | 1 | PCC7424_4031    | alkyl hydroperoxide reductase/ Thiol specific antioxidant protein |
| 1.8e-17                                                   | 61.8  | 0.0 | 1.1e-15 | 56.1  | 0.0 | 2.1 | 2 | PCC7424_2508    | glutaredoxin-family domain protein                                |
| <b><i>Cyanothece</i> sp. PCC 7425 (Complete)</b>          |       |     |         |       |     |     |   |                 |                                                                   |
| 2.3e-43                                                   | 145.4 | 0.0 | 2.8e-43 | 145.0 | 0.0 | 1.1 | 1 | Cyan7425_0928   | alkyl hydroperoxide reductase/ Thiol specific antioxidant protein |
| 2.6e-41                                                   | 138.7 | 0.0 | 3e-41   | 138.5 | 0.0 | 1.0 | 1 | Cyan7425_1511   | alkyl hydroperoxide reductase/ Thiol specific antioxidant protein |
| 5.6e-41                                                   | 137.6 | 0.0 | 6.5e-41 | 137.4 | 0.0 | 1.0 | 1 | Cyan7425_5136   | alkyl hydroperoxide reductase/ Thiol specific antioxidant protein |
| 1e-40                                                     | 136.8 | 0.0 | 1.2e-40 | 136.6 | 0.0 | 1.1 | 1 | Cyan7425_3716   | alkyl hydroperoxide reductase/ Thiol specific antioxidant protein |
| 4.7e-38                                                   | 128.2 | 0.0 | 5.6e-38 | 127.9 | 0.0 | 1.1 | 1 | Cyan7425_2289   | alkyl hydroperoxide reductase/ Thiol specific antioxidant protein |
| 3.5e-32                                                   | 109.2 | 0.0 | 5.1e-32 | 108.7 | 0.0 | 1.3 | 1 | Cyan7425_0215   | Peroxidase                                                        |
| 1.6e-27                                                   | 94.2  | 0.0 | 2e-27   | 93.9  | 0.0 | 1.1 | 1 | Cyan7425_4300   | alkyl hydroperoxide reductase/ Thiol specific antioxidant protein |
| 1.6e-22                                                   | 78.0  | 0.0 | 2e-22   | 77.7  | 0.0 | 1.1 | 1 | Cyan7425_0955   | alkyl hydroperoxide reductase/ Thiol specific antioxidant protein |
| 6.5e-17                                                   | 59.9  | 0.0 | 8.3e-17 | 59.5  | 0.0 | 1.1 | 1 | Cyan7425_1596   | Peroxiredoxin                                                     |
| <b><i>Synechococcus</i> sp. WH 7803 (Complete)</b>        |       |     |         |       |     |     |   |                 |                                                                   |
| 6.2e-45                                                   | 149.4 | 0.0 | 9.4e-45 | 148.8 | 0.0 | 1.3 | 1 | SynWH7803_1118  | Peroxiredoxin, AhpC/TSA family                                    |
| 4.3e-41                                                   | 136.9 | 0.0 | 5e-41   | 136.7 | 0.0 | 1.0 | 1 | SynWH7803_1042  | Peroxiredoxin                                                     |
| 1.1e-37                                                   | 125.9 | 0.0 | 1.4e-37 | 125.6 | 0.0 | 1.1 | 1 | SynWH7803_1236  | Peroxiredoxin                                                     |
| 2e-36                                                     | 121.9 | 0.0 | 2.3e-36 | 121.7 | 0.0 | 1.0 | 1 | SynWH7803_2172  | Peroxiredoxin                                                     |
| <b><i>Synechococcus elongatus</i> PCC 7942 (Complete)</b> |       |     |         |       |     |     |   |                 |                                                                   |
| 8.1e-44                                                   | 145.8 | 0.0 | 9.4e-44 | 145.6 | 0.0 | 1.0 | 1 | Synpcc7942_1942 | bacterioferritin comigratory protein-like                         |
| 5e-43                                                     | 143.3 | 0.0 | 6.9e-43 | 142.8 | 0.0 | 1.2 | 1 | Synpcc7942_2309 | thioredoxin peroxidase                                            |
| 9.6e-40                                                   | 132.7 | 0.0 | 1.1e-39 | 132.4 | 0.0 | 1.1 | 1 | Synpcc7942_1806 | bacterioferritin comigratory protein                              |
| 2.7e-39                                                   | 131.2 | 0.0 | 3.2e-39 | 131.0 | 0.0 | 1.1 | 1 | Synpcc7942_0642 | bacterioferritin comigratory protein                              |
| 4.5e-38                                                   | 127.3 | 0.0 | 5.2e-38 | 127.1 | 0.0 | 1.0 | 1 | Synpcc7942_2180 | bacterioferritin comigratory protein                              |
| 3.9e-34                                                   | 114.6 | 0.0 | 5e-34   | 114.2 | 0.0 | 1.1 | 1 | Synpcc7942_2449 | 1-Cys peroxiredoxin                                               |
| 9.5e-20                                                   | 68.1  | 0.0 | 1.3e-19 | 67.7  | 0.0 | 1.2 | 1 | Synpcc7942_1730 | hypothetical protein                                              |
| <b><i>Synechococcus</i> sp. WH8102 (Complete)</b>         |       |     |         |       |     |     |   |                 |                                                                   |
| 1e-44                                                     | 148.7 | 0.0 | 1.6e-44 | 148.0 | 0.0 | 1.3 | 1 | SYNW1213        | thioredoxin peroxidase                                            |
| 1.5e-38                                                   | 128.7 | 0.0 | 1.8e-38 | 128.5 | 0.0 | 1.1 | 1 | SYNW2162        | putative bacterioferritin comigratory (BCP) protein               |
| 1.4e-35                                                   | 119.1 | 0.0 | 1.6e-35 | 119.0 | 0.0 | 1.0 | 1 | SYNW1015        | putative bacterioferritin comigratory protein                     |
| 5.3e-34                                                   | 114.0 | 0.0 | 6.5e-34 | 113.8 | 0.0 | 1.1 | 1 | SYNW1280        | Alkyl hydroperoxide reductase/ Thiol specific antioxidant protein |

| <b>Cyanothece sp. PCC 8801 (Complete)</b>                  |       |     |         |       |     |     |   |              |                                                                   |  |
|------------------------------------------------------------|-------|-----|---------|-------|-----|-----|---|--------------|-------------------------------------------------------------------|--|
| 7.7e-44                                                    | 146.6 | 0.0 | 9.5e-44 | 146.3 | 0.0 | 1.1 | 1 | PCC8801_3492 | alkyl hydroperoxide reductase/ Thiol specific antioxidant protein |  |
| 2e-43                                                      | 145.3 | 0.0 | 2.4e-43 | 145.0 | 0.0 | 1.1 | 1 | PCC8801_1115 | alkyl hydroperoxide reductase/ Thiol specific antioxidant protein |  |
| 4.1e-42                                                    | 141.0 | 0.0 | 5.2e-42 | 140.7 | 0.0 | 1.1 | 1 | PCC8801_1491 | alkyl hydroperoxide reductase/ Thiol specific antioxidant protein |  |
| 7.6e-42                                                    | 140.2 | 0.1 | 8.7e-42 | 140.0 | 0.1 | 1.0 | 1 | PCC8801_1631 | alkyl hydroperoxide reductase/ Thiol specific antioxidant protein |  |
| 2.5e-35                                                    | 119.1 | 0.0 | 3.9e-35 | 118.5 | 0.0 | 1.3 | 1 | PCC8801_4218 | Peroxidase                                                        |  |
| 1.6e-27                                                    | 93.9  | 0.0 | 2e-27   | 93.6  | 0.0 | 1.1 | 1 | PCC8801_3616 | alkyl hydroperoxide reductase/ Thiol specific antioxidant protein |  |
| 6.9e-24                                                    | 82.1  | 0.1 | 8.6e-24 | 81.8  | 0.1 | 1.1 | 1 | PCC8801_4240 | alkyl hydroperoxide reductase/ Thiol specific antioxidant protein |  |
| <b>Prochlorococcus marinus str. MIT 9211 (In complete)</b> |       |     |         |       |     |     |   |              |                                                                   |  |
| 2.6e-44                                                    | 146.9 | 0.0 | 4e-44   | 146.3 | 0.0 | 1.3 | 1 | P9211_09041  | thioredoxin peroxidase                                            |  |
| 3.4e-38                                                    | 127.1 | 0.0 | 4e-38   | 126.9 | 0.0 | 1.1 | 1 | P9211_00881  | putative bacterioferritin comigratory (BCP) protein               |  |
| 1.1e-36                                                    | 122.2 | 0.0 | 1.4e-36 | 122.0 | 0.0 | 1.1 | 1 | P9211_15101  | Peroxiredoxin                                                     |  |
| 1.1e-35                                                    | 119.0 | 0.0 | 1.4e-35 | 118.7 | 0.0 | 1.1 | 1 | P9211_08571  | Alkyl hydroperoxide reductase/ Thiol specific antioxidant protein |  |
| <b>Prochlorococcus marinus str. MIT 9215 (In complete)</b> |       |     |         |       |     |     |   |              |                                                                   |  |
| 1.6e-40                                                    | 134.7 | 0.0 | 3.2e-40 | 133.8 | 0.0 | 1.4 | 2 | P9215_10441  | thioredoxin peroxidase                                            |  |
| 5.3e-37                                                    | 123.4 | 0.0 | 6.3e-37 | 123.1 | 0.0 | 1.1 | 1 | P9215_09891  | Alkyl hydroperoxide reductase/ Thiol specific antioxidant protein |  |
| 2.1e-36                                                    | 121.5 | 0.1 | 2.4e-36 | 121.3 | 0.1 | 1.0 | 1 | P9215_00921  | putative bacterioferritin comigratory (BCP) protein               |  |
| 3.6e-33                                                    | 111.0 | 0.0 | 4.2e-33 | 110.8 | 0.0 | 1.1 | 1 | P9215_03801  | putative bacterioferritin comigratory protein                     |  |
| <b>Prochlorococcus marinus str. MIT 9301 (In complete)</b> |       |     |         |       |     |     |   |              |                                                                   |  |
| 1e-40                                                      | 135.3 | 0.0 | 2e-40   | 134.4 | 0.0 | 1.5 | 2 | P9301_10121  | thioredoxin peroxidase                                            |  |
| 1.6e-36                                                    | 121.8 | 0.0 | 1.9e-36 | 121.6 | 0.0 | 1.1 | 1 | P9301_09561  | Alkyl hydroperoxide reductase/ Thiol specific antioxidant protein |  |
| 1.6e-36                                                    | 121.8 | 0.1 | 1.9e-36 | 121.6 | 0.1 | 1.0 | 1 | P9301_00911  | putative bacterioferritin comigratory (BCP) protein               |  |
| 7.3e-33                                                    | 110.0 | 0.0 | 8.5e-33 | 109.8 | 0.0 | 1.1 | 1 | P9301_03801  | putative bacterioferritin comigratory protein                     |  |
| <b>Prochlorococcus marinus str. MIT 9303 (Complete)</b>    |       |     |         |       |     |     |   |              |                                                                   |  |
| 3.8e-44                                                    | 147.0 | 0.0 | 5.7e-44 | 146.5 | 0.0 | 1.3 | 1 | P9303_14621  | thioredoxin peroxidase                                            |  |
| 1.1e-38                                                    | 129.5 | 0.0 | 1.3e-38 | 129.2 | 0.0 | 1.1 | 1 | P9303_19011  | putative bacterioferritin comigratory protein                     |  |
| 1.5e-36                                                    | 122.5 | 0.0 | 1.8e-36 | 122.3 | 0.0 | 1.1 | 1 | P9303_02611  | putative bacterioferritin comigratory (BCP) protein               |  |
| 4.2e-32                                                    | 108.2 | 0.0 | 5.1e-32 | 107.9 | 0.0 | 1.1 | 1 | P9303_10801  | Alkyl hydroperoxide reductase/ Thiol specific antioxidant protein |  |
| <b>Synechococcus sp. CC9311 (Complete)</b>                 |       |     |         |       |     |     |   |              |                                                                   |  |
| 2.5e-44                                                    | 147.6 | 0.0 | 3.9e-44 | 146.9 | 0.0 | 1.3 | 1 | sync_1322    | thioredoxin peroxidase                                            |  |
| 4.6e-37                                                    | 124.1 | 0.0 | 5.2e-37 | 123.9 | 0.0 | 1.0 | 1 | sync_1556    | bacterioferritin comigratory protein                              |  |
| 7.7e-36                                                    | 120.2 | 0.0 | 9.1e-36 | 119.9 | 0.0 | 1.1 | 1 | sync_1400    | Alkyl hydroperoxide reductase/ Thiol specific antioxidant protein |  |
| 9e-36                                                      | 119.9 | 0.0 | 1.1e-35 | 119.7 | 0.0 | 1.1 | 1 | sync_2508    | bacterioferritin comigratory protein                              |  |
| 3e-15                                                      | 53.7  | 0.0 | 4e-15   | 53.2  | 0.0 | 1.1 | 1 | sync_0689    | peroxiredoxin 2 family protein                                    |  |
| 2.3e-09                                                    | 34.7  | 0.0 | 3e-09   | 34.3  | 0.0 | 1.2 | 1 | sync_0254    | Thioredoxin family protein                                        |  |
| <b>Prochlorococcus marinus MIT9312 (Complete)</b>          |       |     |         |       |     |     |   |              |                                                                   |  |
| 6.7e-40                                                    | 132.7 | 0.0 | 1.3e-39 | 131.8 | 0.0 | 1.5 | 2 | PMT9312_0944 | thioredoxin peroxidase                                            |  |
| 4.6e-37                                                    | 123.6 | 0.0 | 5.5e-37 | 123.3 | 0.0 | 1.1 | 1 | PMT9312_0897 | alkyl hydroperoxide reductase/thiol specific antioxidant protein  |  |
| 4.2e-36                                                    | 120.5 | 0.1 | 4.9e-36 | 120.3 | 0.1 | 1.0 | 1 | PMT9312_0082 | putative bacterioferritin comigratory (BCP) protein               |  |
| 1.3e-33                                                    | 112.4 | 0.0 | 1.5e-33 | 112.2 | 0.0 | 1.1 | 1 | PMT9312_0353 | putative bacterioferritin comigratory protein                     |  |
| <b>Prochlorococcus marinus MIT9313 (Complete)</b>          |       |     |         |       |     |     |   |              |                                                                   |  |
| 2.4e-44                                                    | 147.3 | 0.0 | 3.5e-44 | 146.8 | 0.0 | 1.3 | 1 | PMT0754      | thioredoxin peroxidase                                            |  |
| 1.2e-38                                                    | 128.9 | 0.0 | 1.4e-38 | 128.6 | 0.0 | 1.1 | 1 | PMT0387      | putative bacterioferritin comigratory protein                     |  |
| 8.5e-37                                                    | 122.9 | 0.0 | 9.9e-37 | 122.7 | 0.0 | 1.1 | 1 | PMT1622      | putative bacterioferritin comigratory (BCP) protein               |  |
| 1.9e-32                                                    | 108.9 | 0.0 | 2.3e-32 | 108.6 | 0.0 | 1.1 | 1 | PMT1012      | Alkyl hydroperoxide reductase/ Thiol specific antioxidant protein |  |
| 8.2e-13                                                    | 45.4  | 0.0 | 1.1e-12 | 45.0  | 0.0 | 1.2 | 1 | PMT1186      | Alkyl hydroperoxide reductase/ Thiol specific antioxidant protein |  |
| <b>Prochlorococcus marinus str. MIT 9515 (In complete)</b> |       |     |         |       |     |     |   |              |                                                                   |  |
| 2.5e-41                                                    | 137.3 | 0.1 | 4.8e-41 | 136.4 | 0.0 | 1.5 | 2 | P9515_09331  | thioredoxin peroxidase                                            |  |
| 3.5e-35                                                    | 117.5 | 0.0 | 4.2e-35 | 117.2 | 0.0 | 1.1 | 1 | P9515_09851  | Alkyl hydroperoxide reductase/ Thiol specific antioxidant protein |  |
| 4e-35                                                      | 117.3 | 0.1 | 4.7e-35 | 117.0 | 0.1 | 1.0 | 1 | P9515_00891  | putative bacterioferritin comigratory (BCP) protein               |  |
| 2.7e-31                                                    | 104.9 | 0.0 | 3.2e-31 | 104.7 | 0.0 | 1.1 | 1 | P9515_03821  | putative bacterioferritin comigratory protein                     |  |
| <b>Prochlorococcus marinus str. AS9601 (Complete)</b>      |       |     |         |       |     |     |   |              |                                                                   |  |
| 1.3e-40                                                    | 135.0 | 0.0 | 2.5e-40 | 134.1 | 0.0 | 1.5 | 2 | A9601_10131  | thioredoxin peroxidase                                            |  |

|                                                         |       |     |         |       |     |     |   |                |                                                                   |
|---------------------------------------------------------|-------|-----|---------|-------|-----|-----|---|----------------|-------------------------------------------------------------------|
| 4.3e-36                                                 | 120.4 | 0.0 | 5.2e-36 | 120.1 | 0.0 | 1.1 | 1 | A9601_09581    | Alkyl hydroperoxide reductase/ Thiol specific antioxidant protein |
| 8.4e-36                                                 | 119.5 | 0.1 | 9.8e-36 | 119.3 | 0.0 | 1.0 | 1 | A9601_00921    | putative bacterioferritin comigratory (BCP) protein               |
| 4e-33                                                   | 110.8 | 0.0 | 4.7e-33 | 110.6 | 0.0 | 1.1 | 1 | A9601_03811    | putative bacterioferritin comigratory protein                     |
| <b><i>Synechococcus</i> sp. CC9605 (Complete)</b>       |       |     |         |       |     |     |   |                |                                                                   |
| 1.5e-43                                                 | 145.0 | 0.0 | 2.4e-43 | 144.3 | 0.0 | 1.3 | 1 | Syncc9605_1324 | thioredoxin peroxidase                                            |
| 1.7e-38                                                 | 128.6 | 0.0 | 2e-38   | 128.4 | 0.0 | 1.0 | 1 | Syncc9605_2307 | putative bacterioferritin comigratory (BCP) protein               |
| 5.4e-37                                                 | 123.8 | 0.0 | 6.3e-37 | 123.6 | 0.0 | 1.0 | 1 | Syncc9605_1141 | putative bacterioferritin comigratory protein                     |
| 7e-35                                                   | 116.9 | 0.0 | 8.3e-35 | 116.7 | 0.0 | 1.1 | 1 | Syncc9605_1406 | Twin-arginine translocation pathway signal                        |
| 1.2e-14                                                 | 51.6  | 0.0 | 1.8e-14 | 51.0  | 0.0 | 1.2 | 1 | Syncc9605_0215 | conserved hypothetical protein                                    |
| <b><i>Synechococcus</i> sp. CC9902 (Complete)</b>       |       |     |         |       |     |     |   |                |                                                                   |
| 6.2e-45                                                 | 149.2 | 0.0 | 9.6e-45 | 148.6 | 0.0 | 1.3 | 1 | Syncc9902_1150 | thioredoxin peroxidase                                            |
| 2.3e-38                                                 | 128.0 | 0.0 | 2.7e-38 | 127.8 | 0.0 | 1.0 | 1 | Syncc9902_0386 | putative bacterioferritin comigratory (BCP) prtein                |
| 2.8e-38                                                 | 127.7 | 0.0 | 3.3e-38 | 127.5 | 0.0 | 1.0 | 1 | Syncc9902_1316 | putative bacterioferritin comigratory protein                     |
| 1.4e-36                                                 | 122.2 | 0.0 | 1.7e-36 | 122.0 | 0.0 | 1.1 | 1 | Syncc9902_1080 | alkyl hydroperoxide reductase/thiol specific antioxidant protein  |
| 2.7e-11                                                 | 40.5  | 0.0 | 4.2e-11 | 39.9  | 0.0 | 1.3 | 1 | Syncc9902_0242 | conserved hypothetical protein                                    |
| <b><i>Acaryochloris marina</i> MBIC11017 (Complete)</b> |       |     |         |       |     |     |   |                |                                                                   |
| 9.7e-44                                                 | 147.2 | 0.0 | 1.2e-43 | 146.9 | 0.0 | 1.1 | 1 | AM1_2698       | 2-cys peroxiredoxin, putative                                     |
| 1.1e-41                                                 | 140.6 | 0.0 | 1.3e-41 | 140.3 | 0.0 | 1.1 | 1 | AM1_2940       | alkyl hydroperoxide reductase/ Thiol specific antioxidant protein |
| 1.1e-40                                                 | 137.4 | 0.0 | 1.3e-40 | 137.1 | 0.0 | 1.1 | 1 | AM1_1161       | bacterioferritin comigratory protein                              |
| 1.7e-39                                                 | 133.4 | 0.0 | 2.2e-39 | 133.1 | 0.0 | 1.1 | 1 | AM1_6007       | Alkyl hydroperoxide reductase/Thiol specific antio                |
| 4.1e-38                                                 | 129.0 | 0.0 | 4.8e-38 | 128.8 | 0.0 | 1.0 | 1 | AM1_5436       | bacterioferritin comigratory protein                              |
| 8.9e-35                                                 | 118.2 | 0.1 | 1.2e-34 | 117.9 | 0.0 | 1.2 | 1 | AM1_A0300      | peroxidase/ antioxidant protein                                   |
| 3.2e-32                                                 | 110.0 | 0.0 | 4.4e-32 | 109.5 | 0.0 | 1.2 | 1 | AM1_4173       | redoxin domain protein, putative AhpC/TSA family                  |
| 6.5e-30                                                 | 102.5 | 0.1 | 8.4e-30 | 102.2 | 0.0 | 1.1 | 1 | AM1_5494       | Alkyl hydroperoxide reductase/Thiol specific antioxidant protein  |
| 5.7e-28                                                 | 96.2  | 0.0 | 7e-28   | 96.0  | 0.0 | 1.1 | 1 | AM1_2532       | AhpC/TSA family protein                                           |
| 2.9e-21                                                 | 74.6  | 0.0 | 4.7e-21 | 73.9  | 0.0 | 1.3 | 1 | AM1_4765       | redoxin domain protein, putative AhpC/TSA family                  |
| 5.7e-17                                                 | 60.7  | 0.0 | 6.8e-17 | 60.5  | 0.0 | 1.1 | 1 | AM1_5336       | redoxin domain protein, putative AhpC/TSA family                  |
| 5.8e-15                                                 | 54.2  | 0.0 | 7.6e-15 | 53.8  | 0.0 | 1.1 | 1 | AM1_3680       | peroxiredoxin, putative                                           |
| <b><i>Nostoc punctiforme</i> ATCC 29133 (Complete)</b>  |       |     |         |       |     |     |   |                |                                                                   |
| 3.5e-45                                                 | 151.5 | 0.0 | 4.3e-45 | 151.2 | 0.0 | 1.1 | 1 | Npun_F6082     | alkyl hydroperoxide reductase/ Thiol specific antioxidant protein |
| 5e-42                                                   | 141.3 | 0.0 | 5.9e-42 | 141.1 | 0.0 | 1.1 | 1 | Npun_F2872     | alkyl hydroperoxide reductase/ Thiol specific antioxidant protein |
| 8.9e-41                                                 | 137.3 | 0.1 | 1e-40   | 137.1 | 0.1 | 1.0 | 1 | Npun_R0493     | alkyl hydroperoxide reductase/ Thiol specific antioxidant protein |
| 3.8e-40                                                 | 135.3 | 0.0 | 4.5e-40 | 135.0 | 0.0 | 1.1 | 1 | Npun_R6477     | alkyl hydroperoxide reductase/ Thiol specific antioxidant protein |
| 4.9e-40                                                 | 134.9 | 0.0 | 6e-40   | 134.6 | 0.0 | 1.1 | 1 | Npun_F2425     | alkyl hydroperoxide reductase/ Thiol specific antioxidant protein |
| 6.1e-34                                                 | 115.2 | 0.0 | 8e-34   | 114.8 | 0.0 | 1.2 | 1 | Npun_F6498     | alkyl hydroperoxide reductase/ Thiol specific antioxidant protein |
| 2.7e-28                                                 | 97.0  | 0.0 | 3.2e-28 | 96.7  | 0.0 | 1.1 | 1 | Npun_F6083     | alkyl hydroperoxide reductase/ Thiol specific antioxidant protein |
| 8.4e-23                                                 | 79.2  | 0.2 | 1.1e-22 | 78.8  | 0.1 | 1.2 | 1 | Npun_F2528     | alkyl hydroperoxide reductase/ Thiol specific antioxidant protein |
| 9.6e-21                                                 | 72.6  | 0.0 | 1.2e-20 | 72.3  | 0.0 | 1.1 | 1 | Npun_F6135     | alkyl hydroperoxide reductase/ Thiol specific antioxidant protein |
| 8.5e-15                                                 | 53.4  | 0.0 | 2.2e-13 | 48.8  | 0.0 | 2.1 | 2 | Npun_R4657     | glutaredoxin family protein                                       |
| <b><i>Anabaena variabilis</i> ATCC 29413 (Complete)</b> |       |     |         |       |     |     |   |                |                                                                   |
| 4.6e-47                                                 | 157.4 | 0.0 | 5.8e-47 | 157.0 | 0.0 | 1.1 | 1 | Ava_2024       | Alkyl hydroperoxide reductase/ Thiol specific antioxidant protein |
| 6.3e-43                                                 | 144.0 | 0.0 | 7.6e-43 | 143.7 | 0.0 | 1.1 | 1 | Ava_3881       | Alkyl hydroperoxide reductase/ Thiol specific antioxidant protein |
| 8.5e-42                                                 | 140.4 | 0.1 | 9.8e-42 | 140.2 | 0.0 | 1.0 | 1 | Ava_0194       | Alkyl hydroperoxide reductase/ Thiol specific antioxidant protein |
| 1.2e-41                                                 | 139.9 | 0.0 | 1.4e-41 | 139.7 | 0.0 | 1.1 | 1 | Ava_0435       | Alkyl hydroperoxide reductase/ Thiol specific antioxidant protein |
| 8.4e-41                                                 | 137.1 | 0.0 | 1e-40   | 136.9 | 0.0 | 1.1 | 1 | Ava_0485       | Alkyl hydroperoxide reductase/ Thiol specific antioxidant protein |
| 4.7e-33                                                 | 112.1 | 0.0 | 6.6e-33 | 111.6 | 0.0 | 1.2 | 1 | Ava_1358       | 1-Cys peroxiredoxin                                               |
| 5.6e-27                                                 | 92.5  | 0.0 | 7.4e-27 | 92.1  | 0.0 | 1.1 | 1 | Ava_2023       | putative thiol-specific antioxidant protein                       |
| 1.4e-22                                                 | 78.2  | 0.0 | 1.8e-22 | 77.9  | 0.0 | 1.1 | 1 | Ava_2915       | hypothetical protein                                              |
| 5.8e-20                                                 | 69.8  | 0.0 | 7.1e-20 | 69.5  | 0.0 | 1.1 | 1 | Ava_0627       | hypothetical protein                                              |
| <b><i>Cyanothece</i> sp. ATCC 51142 (Complete)</b>      |       |     |         |       |     |     |   |                |                                                                   |
| 1.8e-42                                                 | 142.5 | 0.0 | 2.2e-42 | 142.1 | 0.0 | 1.1 | 1 | cce_2409       | thioredoxin peroxidase                                            |
| 2.1e-42                                                 | 142.2 | 0.0 | 2.5e-42 | 142.0 | 0.0 | 1.1 | 1 | cce_1296       | bacterioferritin comigratory protein                              |
| 4.3e-42                                                 | 141.2 | 0.1 | 4.9e-42 | 141.0 | 0.1 | 1.0 | 1 | cce_3358       | putative bacterioferritin comigratory protein                     |

|         |       |     |         |       |     |     |   |          |                                             |
|---------|-------|-----|---------|-------|-----|-----|---|----------|---------------------------------------------|
| 9.4e-36 | 120.7 | 0.0 | 1.2e-35 | 120.3 | 0.0 | 1.2 | 1 | cce_0135 | putative rehydrin                           |
| 1.7e-25 | 87.6  | 0.0 | 2.1e-25 | 87.3  | 0.0 | 1.1 | 1 | cce_4124 | putative thiol-specific antioxidant protein |
| 1.4e-24 | 84.7  | 0.0 | 2.1e-24 | 84.1  | 0.0 | 1.3 | 1 | cce_3631 | hypothetical protein                        |
| 1.7e-16 | 58.6  | 0.0 | 2.2e-16 | 58.2  | 0.0 | 1.1 | 1 | cce_3126 | peroxiredoxin                               |

***Thermosynechococcus elongatus* BP-1 (Complete)**

|         |       |     |         |       |     |     |   |         |                                              |
|---------|-------|-----|---------|-------|-----|-----|---|---------|----------------------------------------------|
| 1e-44   | 148.6 | 0.0 | 1.3e-44 | 148.3 | 0.0 | 1.1 | 1 | tll1454 | thioredoxin peroxidase                       |
| 1.3e-43 | 145.1 | 0.0 | 1.5e-43 | 144.8 | 0.0 | 1.1 | 1 | tlr1194 | bacterioferritin comigratory protein         |
| 1.3e-42 | 141.8 | 0.0 | 1.6e-42 | 141.6 | 0.0 | 1.0 | 1 | tlr1198 | bacterioferritin comigratory protein         |
| 6.1e-40 | 133.2 | 0.0 | 7e-40   | 133.0 | 0.0 | 1.0 | 1 | tll1451 | bacterioferritin comigratory protein homolog |
| 4.1e-33 | 111.1 | 0.0 | 9e-33   | 110.0 | 0.0 | 1.5 | 2 | tlr2261 | AhpC/TSA family protein                      |
| 3.1e-25 | 85.7  | 0.0 | 3.9e-25 | 85.4  | 0.0 | 1.1 | 1 | tlr1788 | hypothetical protein                         |
| 1.5e-22 | 77.1  | 0.0 | 1.9e-22 | 76.7  | 0.0 | 1.1 | 1 | tlr1289 | hypothetical protein                         |

***Prochlorococcus marinus* MED4 (In complete)**

|         |       |     |         |       |     |     |   |         |                                                                   |
|---------|-------|-----|---------|-------|-----|-----|---|---------|-------------------------------------------------------------------|
| 5.6e-41 | 136.0 | 0.1 | 1e-40   | 135.2 | 0.0 | 1.5 | 2 | PMM0856 | thioredoxin peroxidase                                            |
| 2.4e-35 | 117.9 | 0.1 | 2.7e-35 | 117.6 | 0.1 | 1.0 | 1 | PMM0079 | putative bacterioferritin comigratory (BCP) protein               |
| 1.1e-34 | 115.8 | 0.0 | 1.3e-34 | 115.5 | 0.0 | 1.1 | 1 | PMM0903 | Alkyl hydroperoxide reductase/ Thiol specific antioxidant protein |
| 2.4e-33 | 111.4 | 0.0 | 2.8e-33 | 111.2 | 0.0 | 1.1 | 1 | PMM0345 | putative bacterioferritin comigratory protein                     |
| 3.6e-10 | 36.5  | 0.0 | 5.4e-10 | 35.9  | 0.0 | 1.2 | 1 | PMM0283 | conserved hypothetical protein                                    |
