# Supplementary material for: Genome-wide analysis of putative peroxiredoxin in unicellular and filamentous cyanobacteria
Source: PubMed Central journal article supplement (PMC3514251; doi:10.1186/1471-2148-12-220), 2012-11-16
Supplement: 1471-2148-12-220-S5.pdf [file 1471-2148-12-220-S5.pdf]

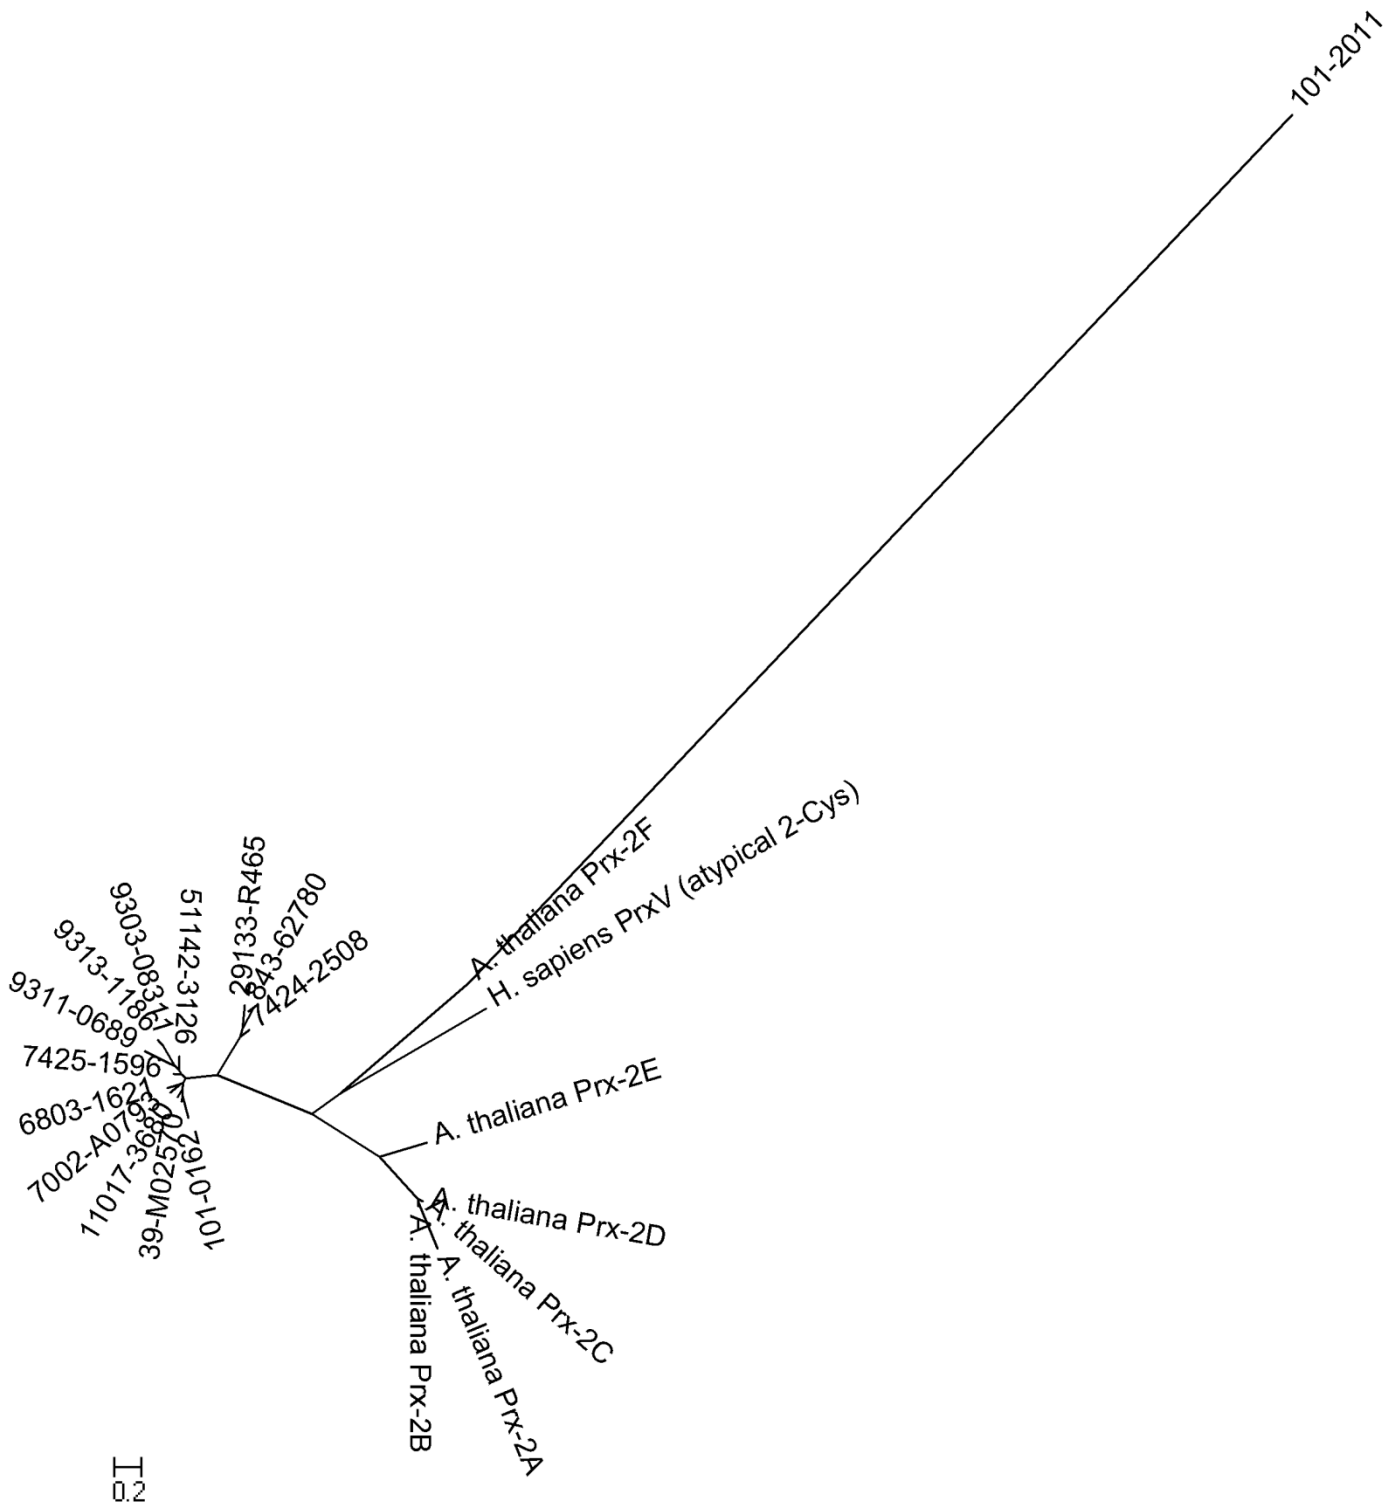

12
