# Supplementary material for: Genome-wide analysis of putative peroxiredoxin in unicellular and filamentous cyanobacteria
Source: PubMed Central journal article supplement (PMC3514251; doi:10.1186/1471-2148-12-220), 2012-11-16
Supplement: 1471-2148-12-220-S7.pdf [file 1471-2148-12-220-S7.pdf]

>ara-1 Arabidopsis thaliana 1-cys

MPGITLGDTVPLEVETTHDKFKLHDYFANSWTVLFSHPGDFTPVCTTELGAMAKYAHEFDKRGVKLLGLSCD  
DVQSHKDWIKDIEAFNHGSKVNYPIIADPNKEIIPQLNMIDPIENGPSRALHIVGPDSKIKLSFLYPSTTGRNMDV  
LRALDSLLMASKHNNKIATPVNWKPDQPVVISPAVSDEEAKMFPQGFKTADLPSKKGYL RHTEVS

>ara-2 Arabidopsis thaliana 2-Cys peroxiredoxin A

MASVASSTLISSPSRVFPAKSSLSVSLRRTLSSPSASASLRSGFARRSSLSSTRRSFAVKAQADDLPLVGNK  
APDFEAEAVFDQEFIKVKLSDYIGKKYVILFFYPLDFTFVCPTEITAFSDRHSEFEKLNTEVLGVSVDVSVFSLAWV  
QTDRKSGGLDNLNYPLISDVTKSISKSGVLHIDQGIALRGLFIIDKEGVIQHSTINNLGIGRSVDETMRTLQALQYI  
QENPDEVCPAGWKPGEKSMKDPKLSKEYFSAI

>ara-3 Arabidopsis thaliana 2-Cys peroxiredoxin B

MSMASIASSSTLLSSSRVLLPSKSSLLSPTVSPRIIPSSSASSSLCSGFSLSLTTNRSASRRNFAVKAQADDP  
LVGNKAPDFEAEAVFDQEFIKVKLSEYIGKKYVILFFYPLDFTFVCPTEITAFSDRYEEFEKLNTEVLGVSVDVSVFSLH  
AWVQTDRKSGGLDNLNYPLVSDITKSISKSGVLIPDQGIALRGLFIIDKEGVIQHSTINNLGIGRSVDETMRTLAL  
QYVQENPDEVCPAGWKPGEKSMKDPKLSKEYFSAI

>ara-4 Arabidopsis thaliana peroxiredoxin Q

MAASSSFTLCNHTTLRTPLRKTLVTKQFSVPTKSSSENFFGSTLTHSSYISPVSSSLKGLIFAKVNGQAAPDF  
TLKDQNGKPVSLKYYKGPVVLYFPADETPGCTKQACAFRDSYEKFKKAGAEVIGISGDDSASHKAFASKYKLP  
YTLLSDEGNKVRKDWGVPDGLFGALPGRQTYVLDKNGVVQLIYNNQFQPEKHIDETLKFLLAA

>ara-6 Arabidopsis thaliana peroxiredoxin-2B

MAPIAVGDVVPDGTISFFDENDQLQTVSVHSLAAGKKVILFGVPGAFTPTCSMKHVPGFIEKAEELKSKGVDDII  
CFSVNDPFLMKAWGKTYPENKHVKFVADGSGEYTHLLGLELDLKDGLGIRSRRFALLLDNLKVTVANLESGGG  
FTVSSADDILEAL

>ara-7 Arabidopsis thaliana peroxiredoxin-2F

MAMSILKLRNLSALRSAANSARIGVSSRGFSKLAEGTDITSAAPGVSLQKARSWDEGVSSKFSTTPLSDIFKGGKV  
VIFGLPGAYTGVCQQHVPSYKSHIDKFKAKGIDSVICVSVNDPFAINGWAEKLGAKDAIEFYGDFDGKFKHSLG  
LDKDLAALLGPRSERWSAYVEDGKVKAVNVEEAPSDFKVTGAEVILGQI

>ara-8 Arabidopsis thaliana peroxiredoxin-2A

MAPIDVGDFVPDGSISFFDDDDQLQTVSVHSLAAGKKVILFGVPGAFTPTCSMNHVNGFIEKAEELKSNVDEI  
ICLSGDDPFMITACSENKHVKFVEDGSGEYIQLLGLELEVKDKGLGVRSRGFALLLDNLKVVVNVGSGGDCSLF  
QLMKMTTTTMSNLPTDLEEIISRVPRKYMRAVRLTCKRWNGMFKSQSFTKMHIGKEEAATRELQRTRMIVM  
MDYN

>ara-9 Arabidopsis thaliana peroxiredoxin-2D

MAPITVGDVVPDGTISFFDENDQLQTVSVHSIAAGKKVILFGVPGAFTPTCSMSHVPFGFIGKAEELKSKGIDEIIC  
FSVNDPVMKAWGKTYQENKHVKFVADGSGEYTHLLGLELDLKDGLGIRSRRFALLLDNLKVTVANVENGGGE  
FTVSSAEDILKAL

>ara-10 Arabidopsis thaliana peroxiredoxin-2E

MATLSVSRFMSSSATVISVAKPLLSPTVSFTAPLSFTRSLAPNLSLKFRNRRTNSASATRSFATTPVTASISVGDK  
LPDSTLSYLDPSTGDVKTVTVSSLTAGKKTILFAVPGAFTPTCSQKHVPGFVSKAGELRSKIDVIACISVNDAFVM  
EAWRKDLGINDEVMLLSDGNGEFTGKLGVELDLRDKPVGLGVRSSRYAILADDGV  
VKVLNLEEGGAFNTSSAEDMLKAL

>ara-11 Arabidopsis thaliana peroxiredoxin-2C

MAPITVGDVVPDGTISFFDENDQLQTVSVHSIAAGKKVILFGVPGAFTPTCSMSHVPFGFIGKAEELKSKGIDEIIC  
FSVNDPVMKAWGKTYPENKHVKFVADGSGEYTHLLGLELDLKDGLGIRSRRFALLLDNLKVTVANVESGGEF  
TVSSAEDILKAL

>ara-12 Homo sapiens PrxI (2-Cys)

MSSGNAKIGH PAPNFKATAVMPDGQFKDISLSDYKGYVVFYPLDFTFVCPT EIIAFSDRAEEFKKLN CQVIGA  
SVDSHFCHLAWVNTPKKQGGGLPMNIPLVSDPKRTIAQDYGV LKADEGISFRGLFIIDDKGILRQITVNDPPCCR  
SVDETLRLVQAFQFTDKHGEVCPAGWKPGSDTIKPDV PKTKEYFSKQK

>ara-13 Homo sapiens PrxII (2-Cys)

MASGNARIGKPAPDFKATAVVDGAFKEVKLSDYKGYV VLFYPLDFTFVCPT EIIAFSNRAEDFRKLGCEVLGVS  
VDSQFNHLAWINTPRKEGGLPLNIPLLDGVDTRR LSEYGV LKTDEGIAYRGLFIIDGKGVLRQITVNDLPVGRSV  
DEALRLVQAFQYTD EHGVEVCPAGWKPGSDTIKPNV DDSKEYFSKH N

>ara-14 Homo sapiens PrxIII (2-Cys)

MAAAVGRLLRASVARHVSAIPWGISATAALRPAACGR TSLTNLLCSGSSQAKLFSTSSSCHAPAVTQHAPYFKGT  
AVVNGEFKDLSDDFKGYLVLFYPLDFTFVCPT EIVAFSDKANEFHDVNCEVVAVSVDSHFSLAWINTPRKN  
GGLGHMNIALLSDLTKQJSRDYGV LLEGSLALRGLFIIDPNGVIKHL SVNDLPVGRSVEETLRLVKAFQYVETHG  
EVC PANWTPDSPTIKPSPAASKEYFQKVNQ

>ara-15 Homo sapiens PrxIV (2-Cys)

MEALPLLAATTPDHGRHRRLLLLPLLLFLLPAGAVQGW ETERPRTREEECHFYAGGQVYPGEASRVSVADHSL  
HLSKAKISK P APYWEGTAVIDG EFKELKLDYRGKYL VFFYPLDFTFVCPT EIIAFGDRLEEFRSINTEVVACSVDS  
QFTHLAWINTPRRQGGLP IRIPLLSDLTHQISKDYGV YLEDSGHTLRGLFIIDDKGILRQITLNDLPVGRSVDETL  
RLVQAFQYTDKHGEVCPAGWKPGSETIIPDAGK LKYFDKLN

>ara-16 Homo sapiens PrxV (atypical 2-Cys)

MGLAGVCALRRSAGYILVGGAGGQSAAAAARRCSEGEWASGGVRSFSRAAAAMAPIKVGDAIPAVEVFEGEP  
GNKVNLAELFKGKGVLFVPGAFTPGCSKTHLPGFVEQAEAL KAKGVQVVA CLSVNDAFVTGEWGRAHKA E  
GKVRLLADPTGAFGKETDLLLDDSLVSIFGNRR LKRFSMVVQDGIVKALNVEPDGTGLTCSLAPNIISQL

>ara-17 Homo sapiens PrxVI (1-Cys)

MPGGLLLGDVAPNFEANTTVGRIRFHD FLGDSW GILFSHP R DFTPVCTTELGRAAKLAPEFAKRNVKLI ALSIDS  
VEDHLAWSKDINAYNCEEPTEKLPFPIIDDRNRELA ILLGMLDPAEKDEKGMPTARVVFVFGPKK LKLSILYPA  
TTGRNFDEILRVVISLQLTAEKRVATPVDWKDGDSVMV LPTIPEEEAKKLPKGVFTKELPSGKKYLRYTPQ P

>11017-2940

MKPLRHHLTRICLVGLIVSLVMAAPAFAMGGDPP LDQPAPTF TLPSNTGDGEVLS D YRGQWV VLYFYPQ  
DFTPGCTVEAQR FQQLPKYIERNTQVIGVSVDSV DSHA EFC DSEGLKFLLADEDGSVSKAYGSWMSYFSLRH  
TYLIDPEGILREQYVKVRPVIHSEEVLARLDELQAAS

>11017-1161

MTLDIGDYAPEFTLPNADGESIDLKRFRGQWV VLYFYPRDNTPGCTKEACGFRDQYETYQTEQV VILGVSGDD  
AKSHQKFINKQNL PFQLLSDLDFNVAKS YEAYGPKKFMGKEYEGIYRHSFLIDPDGKLAKIYRKVKAADHATDVL  
QDLELLRK

>11017-5436

MALTAGTAAPAF TTKDTNGNTVSLADYAGKTVVLYFYPKDDTPGCTKEACSF RDNYTAYQGKDIVVFGVSGDDE  
GSHQDFTSKFNLPFLLADVDHSLMKAYDVG GGYAQRVTVINGQQQIDKVYTSVNTDTHATDILADLGL

>11017-6007

MVHPLGLYNWDEISLIALGEEQKSHIQTKSMAIKVGN SVPDVTLQTPTGETVSLKNFLG EKIVVLYFYPKDDTPG  
CTKEACGFRDSYTVFQEAGA EVIGVSN DTPNSHQQFANKYQLPFTLLSDGANQARKAFGVPSTLGLLPGRVTV  
VIDTDGVVRHIFNSQLNFQGHIDESL KIVQSLTKDA

>11017-2698

MSQHEAHECLRVGQAAPDFTATAVYDQEFSEVKLSNYR GKYV VIFFYPLDFTFVCPT EITAFSDRYDAFKDLNTE  
VLGISVDSEFSLAWTQTDRKSGGVGDLNYP LVS DIKKEISTAYNVLD PDAGVALRGLFIIDKEGVVQHATINLA

FGRNVDETLRTLQAIQHVQSHQDEVCWQPGDKTMNPDVKSQVYFESV

>11017-A0300

MTLQLGDTVNFQKTEGDLNFYDWAGDSWVFLSHPADYTPVCTTELGSVAKLKSEFASRNAKVIASVDD  
VNSHKGWINDINETQNTVVNYPIADADQTVANLYGMIHPNANAKVTRTVFVIDPKKLRLLTYPPSTGRNN  
EILRVLDSLQLTDNYSVATPVDWTDGDDVVVAPSISTADAKQKFKPGVNEIKPYLRMTPQPNR

>11017-4173

MSLATELQAVTENVRQQAPENVFTTMEAATAKLAATGITDQALQGTQMPDFELPDATGKSVSSELRAKGLL  
ISFYRGNWCPCYCNLELQALQARLDDIAALGATLVAISPESPDQSLTTQEKFDLKFVLTDTGNQVARQFGLVFTLD  
ESLRPIYNNFGIDITTHNGDQSFELVPATYLVAAAGTVLNHFVDVYRERLAPETALAWLQAAQ

>11017-5494

MSLRLGDTVNFQDSTAGTIDFFEWAGDSWVFLSHPADYTPVCTTELGSVSKLKPEFDKRHVKTIALSVDDA  
QAHNGWIGDINETQNTTVDPILADADKKVSDLYDMIHPNANAKVTRTVFIIDNNKKLRASITYPPSTGRNFN  
EILRVIDSLQLTDNYQVATPVDWQDGDVVVAPTIPTEEAKQKFKPGVTEIKPYLRMTPQPNK

>11017-2532

MTQSSGFFNQRYVNNFVPLPGKGEPAVGRAPDFELPRIGGDSVKLSDYRGQQPIFLAFTRIFTEKLCFPCYPHI  
QDLKQRYSEIVDRGAELLMISSTDQVQSEQIVSDLDLPYPFLYNPKCESFRNYGAGQALGAPLPAQYIVDVGTI  
RFRHMFVFDHNAAGMDEVLTILEGLIPQG

>11017-5336

MMTFAQSTSPKLLMGHTAPLLVQTLDHGLWRLADQTPHYTMVVFYRGLHCPVCEQYLTELDQKLSAFAQL  
GVQVIALSGDGDKTQQLKTQANLQQLSLGYLTPQMRDWGLYLSQGHFEQEPALFSEPAVFLIQPDGRLYFA  
NIGTHPFSRIDFDSLLAGLAYVIPNNYPLRGTA

>11017-4765

MVLTASTMLDLGTPAPNFQLPDVVSQQTISLETFAHRNVLLVMFICQHCPVFKHVQAEALQIGHDYSDQSLGIV  
AISSNDIQSHPLDDPEHLTAMATSLGYNFPICFDEHQDVAKQYTAACPDDFFVDAHRKLVYRGQLDDSRPSNN  
LMVTGEDLRGALDAALAEQPISANQKPSIGCNKWKPGNEPAYYG

>11017-3680

MAVFATERVPDVVFKTRVRDESVPGNPYRWQDKTTQDIFGGKRVVFLSLPGAFTPTCSSTHLPRYEELHEEIK  
AQGVDEIICLSVNDAFVMFQWKGKHQGADKVFLLPDGNGEFTRKMGMLVDKSNLGFGMRSWRYSMVVNN  
GQIEKMFIEADYDNCPTDPFEVSDADTMLAYLKGVHATAAAPTAAAVG

>11017-3814

MSFFQPQRRKLLSLLGLGAASAVGAALLPRSQNRSVTAFETPSNTSLWTKRDDVNLGQPLHPFQGISHWLNSE  
PLSIADLKGKVVLVQFWTFGCINSQRTLPHYVTRWHQQYADQGLQVIGIHTPEFKYEHAASNVQKALAEYQIAYP  
VPLDNNYQTWKAYRNRYWPHLFLTNREGVITYHHIGEGAYQETEQTQALLG

>7120-2556

MISRRNFLHILLVSCFAVISWLNLPPTAYALGGKLPINQAPDFTLPTNTGDGKLSLGDRLGKVVLYFYPKDF  
SGCTIEARRFQDLPTYLDKNVQIIGVSADDIDSHAFCDEGLKFPLLADTDGAVSKAYGSWIGYVSMRHSFIID  
PQGILRETFVKVNPVHSTEVLARLEKLQSTAS

>7120-2503

MSNIPQAGQPAPDFSTPDQNGNLVSLNDFQGGQWVVIYFYPKDDTPGCTTEAKDFTGLHQEFNQLGAKILGVS  
PDSGKAHCKFIDKHNSINLLSDPEHQLIEAYGAWRLKKFMGKEYMGVARSTFLISTDGIAYAWPNVKTGHA  
QAVLNKLQELINS

>7120-2375

MPLAVGTDAPAFTVKDTNGNTVSLSDFAGKTVVLYFYPKDDTPGCTKQACSFRAQSDYKNKDVVVLGVSAD  
DEGSHQAFQKYNLNFPLADTNKTLISAYDVGDDGGYAKRVTVYIGPDGKIVHDASVNTTTHAGDVLAAALGL

>7120-3183

MPVKVGDSAPDFTLPAQNGSSVLSDFRGGKAVVLYFYPKDDTPGCTAESCAFRDRYEVFQTAGAEIIGVSGDS  
NESHQKFASKYNLPFTLLSDKGDQVRKLYGATAAFGLFPGRVTTYVIDQQGVVQYVFDMSFNFQGHVEEALKTL  
QQLASK

>7120-4641

MSITYGTQESLRVGGQAPDFTATAVVDQEFKTIKLSYRGKYVVLFFYPLDFTFVCPEITAFSDRYEEFKLNTEIL  
GVSVDSEFSLAWIQTDKRSKGGVLDNYPLVSDIKKEVSDAYNVLDPAAGIALRGLFIIDKDGIIQHATINNLAFG  
RSVDETLRTLQAIQYVQSHPDEVCPAGWQPGEKTMTPDPVSKVYFAAV

>7120-4404

MALRLGDTVNFQASTHGDIDFYAWAGDSWVVLFSHPADYTPVCTTELGTVAKLKPEFDKRNKAIALSVD  
VESHNWVGDIEETQSTTLNYPILADADRKVSVDLYDMIHPNANAAVTVRSVVIDPNKKLRLTFTYPPSTGRNF  
DELLRVIDSLQLTDNYSVATPADWKDGDKVVIVPSLKDPEVLKEKFPKGYEVVKPYLRLTPQPNK

>7120-4642

MNADRHRYSKISVNSGVHLWFYHCIIYQLVDNFERFMLTSTDFSGLLNERFFRNFLPIPASNELRLDVGTPDFQLP  
DITNGTLVKLSNYRGKQPILLAFTRIFTEKQYCPFCFPHIKALNENYEQFTNRGIEVLLVTSTDEKQSQIVVKDLGLK  
MPLLSDPSCRAFRTYQVGQALGAPLPAQFVLDKDGRLRYKHLFSFFDHNASVEKLLGKFD

>7120-0513

MALTASTMVPIGTQAPDFHLPDVVSGKTISLSTFADKALLVMFICRHCPVFKHIQDELTRIGQDYSTSDLGIVAIS  
ANDAKNYPDDAPESLKALAIELGWQFPFCYDETQETAKAYTAACTPDDFFVSDRQLAYRGQLDDSRPSNGKP  
VTGADLRAAIDAVLAGKPVIGEQQPSIGCNKWKPTP

>7120-1206

MTILETSNTPVGGYAPDFELPGIDNQVHLSRYLDNFRAVGVVSLGNYCSYVNLVLDRLKGIQGEFGTDGFILIGI  
NASDITEPSWSSLEKMKAFQAQNHENLFPYLWDSTQEVSRSGFATKTPIAFLIDSHGILRYRGQIDNHPQEPSSVG  
EDYLRNAIAALFKGEEILVPETEPVGTSLIWRI

>29413-0485

MISRRNFLHILLVSCFAVISWLNFAPTAYALGGKLPAINQPAPDFTLPTNTGDGKLSLADFRGKWVLYFYPKDFT  
SGCTIEARRFQQDLPTYVDKNVQIIGVSADDIDSHAFCDEGLKFPLLADTDGAVSKAYGSWIGFVSMRHSFII  
DPQGILRETFVKVNPVHSTEVRLARLEKLQSAAS

>29413-0435

MSNFPQAGQPAPDFSTPDQNGNLVSLNDFHGQWVVIYFYPKDDTPGCTTEAKDFTGLHEEFHRLGAKILGVS  
PDSGKAHCKFIDKHNSITLLSDPEHQIEAYGAWRLKFKMGKEYMGVARSTFLISTDGIAYTPNVKTKGHAQ  
AVLNKLQELTNS

>29413-0194

MPLAVGTDAPAFTVKDTNGNTVLSDFAGKTVVLYFYPKDDTPGCTKQACSFDAQSDYKNKDVVVLGVSAD  
DEGSHQAFTQKYNLNFLLADTNKTLISAYDVDGGGYAKRVTVVIGPDGKIVHVDASVNTTTHASDVLAALGL

>29413-3881

MPVKVGDSAPDFTLPAQNGSSVLSDFRGGKAVVLYFYPKDDTPGCTAESCAFRDRYEVFQTAGAEIIGVSGDS  
NESHQKFASKYNLPFTLLSDKGDQVRKLYGATAAFGLFPGRVTTYVIDQQGVVQYVFDMSFNFQGHVEEALKTLQ  
QLANK

>29413-2024

MSITYGTQESLRVGGQAPDFTATAVVDQEFKTIKLSYRGKYVVLFFYPLDFTFVCPEITAFSDRYEEFKLNTEIL  
GVSVDSEFSLAWIQTDKRSKGGVLDNYPLVSDIKKEVSDAYNVLDPAAGIALRGLFIIDKDGIIQHATINNLAFG  
RSVDETLRTLQAIQYVQSHPDEVCPAGWQPGEKTMTPDPVSKVYFAAV

>29413-1358

MALRLGDTVPNFTQASTHGDI DFYEWAGDSWVVLFSHPADYTPVCTTELGTVAKLKPEFDKRNVKAIALSVD  
VESHKGWVGDIEETQSTTLNYPILADADRKVS DLYDMIHPNANA AVTVRSV FVIDPNKKLRLSFTYPPSTGRNF  
DELLRVIDSLQ LTDNYSVATPADWKDGD KVVIVPSLKDPEVLKEKFPKGYEVVKPYLR LTPQPNK  
>29413-2023

MLTSTDFSGLLNERFFRNFLPIPASNELRLDVGTPDFQLPDITNGTLVKLSNYRGKQPVLLAFTRIFTEKQYCPFCF  
PHIKALNENYEQFTNRGIEVLLVTSTDEKQSQIVVKDLSLKMPLLSDPSCRTFRTYQVGGALGAPLPAQFVLDKD  
GRLRYKHLFSFFDHNASIEKLEKFD  
>29413-2915

MALTASIMVPIGTQAPDFHLPDVVSGKTISLSTFADKKALLVMFICRHCPVVKHIQDELTRIGQDYATRD LGIVAIS  
ANDAENYPDDAPESLKALAIELGWQFPFCYDEQETAKAYTA ACTPDDFFVDDHRHLAYRGQLDDSRPSNGKP  
VTGADLRAAIDAVLAGKPVIDEQKPSVGCNIKWKSTP  
>29413-0627

MTILETSNTPVGGYAPDFELPGIDNHVHLSRYLDNFRVGVVSLGNHCPYVNL YLDR LKAIQGEFGAEGFILIGI  
NASDITEPSWSSLEKMKAFANHKLNFYLDWSTQEVSRSFGATKTPIAFLIDSHGILRYRGQIDNHPQEPSSVG  
EDYLRNAIAALFKGEEIPVPEPEVGTSLIWHI  
>39-L02380

MLRRTLISLIVGIAIALFNLNLASPV LALGGQLPPLNEPAPEFTLPTNTGDGEVSLSDYRGQWVVVYFYPKDFTPG  
CTLEARRFQEDLPKYMARN TQILGISADDVDSHA EFC DSEGLKFLLADVDG SVSKAYG SWLNFFSMRHSFIIDP  
DGILRETFVGVIPAIHSQEVLARLDEMINS  
>39-E01510

MALSAGTKAPAFTAKDTNGNTVSLSDFAGKT VVLYFYPKDDTPGCTKEAQ SFRDNYENYQSRDMVVLGVST  
DEASHKLFTEKYGLPFQLLADTDGAIKAYDV DGGGYAKRVTYIINGEGVIDHVDDKVNTSTHAQDILAKVN  
>39-O06760

MSLNVGDLAPDFTLS DQDGNLISLSQFRRQTVVLYFYPRDHTPGCTKEACGFRDVYADYQGN NIIVLGISTDDP  
KSHTKFINKYHLPFLLCDPDGKVATLYHSYGLK KFMGREFMGIYRQTFIINPDGYIHKIYKVKPESHAILQDLS  
GEG  
>39-A03490

MPVQVGD LAPDFTLTSQTGESVSLKDFRGNKAVVLYFYPKDDTPGCTAEACAFRDSYTFQETGAEVIGVSADSP  
DEHQKFVGGKYNLPFTLLSDQGNQVRKLYGVPATLWILPGRVTVYIDNQG VVRHIFDSMLDFKGHVDEALKTLRS  
MSAV  
>39-M00250

MTSECIRVGLAAPDFAATAVIDQEFKTIKLE YRGKYVVLFFYPLDFTFVCPEITAFSDRAEEFSAINTQILGVSVD  
EFSHLAWIQSDRQSGGVGDLNYPVLS DIKKEISAAYNVLDPEAGIALRGLFIIDKGGIIQHATINNLAFGRNVDET  
RTLQAIQYVQANPDEVCPAGWQPGDKTMNPD PVKSKEFFAAI  
>39-E02230

MVHSTSILTVGDPAPWFSLPDSNGKNIVLRSHAGK PILLVFYAGDQISECEK IACRLQDIMSLCDRFDLQIFSISLN  
PPSTRKTF AENHHLNYSLLSDFKGEVSTKYGAYICDGKNSNTIVYNRVAFLLDRNLRLIKIYPLHPLEEFTQKFLGEI  
QDLVAQEPPRIKMQAPVLLIPKVLDR  
>39-F00560

MTLRLGDTVPNFTQSSSEGEINFYDWAGDSWVVLFSHPADYTPVCTTELGTVAKLKPEFDKRNVKVIALSVDDA  
DSHKGWIGDINETQQTNI NYPILADSDRQVSDLYDMIHPNANASLTVRTVFVIDSNKKLRLTLTYPPSTGRNFSEI  
LRVIDSLQ LTDNYSVATPADWQDGEDCVIVPSLKDPEELKQKFPKGYKEIKPYLRMTPQPNK  
>39-J00990

MMLTSNDFSGLLNQRFFRNFLPIPAAGTLHLGKKTDFELPDITNNGKVRLSEYRGNTPVILAFTRIFTEKQYCP

CYPHIKALNENYRAFVERGAEILMITSTDTAQSQTVVKDLGLKMPLLSDSSCGIFRLYHVGQALGAPLPAQFVLD  
REGILQYRHLFSFLEPNATVPKLLSILDELAN

>39-Q00510

MALTASTMLSLGTIAPDFQLPDVTSGEIISVDTFKDKKALLVMFICCHCPFVKHIENELAKLGHDYQPLGIGIVAIS  
ANSIKTHPQDGPHELKNAETVGFSPYCYDETQEVAQAYTAACPDDFFLNSDRQLVYRGQLDDSRPGNNLP  
VTGADLRAALDAILADQPINSQKPSIGCNIKWHPQ

>39-C03410

MKGTILINSYAPDFELPGVDDEVHHLARYLQKFQVIVIFMNSNCPYVQSYVGRMKALQTYLQTVIATVGINAN  
DPLQSPDSFEQMKIFAQDHDLNFPYIRDVTQDVAHCFGAETTPFAFVLDNQILRYRGGLDDNPESPEAVTIN  
YLKNAVSQLLASVAIAPETTPPIGSPIQWRR

>39-M02570

MVIEKVPDVVFKTRVRDESVEGPNPFRWQDRTTQEIFGGKRVVVFSLPGAFTPTCSSTHLPRYEELYDEIKAQGI  
DEIVCVSNDAFVMFQWGKQGGADKVLLPDGNGEFTRKMGMLVDKSNLFGMRSWRYSMVVNDGKIEK  
IFVEPDFGDNCPDPEVSDADTMLAYLKG

>51142-1296

MLRRQILAILLAIIVIFSGTQTPALALGGPQPPLNESAPNFTLPTNTGDGEISLSDYRGQWVVLVYFYPQDFTPGCL  
EARRFQQLPKYEAKNTQILGVSVDVNSHREFCDAEGLKFLLADTTGEVSKTYGSFLTGMSLRHTYLIDPDGL  
REKFLGVRPAIHSQEVLAYLDEVNSNH

>51142-3358

MALAVGTVPDFTTVDDEGNTVSLSDYKGVVVLVYFYPKDDTPGCTKEAQFRDNYQQYQDKDMVVFVSM  
DDQASHKAFKEYGLPFQLLVKDGKLTAKYDVEGGGYSKRVTYIINGEGKISYVDEKVKTDTHAQDILGVAG

>51142-2409

MTIEGCLRVGQVAPDFTATVVIDQEFQTKLSSYRGKYVVLFFYPLDFTFVCPTEVIAFSDRYEEFAKINTEILAVSV  
DSEFSLAWIQTPRTEGGVGDIAIYPLVSDLKEISTAYNILDPESGVALRGLFIIDKEGVIQHATINNLFSGRSVTEL  
RTLKAIQHVQTNPEEVCADWQEGDKTMIPDPIKSIYFSAV

>51142-0135

MALQLGDTVDPDFTQETSEGTISFHEWAGDSWVVLFSHPADYTPVCTTELGTVASLKPEFDKRNKILALSVDV  
DSHKGWINDINETQNTNVNYPHAIADPDRKVADLYGMIHPNSLNLTVRSVFIIDPNKKLRLTLTPASTGRNFDEI  
LRVIDSLQLTDYHQVATPANWKDGDCCVVVPSISTEEAKQKFPKGVTEVKPYLRMTPQPNK

>51142-4124

MMLTSTDFTGLINQRFFNNFLPIPATNQLLLGSIAPDFILPDITNNRMLRLGDYFHQQPVILAFTRIFTEKQYCPFC  
YPHIVSLNKYYEQFVERGVDVLMITSTDQTSQIVVRDLGLKMPLLSNPDCQVFRKYHTGQALGAPLPAQFVLD  
KTGTIQYKHLFSFMDHNASVDQLLKIS

>51142-3126

MGAIETVPSVVFKTRVRDESVPGNPYRWQDLTSEEIFKGKKVIVFSLPGAFTPTCSSNHLPRYEELYDEFKALGV  
DEVICISVNDAFVTFQWGKQEAKNVLLPDGNGEFTRKMGMLVDKSNLFGMRSWRYSMLVNDCKIEKM  
FVEPGYEDNCPDPEVSDADTMLAYLKGTESSGVSEPVKAFVG

>51142-3631

MLMVKTLSTMLPLGKAPNFSLEDVVSGKKISLDTFADKKALLVMFICVHCPFVKHLQDALAALGKEYVDKGLGI  
VAISANDITTHPDDSPHEMKMAETLGLNFPFCYDESQEVAKAYTAACPDDFFLDRDNLVYRGQFDDSRPG  
NDVPITGKDLKAAIEDVLRDRKVDVDTQQKPSIGCNIKWKAGNEPPYFGA

>7424-2927

MFGRRVLSLFLAFLGLTVLWFNTTYTAAALGGAQPPLNQAPQFTLPTNTGDGEISLSDYHGKWWVLYFYPQDF  
TPGCTLEARRFQEDLAKFEAKNAQIIGVSADDINSHAFCDESEGLKFLLADTTGKVKAYGSWLGSMRLRHTYL

IDPDGNLRDIFLGVRPAIHSAEVLARLDELQQNS

>7424-4280

MSNLPQIGEKVPNFTGKNQEGILVSLADFSSHWLVLYFYPKDNTPGCTTEAIDFSQFLGEFTALGAKILGVSPDSE  
KSHGKFIKHNLSIQLLSDPDHQVAEAYGVWGLKFKMGKEYMGIIRSTFLIDPDGKLVYTPNVRVKGHAEAVL  
KKLEEVN

>7424-3638

MALAVGTEAPNFTTVNDEGKTVLSDFGKVVVLYFYPKDDTPGCTKEAQSFDRDNYQEYQTKDMVVVLGVSM  
DQASHKQFKEKYGLPFNLLVDTDGAITKAYDVEGGGYSKRVTYIIDAEKIMYVDEKVKTDSHAKDILSTVG

>7424-5046

MSVKVGDRAFDFTLSSQSGEKVSLKDFLGKAVVYFYPKDDTPGCTAESCAFRDSYEVFKEMGAEVIGISGDS  
PDSHKSFAKYNLPFILLSDTNMQVRKLFVLPGRVYIIDKEGIIQIFDSAFDFKAHVNEALKTLQGVK

>7424-0090

MEGCLRVGQNAPDFTATAVVDQEFKTIKLSDYRGKYVVLFFYPLDFTFVCPTETIAFSDRYEEFKINTEVLGVSV  
SEFSLAWIQTRKSGGIGDIAYPLVSDIKKEISTAYNVLDPEAGVALRGLFIIDKEGVIQHSTINNSLFGRSVDETL  
RTLKAIQYVQTHPDEVCPAGWQEGDKTMNPDVAKVYFASV

>7424-0397

MALQLGDTVDPDFTQESSEGTISFHEWAGDSWVLFVSHPADYTPVCTTELGTVANLKEPDKRNVKVLALSVD  
VESHKGWINDINETQKTTVNYPIADPDRKVADLYGMLHPNSLTNLTVRSVFIIDPNKKLRLTITYPASTGRNFDEI  
LRVIDSLQLTDNYQVATPANWKDGEDCVVPSIPTEEAKQKFPKGVTEVKPYLRMTPQPNK

>7424-1402

MTANSGLFNRRFAQNFILPGFNVPSVGLAPNFTLPQVGGNIIQLSDYRGQKSVILAFTRIAATEKLFPCYCYPHIL  
ELKERYEEICDRGSELLMITSTDSIQSQEIVKNLRLPYPFLYDPECKIFRRYGAGQALGVPLPAQFIINLEGRITYRHL  
FSFIDGHASTDTILNQLDQL

>7424-4031

MALTQSTMLTLGTTAPDFQLPDVVSGQTISLKNFEDKQALLIMFICQHCPFVKHIKQELANLGQDYVPKGLGIIAI  
SANDVANYPSPENLKAMAQEFNFPCYDETQETAKTYTACTPDDFFLSDRKLVRGQLDDSRPSNNLP  
VTGKDLRAAIENILAGKPVNSDQKPSIGCNKWKPGHEPSY

>7424-2508

MLPNREGQKVPDAKFRLRVNNNEWVDKTTDDLDFAGKTVVVFSLPGAFTPTCSSTHLPGYNDLAPVFKDNGVDD  
ILCISVNDAFVMNEWAKDLNANNVTLPDNGGEFSEGMGLVLDKSDLGFGKRSWRYSMLVKDKTIEKMFIEP  
EEPDPFKVSDADTMLNYINPSAKKPPVTMFTKVGCPFCTRAKNMLQEKIEYEEIPLSKVTTKLSAVSGAK  
TTPQVFIGGQLIGGSEALEEYLKTHY

>7425-2289

MSFSFRRRFLLLACFLSLSLLLALPALALGGDLPLNQPAPPFALPTNSGTGTVTLDDYRGQWVVVYFYPKDFTS  
GCTLEAQRFRDLAQYQTRNTQIIGISADSVQSHAFCDESEGLKFPLLADTTGRVSQAYGSWLGFMMSMRHSFIV  
DPQGILRERFVKVNPANHSTEVLARLDELQQFL

>7425-1511

MTLNPGDSAPDFTLADASGNLVSLAALRGKWWVILYFYPDRDNTPGCTKEACGFREIYGELQQKNVLLGVSGDD  
ARAHQKFAQKYDLPFLLCDPEALVAKAYESYGPKKFMGKELQGIYRQTFILDPEGKIARIYRKKVDPHPAEVLA  
ELDELLASEAQA

>7425-3716

MAVKVGDRAFDFTLPSSSGANVSLADFIGKPPVLYFYPKDETPGCTAQAQACTFRDEYAVFQDLGAEVLGVSSDS  
VEAHKKFIANHRLPFQLLSDTGAQLRKLYGVPATLGLPGRVYIIDQAGIVRHIFNSQMNFKGHIEEIAALKQLQ  
TA

>7425-5136

MALAVGTMAPTFTVKDTNGNTVSLADFAGKTVILYFYPKDDTPGCTKEACSFDRDNYTAYQGKDLVVLGVSMDD  
EASHQAFTQKFNLFPFLADVDGAITGAYQVAGEKNGFRYAQRVTVVVDGTGKISHVYDSVKTDTHATDILADL  
GY

>7425-0928

MTHYECLRVGQPAPDFTATAVFDQEFKTIKLSDYRGKYVVLFFYPLDFTFVCPTEITAFSDRYSEFSSINTEILGVSV  
DSEFSLAWTQTDRKSGGVGDLNYPVLSDIKKEISAAYNVLTEGGISLRGLFIIDKDGVIQHATINNLAFGRSVDDE  
LRTLQAIQYVQSHPDEVCPAGWKPGKTMNPDVSKVYFSAV

>7425-0215

MPLRLGDQVPNFTQASSTGEINFYDWAGDSWVVLFSHPKDYTPVCTTELGVVARLKPEFDKRNVKALALSVDDE  
VESHLGWIKDIEETQNVTLNYPVLADGDKKVSLEYDMIHPNSSTGNTLTVRSVFIIDSQKKLRLTFTYPASTGRNF  
DELLRVIDSLQLTDNYSVATPANWADGGDCVIVPSVSDEEAKQKFKPGFNAVKPYLRLTPQPNK

>7425-4300

MGLRIPTLSSSNFTGLVNDRFWKNFLPIPATNQMEIGSATPDFELPDVTHNQNLRLSNLYRQQPVVLAFTTRIFTE  
HQYCPLCLPHIKALNEAYPQFQQQGVVLLITSTDQLQSQKVVDLQLNLPLLSNPSCDVFRRYGTGQALGAPLP  
AQFVIDTQGKLRFKHLFSFFDNNASITLLQALAS

>7425-0955

MARTESTMLPLGTIAPDFQLPDVVTGKTISLDSFIGQKALLVMFICRHCPYVKHVQVELARLGQDYLDQGVGIV  
AISANDADKYPNDAPESLKQMAEELDFNPLCFDQTQSTAKVYTAACPDDFFLDADRKLAYRGLDDSRPSSD  
RPVTGKDLRAALDVTVAGGVPDPDQKPSLGCNIKWKPGNEPAYG

>7425-1596

MAVIERVPNVTFKTRVRDESVPGNPYRWQDLTTEDIFKGKVVVFSPLGAFTPTCSSNHLPRYEELYEEFQAQ  
GVDQIICISVNDAFVMFQWGWKHHGAKNVLLPDGNGEFTRKMGMMLVDKSNLGFMRSWRYSMLVDDCKIEK  
IFIESEFGDNCPIDPFEVSDADTMLAYLKGSESAGVSTPRLAFVG

>8801-1115

MVSIMSRRLFKWLLALCLTLFSSSLITPALALGGTQPPLNEPAPEFTLPTNSGEGEISLSDYRGQWVVLVYFYPKD  
FTPCTLEAKRFQDLPKYQERNAQILGVSVDVDSHAFCDESEGLKFLLADTTGKVKTYGSFLTGMSLRHTY  
LIDPNGILRERFLGVIPAIHSAEVLEKLELDELISLLEVRFFIT

>8801-3492

MSNFPKIGEPAPNFAAKNQKGETVSLDFNAQWLVLVYFYPKDNTPGCTTEAIDFTHHQAEFDALGATIIGVSPD  
SEKSHCKFIEKHLSLQLISDEDHQVAEAYGVWGLKFKFMGKEYMGIIRSTFLIDPDGKVAETWTKVKVKNHVEG  
VLNKLQELKGNSQQTLGYP

>8801-1631

MALAVGTVPNFTTVDDGKTVSLSDFKGKVVVLYFYPKDDTPGCTKEAQSFRDNYEQYKGDMMVVLGVSMDD  
DQTSHKQFKEKYGLPFQLLVDTGTLTKAYDVDGGGYSKRVTYIIDEEGKISYVDDKVQTATHAQDILSIVG

>8801-1491

MTTQGLRVGQLAPDFTATAVIDQEFQTKKLSGYRGKYVVLFFYPLDFTFVCPTEITAFSDRYEEFTKINTEVLGVS  
VDSEFSLAWIQDRKEGGVGDVAYPLVSDIKREISIAYNVLDPDAGVALRGLFIIDKEGYIQHSTINNLFSGRSVD  
ETLRTLKAIQYVQSHPDEVCPAGWEEDRTMIPDPVKAKVYFSAI

>8801-4218

MALQLGDVVPDFTQESSQGTISFHEWAGDSWVVLFSHPADYTPVCTTELGAVASLKSEFDKRNVKVLALSVDSD  
VESHRGWINDINETQNTTVNYPILADADKKVADLYGMIHPNSLNNLTVRSVFIIDPNKKLRLTITYPASTGRNFDE  
ILRVIDSLQLTDYHQVATPVNWKDGDCCVVVPSISTEEAKQKFKPGVTEIKPYLRMTPQPNK

>8801-3616



MMLTSTDFGLINRRFFQNFLPIPASNSLALGVSAPDFSLPDITNNRTVKLSDYRNQQPIVLAFTTRIFTEKQYCPFC  
YPHIINLNQNYERFIEQGIEVLMITSTDAKQSQIVVRDLGLKMPLLSNPDCRVFRRYHTGQALGAPLPAQFVLDK  
TGKIYKHLFSFFDHNAKFDKLLKFL

>8801-4240

MVLTPSTMLPLGKAPNFQLPDVVSEKTISLETFANKKAILVMFICQHCPFVKHIQTQLAKLGHDYVDKGLGIVAI  
SANDVANYPDDSPSNLKKMAQELGFNFPVCYDESQEIAKAYTAACTPDDFFLDGDYQLVYRGQLDDSRPGNNI  
PVTGKDLRIAIDAILGGNSITIEQKPSIGCNIKWKAGNEPPYYG

>7421-3389

MRKLLLKSSLLFALLLAGPQAALLAAPRVGEAAPAFELPVAAGKKISLKDFQGKWLVLVYFYPKDMTSGCTIEAQR  
QKDLAQYKQLGAEIVGVSADALDSHSMFSKKEGLTFLASDVGGKVAQAYDSWYGLGDMGMAARNTYLIDPQ  
GRVAKVFSNVDPTGHSREVLSTLKQIQAKAQR

>7421-2376

MSEPLNVGDPAPEFAAEQTSGERLSLADLRGKVVLYFYPRDNTPGCTKEACALRDYARLQAAGVTVVGVST  
DGVRSHQKFTEKALP FALLADTEGAIQAYGAWGEKKFMGRTSIGILRHTTVIDEAGRIAHYRKKVPEEHADQ  
ILRDLGIAFEA

>7421-2375

MALNVGDKAPDFTAKDTHGNTVSLASLAGKKFVLYFYPKDDTPGCTKEACSRDNWSTYQAQGLGVYGVSM  
DDEASHQAFTSKYALPFP LLADTDGTLAKAYDADAGNYAKRITYVIDEAGKIAQVFTSVNSASHASDVLAAVGV

>7421-0506

MAIEVGRPAPDFTLDGSQGPVTL SQYRGKNNVLLAFYPGDFTPVCTKELTCFVEDWSKFQGKDTVILGISSGSV  
DSKSKFAQSLGAQFP LLSDGEKRVAGLYDVSGLGVARAYFIVDKQGV LRYKHVEALPFFKREDEELLGVLAEL

>7421-3158

MTASVGLPAPSFTLKSTKGATSPKNLGEPIALTDYRGKWLIFFFYPLDFTFVCPTEILALS DRYEEFQDL DTEVLGCS  
CDSVFSHWAWISTPREKNGIAGLKFP L VADFTKDVAEAYGV LNEKEGYSQRGLFIIDPDGILKYATITDDNVGRSV  
EETIRVLQALQNGGLCPGDWKPGQKVLEV

>7421-2155

MALRLGDKVPDFTQESTEGPIQFYDWAGDSWVVLFSHPKDFTPVCTTELGEVAKLKEFAKRNKVIALSVD  
VD SHKWAQDIEETQGAALNFPVLADADRKVS DLYDMIHPSANDTLTVRSVFVIDPNQKLRLTLTYPASTGRNF  
DELLRVIDSLQLTDNYSVATPANWQDGEDCVIVPSLKDEAVLKEKFPKGYTVVVKPYLRMTPQPNK

>7421-0029

MTADTRLFNQRFKFNFLPLPGFSVPAVGEAAPDFVLP RVGGAPVRLSDYRGRMPVVI AFTRIFTEKLFPCFCYPH  
LQDLKNRYGEIRQAGAELLMVTSTDPVQSAQVVADLALPYPFLDPGCTLFQAYGAGQALGAPLPAQYIVDMT  
GTIVYRHLFSFIDSNASTDEV L AVLKALQKV

>7421-3964

MKRKAFVMAALS LALVAANVSTVQADALVGQPAPSFTAADTNGKSHALTD FKGKYVVLEWTNYDCPFVVKQY  
STQAMQEMQKMAAGKGVVWLSVNSSAAGKQGNYP AEKWNTLVKEKGAAPKAILLDGDGKIGQLYGAKTTP  
HMYIINPEGKLIYNGAIDDKPTTDAATKPQNTNYVAAALTEAMAGKPVTVATTRPYGCSVKY

>7421-2108

MARTASTMMELDTLAPAFVLPDVSTGQMLTLASFAGQPALLVMFICRHCPFVKHIQ GELARLGKDYADSGLAIA  
AISANDAVKYPVDSPEL KEMVDELGFTFPVLYDESQQTAIAYQAACTPDDFFLDAARRLVYRGQLDDSRPGNDL  
PVTGKDLRIAIDAVLGGKAPAIEQKPSIGCNIKWKEGNTPPYYG

>843-15330

MSRRQLLSFLIAVILAFFAFIPDANALGGPQPPLNQLAPDFTLPTNTGEGNISLSDYRGKVVVLYFYPKDFTPGCT  
LEARRFQQDLPKYMAKNTQVLGVSADDVSHAFC DSEGLKFP LLADTTGDVSKAYGSWMGYVSLRHTYLIDP

QGILKEIYLGVNPAIHSAEVLARLEELQASS

>843-44920

MTLEVGGQKAPEFATPNQRGEISKLADFAGQWLVLVYFYPKDNTPGCSAEIDFTALSPQFQQLNAVILGVSPDSE  
KSHCRFIEKHNLTIQLLSDPEHQLAEIYQVWGLKFKFMGKEYMGIRRSTFLIDPRGNIAYIWSNVKKAHAEAVLK  
KLEELQ

>843-60930

MALTVGTIAPNFTTTDDTGKTVSLSDFFQKVVVLYFYPKDDTPGCTKQAQSFDRDNYEQYQDKEIVVFGVSRDD  
QGSQAQFKEKYGLPFQQLLVDTDGAIKAYDVGDDGGYKRVTYIIDGEGKISHVDDKVNTASHASDILCVVG

>843-35830

MTAEGCLRVGQPAPDFTATAVFDQEFKTIKLSDYRGKYVVLFFYPLDFTFVCPTTEITAFSDRVSEFSSINTEILGVSV  
DSEFAHLAWIQTERKSGGVGDVAYPLVSDLKKEISTAYNVLDPDAGVSLRGLFIIDKEGVIQHATINNLFSGRSVD  
ETLRTLKAIQYVQSHPDEVCPAGWQEGDATMVPDPVKSKVYFAAV

>843-36510

MALQLGDIVPDFTQDSSEGPISFHQWVGDSWVVLFSHPADYTPVCTTELGTVASLKSEFERRNVKVIASVDSA  
ESHRGWINDINETQNTTVNYPIIADGDRKVSDLYGMIHPNSLNNLTVRSVFIIDPNKKLRLTITYPASTGRNFNEIL  
RVIDSLQLTDNYQVATPANWTDGGDCVVVPSIPEEARSKFKPGVEEIKPYLRMTPQPNK

>843-62780

MLPNREGQRPDVTFPVRQNNQWVNITSEELFKGKTVVLFFALPGAFTPTCSTSHLPGYNELAPVFRENGVDSI  
VCLSVNDTFVMNEWAKDQECDNVVLPDGNGEFSAGMGMLVDKADLFGGQRSWRYSMLVKDGVIEKMFIE  
PEEPGDPFKVSDAETMLNYIGRDATSRSLRAMSGNTTTPQVFINGQLIGGSEELAAYLGA

>843-59730

MARTESTMLDLGTKAPSFALPDVVSGETISLDSFAAKTALLVIFLCEHCPVFKHIQEELTRLGRDYANTNLGILAISS  
NDVEKYPDDSPENLKKMAITLDFKFNLCYDESQEVAKAYTAACTPDFFLFDSQRILVYRGQLDDSRPSNGIPVTG  
KDLRAAIDKVLGTQPVPTDQKPSLGCNIKWKLGNEPPYYG

>29133-F2425

MISRRFLNILFASCISVISWLNFIPAADALGGKLPAINQPAPEFTLPTNTGDGKISLSDLRGKWLVLVYFYPKDFTS  
CTIEARRFQQLPQYLAKNTQIIGVSADDIDSHAKFCDSEGLKFPLLADTDGSVSKAYGSWGLFLSMRHSFIIDP  
QGVLRETFVKVNPTVHSSEVLARLEKLSTAS

>29133-R6477

MTNIPQIQQPAPDFSTPDQNGNSVTLDDFSSQWVILYFYPKDDTPGCTTEAKDFTELYQDFSALGAKILGVSPDL  
GKSHCKFISKHNSITLLSDPEHILTEAYGAWRLKFKFMGKEYMGVARSTFLISPDKIIAYTPNVKAKGHAQAVLT  
KLQELAAT

>29133-F2872

MPIKVGDTAPNFTLPAQNGSTVSLQDFRGTKAVVLYFYPKDDTPGCTAESCAFRDQYEVFKSVGAEVVGVSADS  
SESHQKFAAKYNLPFTLLTDKGDQVRKLYGATAAFGLFPGRVTVYIDQQGVVQYVFDMSMLNFKGHVEEALKTLQ  
QIAK

>29133-R0493

MPLAVGTDAPAFTAKDTNGNTVLSDFAGKTVVLVYFYPKDDTPGCTKQACSFRAQSEYQGGKDIVVLGVSADD  
EVSHQAFTQKYNLNFLLADYDKSLITAFDVGDDGYAKRVTYVIDPNGKITHVDNAVNTTTHASDILAAALGL

>29133-F6082

MSLTYGTEGSLRVGQQAPDFTATAVVDQEFKTIKLSDYRGKYVVLFFYPLDFTFVCPTTEITAFSDRYEEFKINTEV  
LGASVDSEFSLAWIQTRKSGGVGDLNYPVLSDIKKEISAAYNVLDPAAGIALRGLFLIDKDGIIQHATINNLAFG  
RSVDETLRTLQAIQYVQSHPDEVCPAGWQPGDKTMNPDVVKSKVYFSAV

>29133-F6498

MALRLGDTVPNFTQASTHGDIDFYQWAGDSWVVLFSHPADFTPVCTTELGTVAKLKPEFDKRNVKAIALSVDD  
VESHKGWVGDIETQSTTLNYPILADADRKVADLYDMIHPNANAAVTVRSVFVIDPNKKLRLSFTYPPSTGRNF  
DELLRVIDSLQITDNYSVATPADWKDGEDVVIVPSLKDPEVLKEKFKPGYEEIKPYLRMTPQPNK  
>29133-F6083

MLTSTDFSGLLNERFFRNFLPVPARNQLRLGVGTPDFQLPDITNGTLVKLSDYKKGKQPVLLAFTRIFTEKQYCPFC  
FPHIKALNENYEEFKNRGIEVLMITSTDEGQSQIVVKDLGLKMPLLSDPSCRVFRTYQVGGALGAPLPAQFVLDK  
EGKLSYWHLFSFLDRNASIEILLEQFN  
>29133-F6135

MNILETIDTPIGSYAPDFELPGIDGQVHHLRRYLEKFRAVGVISM CNHCPYVEWYIDRLKKIQAKFAPKGFTLIG  
MNGSDGNHETRTSFENMKAFERHNLNFPYLWDSTQDVTQSFGATKTPMAFLIDANGIVRYKKGIDNHPQD  
ASAVGEEYLRTAIASLFLGQPIDVPQTEPVGTTLIWRN  
>29133-F2528

MALTASTMLPLGKAPDFNLPEVVSGKATSLSTFADKKALLVMFICRHCPFVKHIQQELVQLGKDYFTSDLAIVAI  
SANDAKNYPDDAPESLQAFATEQGFNFTLCYDESQETAKAYTAACTPDDFFVDEQRKLVYRGLDDSRPSNGKP  
VTGADLRAAIEAVLAGKPVTSQKPSVGCNIKWKPGNQPSYFG  
>29133-R4657

MVANRRGQRPVNVTFHTRKDNQWVDVTTDQLFANKTVVVFSLPGAYTPTCSSTHLPGYNELAGIFKENGVD  
DIICISVNDAFVMNEWSKDQEAENITLIPDNGEFTEGMGLVDKSDLGFGKRSWRYSMLVRDGVINQMFI  
PDEPGDPFKVSDAETMLRYINPQAVKPEVVSFLFAKVGCPFCARAKAMLKEHGINYEEITLGKDITRSLRAVTGA  
TTVPQVFIDGKLIGGSEALEAYFAAK  
>29133-R6111

MNHNLLYRRQLLFYGLGVVIGAAATFSNFRKVNAPSISPAKSNNTQDLETTVKTPAGKSLPEFQGISQWLNSS  
PLAIADLKGSVILIQFWTFACINCQRTLPIYTKWHQQYESQGLKVIHITPEFAFERDPNNIKKALQQHKITYPVP  
VDNEYKTWNAYENQYWP HIFLADRQGLLQYDHIGEGAYEKIEQTIRQLLG  
>med4-0903

MKSLFGLFVILISLIFNLKSAIAFDYAPEIGDSAPSFHLEGINKSIKSKKIWDSNELIGKWIVLYFYPKDFTAGCTLEAK  
GFSQLKNDFSKYNAEIIIGISADNQSDSHDSFCSEKSINYTLSDPNGTISAKYGSWIPPYSDRNTFLISPEGKITYRWI  
SVLPINHAKEVLNLIKNI  
>med4-0079

MALKVGDKAPEFNLKDSFEKDVSLKDFGKRIILYFYPKDNTPGCTKEACNFKENWDLKQNNFVVLGISKDSA  
ASHQKFIEKFDLPFVLLDPEPYKTSSDYDSYGLKFMGKEYMGMMRNTFLIDVDGKVEKIYLVKAAIMADHII  
SDLGLR  
>med4-0345

MQIGDKVPQFSLDQNGTKRSNGLKTPLVFFYPKDDTPGCTIEVCGFRDKYDLFKVLGAQVWGVSNSSSS  
HLAFANKNLQYPLLCDKNDSLKAFKVPKVLGLLDGRVTVYIDRNGFVKHIFRDLLNGPEHIKEAIRVLKEIQNQ  
>med4-0856

MSLRVQGEAPDFTATAVYDQEFKDITLSSYKGVVVLFFYPLDFTFVCPTEITAFSDEFNKFSDLNTEVLGVSVD  
KHCHLAWIQTPRNEGGIGDINYPLVSDLKREICQAYNVLNDDGEADRGLFLINPEGIVMHTTVNKAPVGRNVD  
ETLRILQGYQYVAANPDEVCPANWTPGEKTMLEDPKGSKEYFSAL  
>med4-0283

MVKTNSMVLELGFQLPNFKMLNANSSNNQYFNHNLNDRHLLMFICAHCPFVKYIENQIFTLKSKEIENTVQT  
VAISSNDIVTHPSDSDPYLRLQAQSQGWSFPYLYDENQNFAKELKAACTPDFYLSNEGDGDFLLFYHGQLDDS  
RPGNNIPLSGKDLRSVAVKDLNQDNSYPSNQIPSLGCNIKWTPGKEPSWFK  
>9312-0897

MRTLVSILISFFLLINCNSTLAFDFAPEVGD SAPNFQLEGFNKNIKSKKIWELSD FQGKWLVIYFYPKDFTAGCTL  
EAKGFSELKKDFSKYNAEIIIGISADKKDSHESFCSEKSITYTLLSDPEGIISDKYGSWIPPYSDRNTFLISPEGTISYRW  
ISVLPINHAKEVLNVLKKKI

>9312-0082

MALKVGDKAPEFKLDSFDKEVSLNDFKGRILIYFYPKDNTPGCTKEACNFKENWDLQKNNIVVLGISKDNA  
VSHQKFIKFNLPFILLTDPEPFKVSSDYDSYGLKKFMGKEYMGMRRNTFLIDTDGKIEKIYLVKAAIMADHIIA  
DLRLQ

>9312-0353

MQIGDKIPEFSLLDQNGIKRSNGLKNPLVFFYPKDDTPGCTIEVCGFRDKYDLFKVLGAQVWGVSNSSSSH  
LAFANKNKLQYPLLCDTNNSLRKTFKVPNVLGFMDGRVTVYIDRNGIVRHIFRDLLNGPEHIKEAIRVLKEIQNK

>9312-0944

MSLRVQGEAPDFTATAVYDQEFKEITLSGLRGKVVVFFYPLDFTFVCPTTEITAFSDRYQDFSSIDAEILGVSVDK  
HCHLAWIQTPRNEGGIGDINYPVSDLKREICQAYNVLNDDGEDRGLFLINPEGIVMHTTVNKAPVGRNVDET  
LILQGYQYVAANPDEVCPANWTPGEKTMLEDPKGSKEYFSAL

>9313-1012

MKRSELLRVTGAAVLSISQCLGRPSQALAMEGKLPALDAQAPDFELEAAAQEGALAEKLQRDAFLGSWLVLYFY  
PRDFTSGCTLEARGFQRDLSDFKAAGAAVVGVSADGTEEHVSFCSSEGLGYTLLSDPGGVVSEYGSWSSPFSQ  
RHTFLIDPDGILRARWKDVSPSRHSQDVLRALKELQQS

>9313-1622

MTLKIGDPAPDFNLPNQDGLVQLASLRGQRVVIYFYPKDDTPGCTKEACNFRDQWERFEANDIKVLGISKDG  
ATSHTKFIKKYQIPFTLLSDAEPVASSYESYGLKKFMGREYMGMMRHSFVVDPKGNLELIYLVKKAATMADQ  
ILKDLGLD

>9313-0387

MALQVGDKAPAILVDQNGNKRNSNDLKGKVLVFFYPKDDTPGCTAEACNFRDNYSVFENLGSEVWGVSGD  
DDISHRQFAERHGLPYALLSDKDNTLRRAFEVPRTLGMLPSRVTYVIDGQGTIRHIFNLLDGP AHMREACRVV  
EEIKKKR

>9313-0754

MTTNECLRVGQQAPDFNATAVVDQEFKEISLSQYRGKYVVLFFYPLDFTFVCPTTEITAFSDRYTDFSSRNTEVLG  
VSVDSQFSLAWIQTSRKEGGLGDINYP LIADLKEISTAYNVLDDEAGVALRGLFIIDPDGVIMHSTINNLVGR  
NVDET LRVLQAFQYVQSHPDEVCPANWTPGEKTMKDPVGSKEFFASIN

>9313-1186

MPFPQNVDPVTFKTRVRDESVPGSNPFWRQDLTSAEIFKGRKVVV LALPGAFTPTCSSNHLPRYEELHAELVAQ  
GVDQIVCLSVNDAFVMFQWSKHLGTKNIFMLPDGNGEFTRKMGMLVEKSNLGFGLRSWRYSMLVND CNIEK  
MFVEPGFSDNADGDPFEVSDADTMLAYMKGVSAGVSSPCREFQG

>120-0932

MVINYIKNIIFILIFAITITSYPSIVFSNSV PNINEQAPGFELEGYNPERPKTKWSSNDFKGSWLILYFYPEDATSGC  
TIEAKGFQRLNKEFLSHKANIVGISKDSKASHKLFCSQKLDFTLLSDKDSQISKSFGSWQEGFSSRNTFLIDPNGI  
IKYRWLAVIPIKHAKEVLSVLNRIDQT

>120-0093

MSLQIGEKAPDFTLPDQDGKLIKLSFKGERVVIYFYPKDDTPGCTKEACNFRDRWDILQNHKINVIGISKDPAN  
KHSKFINKYQLPFILLTDLEPCVATSYESYGLKKFMGKEYMGMKQTFVIDSEGKLEVIYLVKKAAS MADQIVQDL  
ALE

>120-0978

MTEGCLRVGQMAPNFTA EAVVDQEFKQISLTDYRGKVVVFFYPLDFTFVCPTTEITAFSDRFSDFSKSTEILGVS

VDSKHCHLAWIQTPRNRGGIGDITYPLVSDLKREIATAYNVLNDDGEADRGLFLINPEGIIMHCTINKAPVGRNV  
DETLRILQGYQYVASNPDKVCPANWNPDKTMELEDPKGSKEYFASL

>9601-09581

MRNLVISIFISIFILFNCTSVIAFDFAPEVGDIAPNFQLEGFNKNIKSKNIWELNDFQGWLVMYFYPKDFTAGCT  
LEAKGFSELKKDFSKYNAEIVGISADNQDSHESFCSEKSINYTLSDPDGIISKKYGSWIPPFSDRNTFLISPKGEISY  
RWISVLPINHAKEVLNVLKKKI

>9601-00921

MALKVGDKAPEFKLKDSFEKEVLSDFKGRILIYFYPKDNTPGCTKEACNFKENWDLQKNNIVVLGISKDNAS  
SHQRFIEKFNLPFILLTDPEPFKVSSDYDGLKFKMGKEYMGMMRNTFLIDTEGNIKIEIYLVKAAIMADHIIAD  
LGLS

>9601-03811

MQIGDKIPEFSLLDQNGVKRSNKGLKNPLVFFYPKDDTPGCTIEVCGFRDKYDLFKVLGAEVWGVSNGSTSSH  
LAFANKNKLQYPLLCDTNDALRQTFKVPKVLGFMGDRVTVYIDRKGTVRHIFRDLLNGPEHIKEAIRVLKEIQNQ

>9601-10131

MSLRVQGEAPDFSATAVYDQEFKEVTLGSLRGKVVVFFYPLDFTFVCPTAITAFSDRYQDFSALNTEILGVSVD  
KHCHLAWIQTPRNEGGIGDINYPLVSDLKREICQAYNVLNDDGEADRGLFLINPEGVVMHTTVNKAPVGRNV  
DETLRILQGYQYVAANPDEVCPANWTPGEKTMLEDPKGSKEYFSAL

>9211-08571

MLNLIRILSKNLATILVVFLIASPTYAINSNNINIGDKAPYFELDGYSKNNPKDLWKLSDFKGVWTVLYFYPKDFT  
SGCTIARSFEKLSPEFEKLNAMIVGISNDIQESHESFCSEKLSFTLLDQGVSEKYSSWNPKPYSKRNTFLIDPE  
GVIRYSWMNVNPLKHPTDVLKKTTELQV

>9211-15101

MSLNIGDKLPDFSLFDQEGKIRTSKQCKGKLVFFYPKDDTPGCTAEACGFRDKYDLFKLFGAVVWGVSNNDQ  
LSHQKFAEKNKLPFLLCDENNSLRTLFGVPKVLGLLDGRVTVLVDSTGVIRHIFNDLLNSTKHVTTALEILEEIK

>9211-00881

MIAMPLQVGDTAPEFTLPDPNGTLVSLSSFRGQRVVIYFYPKDNTPGCTKEACNFRDLWKDFKSNNIKVIGISKD  
SGTSHLKFISKYQLPFTLLSDSEPCPVASSYESYGLKFKMGKEYLGMMRKTFFVIDSEGKIELIYHKVKAEMAKQIL  
DDLSLT

>9211-09041

MMTNECIRVGQKAPDFTATAVIDQEFKEISLSNYRGKYVVVFFYPLDFTFVCPTAITAFSDRYSEFSSKNTEVLGVS  
VDSQFSLHAWIQTRNDGGIGDINYPLVADLKEISLAYNVLDDAEGVALRGLYIIDPDGVMHATINNLVPVGRN  
VDETLRVLQAFQYVQANPDEVCPANWTPGEKTMKPDPEGSKEYFSSL

>9215-09891

MRNLVLGIIPIILLFNYSALSDFFAPEVGDQAPNFHLEGFNKNIKSKSIWELSDFQGWLVMYFYPKDFTAGCT  
LEAKGFSELKKDFKYNNAEIVGISADNQDSHESFCSEKSINYTLSDPEGVISDKYGSWIPPFSDRNTFLISPEGNIS  
YRWISVLPINHAKEVLNVLKKKI

>9215-00921

MALKVGDKAPEFKLKDSFEKEVLSDFKGRILIYFYPKDNTPGCTKEACNFKENWDLQKNNIVVLGISKDNAS  
SHQKFIEKFNLPFILLTDPEPFQVSSDYDGLKFKMGKEYMGMMRNTFLIDTEGKIEIYLVKAAIMADHIIAD  
LGLS

>9215-03801

MQIGDKIPEFSLLDQNGVKRSNKGLKNPLVFFYPKDDTPGCTIEVCGFRDKYDLFKVLGAQVWGVSNGSTSSH  
LAFANKNKLQYPLLCDTNDLSLRTFKVPKVLGFMGDRVTVYIDRKGTVRHIFRDLLNGPEHIKEAIRVLKEIQNQ

>9215-10441

MSLRVQGEAPDFSATAVYDQEFKEITLSGLRGKVVVFFYPLDFTFVCPTEITAFSDRYNDFSALNTEILGVSVD  
KHCHLAWIQTPRNEGGIGDINYPLVSDLKREICQAYNVLNDDGEADRGLFLINPQGVMMHMTVKNKAPVGRNV  
DETLRILQGYQYVAANPDEVCPANWTPGEKTMLEDPKGSKEYFSAL

>9215-03081

MVRTNSMILELGFQLPNFEMLNANSSNNEYFNHNLNDRHLLMFICAHCPFVKYIEKQICTLSKEIENIVQTVA  
ISSNDIVTHPSDSPENLRLQAESQGWNFPLYDENQNFAKELKAACTPDFYLFSNKGDNFLLYYHGQLDDSRP  
GNNIPLSGEDLRS AVRDLNQDNTYPANQMPSLGCNIKWTPGKEPSWFK

>9301-09561

MRSLVVSILIPFIILFNCYSALSDFFAPEVGDYAPNFKLEGFNKNIKTKKTWELSDFEGQWLVMYFYPKDFTAGCT  
LEAKGFSELKDFSKYNAEIVGISADNEDSHESFCSESNYNTLLSDPDGIIISDKYGSWIPPFSDRNTFLISPDGKISY  
RWISVLPLNHAKEVLNVLKKKI

>9301-00911

MALQVGDKAPEFKLDSFEKEVSLDFKGGKIIIFYPKDNTPGCTKEACNFKENWDLQKNNIVVLGISKDNAS  
SHQKFIEKFNLPFILLDPEPFKVSDDYDGLKFKMGKEYMGMMRNTFLIDTDGNIKIEIYLVKAAIMADHIIAD  
LGLS

>9301-03801

MQIGDKIPEFSLLDQNGVKRSNRGLKNPLVFFYPKDDTPGCTIEVCGFRDKYDLFKVLGAQVWGVSNGSTSSH  
LAFANKNKLQYPLLCDTNDSLRKTFKVPKVLGFMGDRVTYVIDRKGTVRHIFRDLLNGPEHIKEAIRVLKEIQNQ

>9301-10121

MSLRVQGEAPDFSATAVYDQEFKEITLSGLRGKVVVFFYPLDFTFVCPTEITAFSDRYQDFSALNTEILGVSVD  
KHCHLAWIQTPRNEGGIGDINYPLVSDLKREICQAYNVLNDDGEADRGLFLINPEGIVMHTTVKNKAPVGRNV  
ETLRILQGYQYVAANPDEVCPANWTPGEKTMLEDPKGSKEYFSAL

>9303-10801

MLSISQCLGRPSQALAMEGKLPALDAQAPDFELEAAAQEGALAEKLQRDAFLGSWLVLVYFYPDRDFTSGCTLEAR  
GFQRDLSDFKAAGA AVGVVSADGTEEHVSFCSSEGLGYTLLSDPGGVSEYGSWSSPFSQRHTFLIDPKGILRM  
RWLAVSPSRHSQDVLRELKELQQS

>P9303-02611

MTLQIGDPAPDFNLPNQDGLVQLASLRGQRVVIIFYPKDDTPGCTKEACNFRDQWERFEANDIKVLGISKDG  
ATSHTKFINKYQIPFTLLSDTEPCPVASSYESYGLKFKMGREYMGMMRHSFVDPKGNLELIYLVKKAATMADQ  
ILKDLGLD

>9303-19011

MALQVGDKAPAILVDQNGKRRSNDLKGKVLVFFYPKDDTPGCTAEACFRDNYSVFEKLGSEVWGVSGD  
DDISHRQFAERHSLPYALLSKDNTLRRAFEVPRTLGMLPSRVTYVIDGQGTIRHIFNNLLDGP AHMREACRVV  
EEIKKKR

>9303-14621

MTTNECLRVGQQAPDFSATAVVDQEFKEISLSQYRGKYVVVFFYPLDFTFVCPTEITAFSDRYTDFSSRNTEVLGV  
SVDSQFSLAWIQTSRKEGGLGDINYPLIADLKEISTAYNVLDDAAGVALRGLFIIDPDGVIMHSTINNLPVGRN  
VDETLRVLQAFQYVQSHPDEVCPANWTPGEKTMKPDVGSKEFFASIN

>9303-08311

MPSLQSVDPVTFKTRVRDESVPGNPFRWQDLTSAEIFKGRKVVVLLALPGAFTPTCSSNHLPRYEELHTELVAQ  
GVDQIICLSVND AFVMFQWRKHLGTKNIFMLPDGNGEFTRKMGMLVEKSNLGFGLRSWRYSMLVND CNIEK  
MFVEPGFSDNADVDPFEVSDADTMLAYMKGVPAGVSSPRRKFEFEG

>9303-25151

MQSHPEPALMGCFPNMALTPTMLPLGTPLPSFELKVVPGTNLEIDDGLGALNTINTSTLPTKPLLLMALCAHC

PFVKHIEKELTHLDQDYGDSVQLLAIASNSLITHPQDGPEQLAAQAKQQGWRFYLLDTDQSLAKALQAACTP  
DFFLFAPSPQGLQRLCYRGQLDNSRPGNHAPVTGSDLRAALDAVLNGQDVSPNQASIGCNIKWHPGQEP  
WFG

>9515-09851

MKSLFSIFIIIIFFNFKSVIAFDYAPEVGDIAPSFHLEGINKNIKSKKIWDSNELKGKVVLYFYPKDFSAGCTLEA  
KGFSKLLKDFSKYNAEIIIGISADKEETHESFCSEQSINYTLSDPNTGISEKYGSWIPPYSDRNTFLISPKGEIVFRWI  
SVLPINHAKEVLNVLKKN

>9515-00891

MALRVGDVAPEFKLDSFEKDVSLKDFKGRILYFYPKDNTPGCTKEACNFKENWDLKQNNFVIGISKDSSA  
SHLKFIKFDLPFVLLDPEPFKVVSSDYSLKFKFMGKEYMGMMRNTFLIDADGKVEKIYLVKAAIMADHIIS  
DLGLR

>9515-03821

MKIGDKVPLFSLDQNGTRRTNEGLKSPLVFFYPKDDTPGCTIEVCGFRDKYDLFKVLGAQVWGVSNGTSSSH  
LAFANKNKLQYPLLCDIDDSLRTKFKVPKVLGLLDGRVTVYIDRNGFVKHIFRDLLNGPEHIKEAIRVLKEIQNQ

>9515-09331

MSLRVGQEAPNFTATAVYDQEFKEITLSSYKWKVVVFFYPLDFTFVCPTEITAFSDEYEKFSALNTEILGVSVDK  
HCHLAWIQTPRNEGGIGDINYPLVSDLKREICQEYNVLNDDGEADRGLFLINPQGIVMHTTVNKAPVGRNVDE  
TLRILQGYQYVAANPDEVCPANWTPGEKTMLEDPKGSKEYFSAL

>1A-09761

MKRSEFIKSFILFSSILFIKPSRLYASINSVKIGKKAPNLLNGYNKNSPNKKQWSLDDFSKKWLVLVYFYPKDFSSGC  
TLEAKNFQDNLNKNINASIVGISADSEEEHESFCTSENLYTLLSDANSEISKSYDSWLDPYSKRNTFLINPEGI  
VVYKWIGVRPIGHAQEVKELTKQKQIYA

>1A-15651

MKLKIGDQIPSFSLKDQGNIRTSNNLKKSLVFFYPKDDTPGCTIEVCGFRDKYDLFKILGAEVWGISNGSSQSH  
LGFANKNKLQYPLLCDQNNILRNQFGVPKLGFIIEGRVTVIINSEGVIKHIFEDLLNGPAHIKEAIKALKKLQ

>1A-16391

MPLKLGDQIPDFSLSDQLGVSRTNKQAKGRPLVFFYPKDDTPGCTAENCGFRDKYDLFKLGAEVWGVSGDD  
EASHRSFADKNKLPFLLCDTENSRRAFGVPKVLGLLDGRVTVIIDSKGIVIRHIFNDLLNGPAHVNEALRVLGEIR  
N

>1A-01441

MTLCIGDSAPDFLTPNQDGVDISLSSFQGSRVVIYFYPKDDTPGCTKEACFRDNWELFKSNNIQVLGISKDASK  
SHIKFIDKHKLPFTLLTSDPCPVAASYESYGLKFKMGREYYGMMRHTFVVKYKIELIYLVKSDNMANQILN  
DLKLN

>1A-10331

MTTNECLRVGMQAPDFATTAVVDQEFKDITLSQYRGKYVVLFFYPLDFTFVCPTEITAFSDRYSDFSKNTEVLG  
VSVDSKFTHLAWIQTPRNEGGIGDINYPLVSDLKREICQSYNVLNEDGEADRGLFIINPSGIIMHSTINKAPVGRN  
IDETLRVLQAYQYVESHPDEVCPAGWTPGDKTMKEDPKGSKEYFSAL

>1A-03631

MVRTASTMLPLGTQLPDFELGVVSGVNSAPDDPLKGLSHIRSVDLTKRPLFLMVICAHCPVKHVESGITNLFNS  
FGNDIQFLAISSNSLITHPQDAPEFLASQANKLGWKFYPLFSDQKLAKALRAACTPDFYVFWPSPDGNLTRY  
RGQMDGSRPGNEIPVSGDDIRLVFKSLLKGEVISANQKPSIGCNIKWHPGMEPEWFG

>2A-0304

MKRSEFIKSFILFSSILFIKPSRLFASINSVKIGKKAPNLLNGYNKNSPNKKQWSLDDFSKKWLVLVYFYPKDFSSGC  
TLEAKNFQDNLNKNINASIVGISADSEEEHESFCTSENLYTLLSDANSVISKSYDSWLDPYSKRNTFLINPEGIV

VYKWIGVRPIGHAQEVLKELTKQQKIYA

>2A-0727

MKLVKVDQIPFSFLKQKGNIRTSNNLKKSLVFFYPKDDTPGCTIEACGFRDKYDLFKILGAEVWGISNGSTQS  
HLGFANKNKLQYPLLCDQNNILRNQFGVPPKLGFIAGRVTYIINSEGVKHFEDLLNGPAHIKEAIKALKKQ

>2A-0787

MPLKLGDIQIPDFSLSDQLGVSRTNKQAKGRPLVFFYPKDDTPGCTAENCGFRDKYDLFK  
LFGAEVWGVSGDDEASHRSFADKNKLPFLLCDTENSRRAFVGPVKVGLLDGRVTYIID

SKGVIRHIFNDLLNGPAHVNEALRVLGEIRN

>2A-1443

MTLCIGDSAPDFTLPNQDGVNISLSSFQGSRVVIYFYPKDDTPGCTKEACSFDRDNWELFKSNNIQVLGISKDASK  
SHIKFIDKHKLPFTLLTSDPCPVAASYESYGLKFKMGREYGMRRHTFVFNKDGKIELIYLVKSDNMANQILN  
DLKLN

>2A-0352

MTTNECLRVGMQAPDFATTAVVDQEFKDITLSQYRGKYVVLFFYPLDFTFVCPTEITAFSDRYSDFSSKNTEVLG  
VSVDSKFTHLAWIQTPRNEGGIGDINYPLVSDLKREICQSYNVLNEDGEADRGLFIINPSGIIMHSTINKAPVGRN  
IDETLRVLQAYQYVESHPPDEVCPAGWTPGDKTMKEDPKGSKEYFSAL

>2A-1649

MVRTASTMLPLGTQLPNFELGVVSGVNSAPDDPLKGLSHIRSVDLTKRPLFLMVICAHCPFVKHVESGITNLFNS  
FGNDIQFLAISSNSLITHPQDAPEFLASQANKLGWKFPYLFSDQKLAKALRAACTPDFYVFWPSPDGNLTLRY  
RGQMDGSRPGNETPVSDDIRLVFKSLLKGEVISANQKPSIGCNIKWHPGMEPEWFG

>6301-0883\_d

MPVSRRLQLLSLLALPALVLAAPSAQALGGPQPPVDEPAPDFSLPTDDGRERLSLADFRGQWLVLVYFYPKDGTP  
GCTLEAQRQQDLAAYAERNAQIVGVSAADDLSSHSRFRENEGLSYLLADVKGEVSKRYGSWLAPFSLRHTYIID  
PEGVLRANFTAVRPVIHSKEVLAKLDELQAG

>6301-2152\_c

MAIAVGDVAPDFSLPAQDGTTVLSDFRGQKPVVLYFYPKDDTPGCTIEACSFDRDSYAFQEVGAVVLGVSSDSI  
DSHQRFQAKYNLPFQLLSDAGDRLRQTYGVPKTLFVIPGRVTYVIDKEGKVRHIFDSSLNAQAHIQESLNILRSL

>6301-2287\_c

MPLQVGDRAFDFTLPDQGNPVSLDLRGQRVVIYFYPKDDTPGCTKEACGFRDDFSLFEQAGIVVLGVSKDP  
ASKHQKFIKYLFPFTLLTADAAVASAYSGLKFKMGREYMGMMRHTYVIDVEGKIEQYTKVKPETHARQIL  
TDLGVAVAE

>6301-1915\_d

MALTVGTAAPDFTALDDAGQSIQLSQFRGKTIVLYFYPKDDTPGCTKEACSFDRDSYSAYQKDIIVLGVSTDDSSS  
HEQFKTKFSLPFLVADPDRSITQAYDVGDDGYAKRVTYVIDGEGQIIRVYDSVKTDTHAGDILADLGL

>6301-1793\_d

MRLMTEGALRVGQLAPDFEATAVVDQEFQTIKLSNYRGKYVVLFFYPLDFTFVCPTEITAFSDRYADFSALNTEIL  
GVSVDSQFSLAWIQTSRKEGGLDYLAVLADLKEISTAYNVLDPAEGIALRGLFIIDKEGVIQHATINNLAFGR  
SVDETLRVLQAIQYVQSHPPDEVCPANWQPGAATMNPDPVKSKEFFAAV

>6301-1657\_c

MSLRLGDTVNFQTSSEGEINSYDWAGDSWVILFSPADYTPVCTTELGTVAKLEEEFAKRNVKPIALSVDV  
ESHKGWIGDINETQGTQVNYPIADPDRKVSPLYDMIHNPANNTLTVRSVFIDPNKKLRLTLTPASAGRNFE  
LLRVIDSLQLTDNYSVATPANWWDGDDVVVPSIPTEQAREQFPKGVTEVKPYLRLTPQPNR

>6301-2361\_c

MAKTASTMLALGTAAPDFALPDVVSGRVQLADFSDRAGLLVMFICQHCPFVKHVEEELAAIGRDYLDLGVIAIS



PNSLETHPQDGPEQLKAQAERLGFTFPYCLDETQAIKAYTAACTPDDFFLDRDRRLVYRGQLDDSRPSSDRPVT  
GADLRAAITAVLTGDAPSADQKPSIGCNIKWHPGQEPDYYGAQLV

>7942-0642

MPVSRRLQLLSLLPALVLAAPSAQALGGPQPPVDEPAPDFSLPTDDGRERLSLADFRGQWLVLVYFYPKDGTP  
GCTLEAQRQQDLAAYAERNAQIVGVSADDLSSHRSFRENEGLSYPLLADVKEVSKRYGSLAPFSLRHTYIID  
PEGVLRANFTAVRPVIHSKEVLAKLDELQAG

>7942-1942

MAIAVGDVAPDFSLPAQDGTTVSLSDFRGQKPVVLYFYPKDDTPGCTIEACSFSDSYTAFQEVGAVVLGVSSDSI  
DSHQRFAQKYNLPFQLLSDAGDRLRQTYGVPKTLFVIPGRVTVYVIDKEGKVRHIFDSSLNAQAHIQESLNILRSL

>7942-1806

MPLQVGDRAFDFTLPDQGNPVSITDLRGQRVVIYFYPKDDTPGCTKEACGFRDDFSLFEQAGIVVLGVSKDP  
ASKHQKFIKAYELPFTLLDADAASAYDSYGLKKFMGREYMGMMRHTYVIDVEGKIEQIYTKVKPETHARQIL  
TDLGVAVAE

>7942-2180

MALTVGTAAPDFTALDDAGQSIQLSQRGKTIVLYFYPKDDTPGCTKEACSFSDSYSAYQKDIIVLGVSTDDSSS  
HEQFKTKFSLPFLVADPDRSITQAYDVGDDGGYAKRVTVYVIDGEGQIIRVYDSVKTDTHAGDILADLGL

>7942-2309

MTEGALRVGQLAPDFEATAVVDQEFQTIKLSNYRGKYVVLFFYPLDFTFVCPTEITAFSDRYADFSALNTEILGVS  
VDSQFSLHAWIQTSRKEGGLDLAYPLVADLKEISTAYNVLDPAEGIALRGLFIIDKEGVIQHATINNLAFGRSVD  
ETLRVLQAIQYVQSHPDEVCPANWQPGAATMNPDPVKSKEFFAAV

>7942-2449

MSLRLGDTVNFQQSSEGEINFYDWAGDSWVILFSPADYTPVCTTELGTVAKLKEEFAKRNVKPIALSVDV  
ESHKGWIGDINETQGTQVNYPIADPDRKVSPLYDMMIHPNANNTLTVRSVFIIDPNKKLRLTLTPASAGRNFDE  
LLRVIDSLQLTDNYSVATPANWWDGDDVVVPSIPTEQAREQFPKGVTEVKPYLRTPQPNR

>7942-1730

MMAKTASTMLALGTAAPDFALPDVVSGRVTVQLADFSDRAGLLVMFICQHCPVFKHVEEELAAIGRDYLDLQIV  
AISPNSLETHPQDGPEQLKAQAERLGFTFPYCLDETQAIKAYTAACTPDDFFLDRDRRLVYRGQLDDSRPSSDR  
PVTGADLRAAITAVLTGDAPSADQKPSIGCNIKWHPGQEPDYYGAQLV

>9311-1400

MNRRSLLQTAVLGAGIFLLAPTRVHALGGQSPEIGIKAPDFDLPGFSSVNPDKHWSLTGLQGRWLVVYFYP  
FTSGCTIEAHGFQDLSAFNKSGAEVVAISADSVSDHESFCSSEELKFPLSDPDGLVSKAYGSMAPYSMRHTF  
LIDPESVVQAVWTGVRPVGHAKEVLNRLNLDLQTS

>9311-2508

MTLQIGDLAPDFTLPDQNGEPVHLASLRGKRVVIYFYPKDATPGCTKEACNFRDRWSSFKDHGIHVLGISKDNA  
SSHTRFIKQELPFTLLSDEPCPVASSFESYGLKKFMGRESMGMMRHTFVVDVAEGRLELIYRKVKSDSMADQI  
LSDLGIS

>9311-1556

MALTIGDRAPEIALEDQDGVLRRLRDELQDKVLVLFYFYPKDDTPGCTAEACAFRDYATFEALGAVVWGVSSDDA  
VSHRKAQRYQLPFPLSDQQLRRTSFGVPKVLGLLPGRVTVYVIDAEGTIRHLFNNMLDGPAAHVREAERIVTEL  
SKG

>9311-1322

MGQQAPDFTATAVVDQEFQEISLSQYRGKYVVLFFYPLDFTFVCPTEITAFSDRYSDFSKNTEVLGISVDSQFSH  
LAWIQTARNQGGIGDINYPVSLDLKEISTAYNVLDAAEGVALRGLFIIDPEGVIMHATINNLVGRNVDETLRVL  
QAFQYVQSNPDEVCPANWTPGEKTMKPDPKGSKEFFAAIG

>9311-0254

MLDAMVLTPTMLPLQHPLPQFSLPLVSGHPPWSSLELVTSRDLPGRPLLMLICAHCPFVKHVEPEITRVESD  
FAGQITLLAISSNSLTHHPQDGRDGLRQQADQQGWRFPYLLDEQQTLAKDLRGACTPEFYAFAPDADGTQTLR  
YRQQLDSSRPGNNQPLDGADLRAALTNILAGT  
AVSETQLPSVGCNIKWNPGQEPPWFGQST

>9311-0689

MIQMKSFQVQPDVVFHTRVRDESVMGNTNPFVWVKDRSSAEIFHNKKVVLFSPLGAFTPTCS  
SNHLPRYEELYDEFRSQVVDQVICSVNDAFVMFQWKGHIGVKNIFLLPDGNGEFTRKMG  
MLVSKDNLGFGMRSWRYSMLVDNGTIEKIFIEPGFADCCPDDPFEVSDADTMIAYLKGSTSSGIKPNDFVG

>9605-1406

MNRRELLVKSGLFLAALTTPSRASALGGVVLETGTTVPDFDLPGSSQSEPDRKQWSSRDLRGRWLAAYFYPRD  
FTGGCTIEARGFESLHNDFLQAGAEVIGISADSVDDHESFCESEGLSFLLSDPDGTVSKAYGSWMAPYSLRHTF  
LIDPDGVLRRWVAVRPNGHAREVLDLSTVFQSEAAV

>9605-1141

MALGIGDRLPSFSLDQNGDLRTPASVQGRWLVLFFYPKDDTPGCTAEACSRDNAESFAALDAEVWGISGDD  
AVSHRRFATRHNLTFFLLCDRNNALRREMGPVKALGLLPGRVTYIVDGEVIRHTFSNLLDGPAAHVREAQQVLN  
QLRG

>9605-2307

MSLQIGDAAPDFTLPDQNGDSISLASLRGKKVLLYFYPKDDTPGCTKEACNFRDRWEQLKANNITVLGISKDGA  
TSHNKFINKHELPFTLLTDEEPCAVASLYESYGLKKFMGREYMGMMRHTFLIDEEGKLERIYLVKAATMADTLIS  
DLGLS

>9605-1324

MTDTGCLRVGQLAPDFTATAVVDQEFKEVTLISQYRGKYVVLFFYPLDFTFVCPTEITAFSDRYADFSSKNTEVLGV  
SVDSQFSLAWIQTTPRNQGGLDINYPVLADLKEISTAYNVLDDAEGVALRGLFIIDPDGVIMHATINNLVGR  
NVDETLRVLQAFQYVQSNPDEVCPANWTPGEKTMKDPKGSKEYFSAIG

>9605-0215

MALTPSTMLALGTRLPDFDLQVTDGRLNSQSLVERPVLMLVLCACHCPFVKHVEPELSRLDHFSEAVQLVGVS  
SNSLITHPQDGPQLADQAKRQGSFPYLLDEQQTLARDLRAACTPEFYLFSPDGEGQLSLRYRGQLDGSRPS  
NDLPLDGRELRAALDAVLTGSPVNPQDTASVGCNVKWNPGHEPEWFG

>9902-1080

MHRRELLIQTGLLLTAWSLKPSRASALGGVVLETGNTAPAFSLPGSSRSQPDQSNWSLQDFKGRWVAVFYPR  
DFTGGCTIEARGFETLHSDYLAANAEEVVISADSVDDHESFCESEGLSFLLSDPDGTVSKAYGSWMAPYSLRHT  
FLIDPDGVLQQRWVAVRPSGHAQEVLDFLTNLQNKTSV

>9902-1316

MGLGIGDRLPNFSVEDQNGDQRSSQVQGRWLVLFFYPKDDTPGCTAEACSRDNSSNFAALNAEVWGVSG  
DDAVSHRRFAERHLSFLLCDRNNALRRQMGVVKALGMLPGRVTYVVDTTGVIRHTFSNLLDGPAAHVREAER  
VLKELQS

>9902-0386

MALQVGDPAAPDFTLPNQDGESVQLSSLKGRVILYFYPKDDTPGCTKEACNFRDRWGRFEEHNIKVFISKDN  
AASHTKFISKHSLPFTLLTDEEPCAVASLYNSYGLKKFMGREYMGMMRHTVVIDAEGRIERYLVKAATMADTL  
LSDLGLD

>9902-1150

MTIMTDNGCLRVGQKAPDFTATAVVDQEFKEISLSQYKGYVVLFFYPLDFTFVCPTEITAFSDRYSDFSSKNTEV  
LGVSVDSQFSLHSWIQTARNQGGLDINYPVLDLKEIATAYNVLDDAEGVALRGLFIIDPDGVIMHSTINNLV

GRNVDETLRVLQAFQYVQANPDEVCPANWTPGKTMKPDPEGSKEYFSAIS

>9902-0242

MPSGAILMETVWICSAAMARTASTMLALGTPLPAFRLARVNGDKVNGVQVKADTFASTDFEQKPILLMVLCA  
HCPFVKHIEPEITRENDFASQVQFVGLSSNSLITHPQDGAQLAEQAQRHGWAFPYLLDDQQVLAKSLQAAC  
TPEFYLSQDSKSSPTLQYRQQLDSSRPGNNQPLNGSDLRAALNAVLTGTSVSQKQVASVGCNVKWNPGQE  
PEWFG

>JA23-2186

MGLVVGLLVGFGMTQPAWAQWGTTPLPPIGSPAPEFALPDQSGQIRRLADFRGEWVVLYFYPRDFTSGCTIEA  
RRFQQDLPKFRAMGAQVVGVSADSVDSHRRFCSAEGQLQFLLSDPDGTVSRAYGSWMGDVALRNTFLIDPEG  
ILREIDPIVNSRHSAEVLAQLQLLRN

>JA23-0523

MPLAVGDPAPEFTLPDAEGNPISLSQLRGQRVVLYFYPRDNTPGCTQEACGFRDAYADYQAHGAILGVSADDA  
RSHQKFAQKLQLPFLLVDEGAKVARAYGVYGPCKFMGKEYNGIHRTTFVIDPEGKIEAVITKVKVETHAAELLK  
QLTGS

>JA23-1057

MVLAVGTPAPGFNTTDTQGNQVSLADFAGKTVVLYFYPKDDTPGCTKEACGFRDAYADYQSKDVVVLGVSM  
DQASHQKFTKEYNLFPFLLVDSSGVITRAYDVGDDGYAKRVTYVIDGEGKIAKVYQININTETHARDILADLGL

>JA23-1376

MGIVIGAVAPDFSLPAVGKGIQKGAQISLAAYRGKSKVLLAFYPADFSVCTSEMRCFREDWEAFRAAGCEILGIS  
SDPLSRHQAFAEQLKLEFLLSDVDRTVSQQYGVDSLLGTRRAYFLVDSQGILRYQHVEWLPFKRDNRELLEAV  
RAIS

>JA23-2254

MSQEGCLRVGQPAPDFSATAVYDMEFKTVKLSYRGKKYVVLFFYPLDFTFVCPTETAFSDRYDDFAKLDTEILG  
VSVDSEYSHLAWIQTRKAGGVGELRYPLVSDLKKEISAAYNVLDPEAGVALRGLFIIDKEGIIQHATINNLA  
FGRS  
VDETLRTLQAIQYVQSHPDEVCPANWQPGQKTMHPDPVKSKEFFAAIAK

>JA23-0113

MSLRLGDTAPNFTQKSTHGEIDFYSWAGDSWVVLFSHPADYTPVCTTELGTVAKLMPEFEKRGVKVIALSVDD  
VDSHVGVWKDIEETQATLTYPIADADRKVSQLYGMLDQTNLNQEGPLTVRSVVIDPNKKIRLILTYPASTGR  
NFDELLRVIDALQLTDKYNVVTAPDWKGDGDDVIPPVSLKDPEVLKEKFKYKEIKPYLRVAPQPNK

>JA23-0140

MTSNSGLFNRRFADNFIPQPANTSLEIGQIAPDFELPRVQGDVRLSDYRGQKPVVLAFTTRIFTEKLFPCFCYPHI  
QELKARYGEIQALGAELLMVTSTDPVQSQIQADLQLPYLLVDPECKTFRLYGVGOALGAPLPAQFVVDREGK  
LRFKHVFSFAQPNADTDEVLRVLRGLQGTGWDGTRRVAPIPF

>JA23-2461

MIEETLRRRFVMARTPSTMLPLGTPAPDFSLPDVVSQGTISLSTFADKPALLVMFICQHCPYVKHVQEELARLGR  
DYKDRGVGIVAISANDVEKYPDDSPENLKKMAETLGFTFPCYDETQEVAKAFTAACPDFFLFDADRKLRYRG  
QLDSDRPSLTDVPVTGKDLRAALDNLLAGKPIDPDQKPSLGCNIKWKPGNEPAYFAG

>JA33-0907

MGLVGLFTALLVSWAGVQPALAQWGTTPLPQIGAPAPEFELPDQSGQVRRRLADFRGKVVVLYFYPRDFTAGC  
TIEARRFQQDLPKFRTLGAIEIVGSADSVDSHRRFCSAEGQLQFLLSDPEGTVSRAYGSWTGEMALRNTFLIDPE  
GILRAIDPIVNSRHSAEVLAQLQELAQAG

>JA33-2145

MALAVGDPAPEFTLPDAEGNLVLSQLRGRVVLYFYPRDNTPGCTREACGFRDAYAEYQAHGIHVLGVSADD  
ARSHQKFAQKLQLPFLLVDEGAKVASAYGVYGPCKFMGKVYNGIHRTTFVIDPEGKIEAIIKVKVEAHAAELLK

QLTGS

>JA33-0672

MVLAVGTVAPGFNTTDTHTGNQVSLADFTGKTVVLYFYPKDDTPGCTKEACGFRDAYADYQSKNVVVLGVSMDDQASHQKFAEKYNLPFLLVDTSGVIARAYDVDGGGYAKRVTVIDAEGKIAKVYQNTTETHARDILADLGL

>JA33-2305

MGIVIGTAAPDFNLPAVGGKIPKGATISLGAYRGKSKVLLAFYPADFSVCTSEMRCFREDWGAFFRAAGCEILGISSDPLSRHEAFAEQLKLEFLLSDVDRKVSQLYGVDSFLGTRRAYFVVDSSQGILRYQHVEWLPFKRDNRELLEAVR  
AVG

>JA33-0537

MSQEGCLRVGQPAPDFSATAVYDMEFKTVRLSDYRGKKYVVLFFYPLDFTFVCPTEITAFSDRYDEFKLDTEILGVSVDSEYSHLAWIQTRKAGGVGELRYPLVSDLKKEISAAYNVLDPAAGVALRGLFIIDKEGIIQHATINNLAFFGRS  
VDETLRTLQAIQYVQAHPDEVCPANWQPGQRTLNPDPVKSKEFFAAVAK

>JA33-2849

MALRLGDTAPNFTQKSTHGEIDFYSWAGDSWVVLFSHPADYTPVCTTELGTVAKLMPEFEKRGVKKVLLSVDDVDSHLGWVKDIEETQNAIVNYPILADVDRKVSQLYGMLDQTNLNQEGLPLTVRSVVIDPNKKIRLILTYPASTGR  
NFDELLRAIDALQLTDKYSVVTAPDWKDGDDVIIPPSLQDPEVLKEKFKPGYKELKPYLRRLTPQPNK

>JA33-1949

MTSNSSLFNRRFFDNFIPQPANSPLQIGELAPDFELPNVHGDPVRLSDYRGQKPVVLAFTTRIFTEKLFPCFCYPHIQELKARYEEIRALGAELLMVTSTDPVQSQQIQADLELPYLLVDPECKTFRLYGVGQALGAPLPGQFIVDREGRL  
RYKHLFSFAEPNASTDEVLRVLRGLASGWDGTRRVAPVPPF

>JA33-2781

MARTPSTMLPLGTPAPDFSLPDVVSQGTISLSTFADKPALLVMFICQHCPYVKHVQEELARIGRDYKDRGVGIVAISANDVEKYPDDSPENLKKMAETLGFTFPCYDESQEVAKAFTAACPDFFLDAERKLVYRGQLDDSRPLSDV  
PVTGKDLRAALDNLGAKPIDPDQKPSLGCNIKWKPGNEPDYFKQA

>7002-A0109

MLQFFRILITVVAIAFMWFPGEAAIALGGPQPELNQLAPEFTLLGNDGEGKIQEFSLQDYRGQWVLYFYPPQDFTPCTLEARRFQDLPKYLERNVQVLGVSVDVDSHEAFCDAEGLKFPLLADSTGDVSKQYGSYLTGYSLRHTY  
LIDPEGILRKIYLVNPAIHSQEVLTDLDSLMASSAQLPPMG

>7002-A1108

MTTLTIGQAAPDFALTNAQGEARTLADYSGKWLVFYFYPKDNTPGCTTEALDFTALVPEFTALNAVIVGVSPDSEKSHGRFIEKKELAIELSDPDHQTAGVYGVWQLKKFMGKEYMGIVRSTFLIDPQGQVAIWSKVVKGHAQTV  
LETLQT

>7002-A0558

MAAQVQLAPDFATATAVIDQEFKTIKLSDYRGQYVVLFFYPLDFTFVCPTEVGAFSDRHGEFQKLNTEVLGVSV  
DSEFAHLAWIQTRKMGVGDALFPLVSDLNKTISTAYGVLEPEAGISLRGLFIIDPEGMIQHITVNNFSFGRSLD  
ETLRVLQAIQHVQTNHNEVCPVDWQVGDRTMVPNPSEAQAYFSTL

>7002-A0320

MSLRLGDVAPNFTQDSTIGEINFYDWAGDSWVVLFSHPADFTVCTTELGEVARLKGEFEKRNKVIASVDDTASHNGWVGDIDETQGCANYPILSDADQKVATLYNMIHPNANPKVTVRTVVIDTERKVRILTITYPPSTGRNFQ  
EILRVLDSLQLTDNYSVATPVNWQDGEDVVVSPAISTEDAKVKFKPGVKEIKPYLRMTPQPNK

>7002-A1383

MARTESTMLPLGAPAPDFALPDVTTGKTVSLGDFRGKAGLLVIFMCRHCPFVIHVQDELARLGVDFVPQDLGIV  
AISANDAENYPDDGPEKLKEMAAALQLNFPIYDESQAIKSYQAACPDFFLFDQDLKLVYRGQLDDARPGND  
KPVTGADLRQAIAAVLAKETPDNPQKPSLGCNIKWKPGNAPSFG

>7002-A0793

MARVPDVVFKTRVRDESVEGPNPYRWEDKTTADIFGGKVVFLSLPGAFTPTCSSNHLPRYEELYSEFQAQGV  
DEIICLSVNDAFVMFKWKGKEIGADKVLLPDGNGEFTRKMGMLVEKSNLGFGMRSWRYSMLVEDGEIKKMF  
VEPDFSDNCPTDPFEVSDADTMLAYIKGESAPGVSEPRKEFVG

>307-1384

MRRQEVLLKLGALPLLALRPRPAAAMGGTLPALDQLAPDFDLESAGQTGALGQRLQRDDFRGSWLVLYFYPRD  
FTSGCTLEARGFQRDLSLYKAANGAVVGVVSADGSDKHASFCTSEGLDFPLLSDPGGEVSKLYGSWIPPFSQRHTF  
VIDPDGVLRRARFVGVNPSIHSQEVLSLTKELQV

>307-0392

MALQIGDPAPDFTLPDQDGGQPVALKDLRGQRVVIYFYPKDDTPGCTKEACNFRDQWDSFKSHGIKVLGISKDN  
AKSHAKFIDKYTLPTLLSDSEPCVAESYGLKKFMGREYMGMMRHTFVIDADGKLEKIYKVKAAATMADD  
ILKDLELAG

>307-1342

MPIAVGDQAPPFKAKDQNGVERCLADLGGKPLVLFYYPKDDTPGCTIEACGFRDQFAALQALGAEVWGVSGD  
GAGSHRRFVSKFQLPYPLLVDENALRDAFGVAKTLFVIPGRVTVYIDGGGVVRLVFDEMLDANAHVRQAMA  
TLQQLKG

>307-1238

MTTGVRVRLQAPDFTATAVVDQEFKDISLSQYRGKYVVLFFYPLDFTFVCPTEITAFSDRYDAFKALNTEVLGVS  
VDSQFSLAWIQTERKQGGLDIAYPLVADLKEIASAYNVLDEAEGVALRGLFIINPEGVVQHATVNNLPVGRN  
VEETLRVLQAFQHVEANPDEVCPANWTPGERTMNPDPVSGSKDFFAAVN

>307-0386

MCHDQKDTLSTVMALQLGDTVNFQDSQQGPINFYDYAGDSWVVLFSHPADYTPVCTTELGAVALKRAEW  
DKRNVKTIALSVDSAESHKGWIGDINETQCTVVDYPILADEDKTVSDLYGMIHPKALNNLTVRSVVIDPAKKLRL  
QITYPASTGRNFDEILRVIDSLQLTDHMQVATPVNWKDGEDCVVPSIPTDEARNKFPKGVTEVRPYLRMTPQP  
NR

>307-2285

MALTASMMLPLGTPLPPFSLPTVEGGTWSTQQLDRRPLLVLFICAHCPYVKHVEASLSAMAQDFSALQMLAIS  
SNSVITHPQDAPEHLLAQLKRCGWDFPYLHDVDQQVARLFQAACPDYPLFDGDQRLIYRGQLDASRPSSGQ  
ASDCADLRTALAAWKAGQPPLLQHPAMGCNIKWQP

>7803-1236

MNRRQLQSGLVAAAAILRPGKTWALGGVAPEIGSSAPDFELAGTNLNDPEKNRWTLSDWSGRWLVLYFYFYP  
RDFTSGCTIEAHGFQDTLTFEQKLNCEITAISADSVEDHESFCNSEDLGFTLLSDHDGVVRSYGSWMAPYSLRH  
TFLIDPSGVVQARWTGVRPVGHAQEVLEALKGLQTS

>7803-1042

MALKTGDAAPFALEDQDGMRRLEDLKGKILVLFYYPKDDTPGCTAEACTFRDQYSDLTALGAEVWGVSGDD  
AVSHRRFAERHQLPFLLSDNTGNLRRSFGVPKTFGLLPARVTVYIDQQGVIQLVFNNLLDGPAAHVKEAEAVVRT  
LAAG

>7803-2172

MTLQIGDPAPDFTLNPEKEELVTLSSLKGQRVVIYFYPKDATPGCTKEACNFRDRWDQFEAHGIRVLGISKDNAA  
SHSRFISKQELPFTLLTDVEPCAVASAYESYGLKKFMGREYMGMMRHTFVVDAAQGNLELIYRKVKAEMADQIL  
NDLGLTAS

>7803-1118

MTANGCLRVGQQAPDFTATAVVDQEFKEISLSQYRGKYVVLFFYPLDFTFVCPTEITAFSDRYADFSSKNTEVLGV  
SVDSQFSLAWIQTPRNQGGLDINYPVADLKEIASAYNVLDDEEGVALRGLFIIDPEGVIMHATINNLPVGR

NVDETLRVLQAFQYVQSHPDEVCPANWTPGEKTMKDPVGSKEFFAAVN

>8102-1280

MRRRDLFIKSGLLLTALSITPTKAWSLGGVVLEQGAEVPSFDLPGSSRREPDRDRWSSDDLGRWLAVYFYPRD  
FTGGCTIEARGFESLHSDFLAAGAEVVGISADSVDDHASFCESEGLSFPLLSDPDGAVSKAYGSWMAPYSLRHTF  
LIDPSGILRQRWVAVRPSGHAQEVLDAITDLQNNTSI

>8102-1015

MAIGVGDLSLPSFCLDDQDGVQRTPETARGRWLVFFYPKDDTPGCTAEACGFRDSSAAFQELGAEVWGISGD  
DAISHRRFATRHLNFPLLVDRNNSLRRSLGVPKALGLVGRVTVVVDGEGVIRHVFSNLLDGAHVREAERVIS  
SLQG

>8102-2162

MALQIGDPAPDFSLPNQDGDVLVQLSSLRGQRVVIYFYPKDDTPGCTKEACNFRDRWDRFEQHGKIVLGISKDN  
ATSHTKFISKHELFPFTLLTDVEPCEVASSYESYGLKKFMGREYMGMMRHTFVVDADGKLERIYLVKKSATMADTI  
LSDLELA

>8102-1213

MTETGCLRVGQQAPDFTATAVVDQEFKEISLSQYRGKYVVLFFYPLDFTFVCPTAITAFSDRYADFSSKNTEVLGV  
SVDSQFSLAWIQTPRNQGGGLDINYPLVADLKEIATAYNVLDAAEGVALRGLFIIDPDGVMHSTINNLVGR  
NVDETLRVLQAFQYVQSNPDEVCPANWTPGEKTMKDPKGSKEYFSAIG

>8102-0221

MALTPSTMLELGTPLPAFSLPVVAGGSISSADLHGRPLLLMVICAHCPFVKHVEPEVSRLEQDYGTAVQLLAVSS  
NSLITHPQDGPQKLADQAKRWGWSFPYLLDEQQSLAKALRAACTPEFYLFADANGLQTLRYGQLDGSRPG  
NDVPLNGVDLRAALDAMLAGQAVNPEQRPSVGCNVKWNPGQEPDWFG

>6803-0221

MTSKKFSWPKTHIALLLTLGLWLGLADLPTYALGGIQPELDQPAPLFTLPSTTGEGEVNLTDIRGQWVVLYFYPQ  
DFTPGCTLEAQRFRDLTKYQALNAQVIGVSVDDLDSHEAFCDAAEGLKFPLLADSDGAVIKTYGSWLSGMALR  
HTYVIDPEGILRERFLGVRPATHSEEVLARLAELQA

>6803-0242

MATALETNQPARTFSAPNAEGKTISSDDFLGQWLVLVLYFYPKDNTPGCTTEAIDFSEKLPEFTDLNAVVGSPDS  
EKSHGKFIDKHNLTVQLLSDPEHELAAAYGAWGPKKFMGKECEGILRSTFLINPQGNIAHIWPNVRVKGHAEKV  
LEKLQQLNSAD

>6803-0755

MTEVLRVGPAPDFTATAIVDQSFQTVKLSTYRGKYLVLFFYPLDFTFVCPTETIAFSDRHSEFTALDTEVVGISVDS  
EFSLAWIQTERKMGGIGNINYPLVSDLKKEISQAYNVLEPDAGIALRGLFIIDREGILQYATVNNLSFGRSVDL  
RVLKAIRHVQSHPNVCPVDWQEGDKTMIPDPEKAKTYFETVAEP

>6803-1198

MALQLGDVVPDFTQESSQGPISEHEWAGDSWVVLFSHPADYTPVCTTELGTVAKLKPEFDKRNKVIKIALSVDD  
VESHKGWICDIDETQNTTVNYPILADGDKKVSPLYGMIHPNALNNLTVRSVFIIDPAKKLRLTFTYPASTGRNFDE  
ILRVIDSLQLTDYHQVATPANWQDGDCKCVVPSISTEDAKVKFKPGVEEIKPYLRTPQPNK

>6803-1159

MNLQIELYKFQQESLKRSSPERAAIFSDFIQGLSEEFNRNRRLLRIGDFAPDFTLKNTKGETIILSEQLKTGPILLKFFR  
GYWCPCYGLELRAYQKVVNKIRALGGTILAISSPQTLVASQKTIDRHDLTYDLLSDSGFQTAQDYGLVFTVPDAVKQ  
IYLQSGCVIPEHNGTEEWLLVPATFVIDRRGHIALAYANVDFRVRYEPEDAIAILLSLFGVGN

>6803-1621

MTPERVPSVVKTRVRDESVPGNPYRWEDKTTEQIFGGKVVVLSLPGAFTPTCSSNHLPRYEQLFEFFQALG  
VDDIICLSVNDAFVMFQWGKQIGADKVKLLPDGNGEFTRKMGMLVEKSNLFGMRSWRYSMFVNDGKIEK

MFIEPEFGDNCPVDPFECSDADTMLAYLKGAEPGVSEPVKAFVG

>BP1-1194

MFLRSVLVALLSILFLSPSAPSWALGGELPPLNAPAPDFSLPSSVNGQLISLKDYRGKWWVLYFYPKDFTSGCTLE  
AQRFRDIEQFHAHNAEVIGVSADSVDSHQDFCDSEGLTFPLSDPDGQVSKAYGSWLGFSVLRHSFIIDPEGIL  
RERYRKNVPAIHSQEVLARLEELQQQG

>BP1-1451

MSLTAGAIAPPFELADATGQLVRLADFQGWVILYFYPDNTPGCTTEACAYRELSATLGDRNVVILGISPDSVTS  
HAKFQQKLDLPPFRLADVDKVAQAYGSYGPCKFMGKEYLGVYRDTFLIDPTGKIAAIYRRVKPAAHVAQVLAD  
LERLQG

>BP1-1198

MALAVGTPAPPFTAKDTQGNTISLSDFAGKTVVLYFYPKDDTPGCTKEACFRDNYAAYQGKNIVVLGVSADDE  
TSHQKFTAKFNLPFLLADVDRSIKAYDVGGGYAKRVTYVIDGNGIISHVYTSVKTDTHATDILADLGL

>BP1-1454

MSECLRVGQPAPDFEAVAVYDQEFKTIKLSDYRGKYVVLFFYPDLDFVCPTEIVAFSDRYDEFKLNTEILGVSVD  
SQFSLAWTQTDRKAGGVGDLKYPLVSDLKKDISTAYNVLTEEGVALRGLFIIDKEGIIQHATINNLAFGRSVDDEL  
RVLQAIQYVQTHPDEVCPAGWHPGDKTMNPDVKSKEYFEAVG

>BP1-2261

MSLKLGDVVPNFTQASSMGNINFYEWAGDSWVVLFSHPADYTPVCTTELGEVARLRPEFEKRNKVLALSVD  
VESHLGWIKDIEEVNNVKVDYPILADEDKKVSTLYDMIHPNSLNNLTVRTVFIIDPQKRLRLTMTYPASTGRNFAE  
ILRVIDSLQLTDNYSVATPANWQEGQECVIVPSLSDEEAKQKFPKGFNAVKPYLRRLTPQPNK

>BP1-1289

MAVQLPFLTSTNFSGLFNERFWQNAWPLPPQNELKRGALVPDVALPGVGLSDRVRLSNEWKKQPLLLVFRIFRIF  
AHQYCPLCYPYLKTLNENHETFQGGVAVLVVTSTDAQQSEKVKADMALKMPLLYDPSCQVFRKYRTGQALGA  
PLPAQFLIDQEGKLHYKHLFSFLEPNAPLERLFQEIDALAQQGATVTAA

>BP1-1788

MARTESTMLALGTVAPDFQLPDVVSQGTSISLSTFADKALLVMFICRHCPYVKHVQQELAKLGRDYKDTGLGIV  
AISANDAANYPEDAPESLKAMATELGFTFPLCYDESQETAKAYTAACTPDDFFLSDRKLVRGQLDDSRPQNGL  
PVTGKDLRAAIDAVLAGQTPSEDQKPSLGCNIKWKPGNEPAYR

>101-2703

MRSRRHFQTFILVICLALITWLNFIIPNAWALGGKPELDQPAPEFTLPTNIGDREISLSDYRGQWVLYFYPKDFT  
SGCTIEARRFQDLPKYRERNTQILGVSADDINSHQFCDSEGLKFPLLADTDGTVSKAYGSWLNFFSMRHTFII  
NPGGILQEIFLGVKPTIHSQEVLSSLDNLQQT

>101-3959

MALSVGTKAPEFTVKDTNGKTVSLSDFAGKTVVMYFYPKDDTPGCTKEAQSFDRDNYAEYQKDMVVLGVSM  
DDEASHKAFTEKYGLPFQLLADVDGAIKAYDVEGGGYPKRVTYIIDAEGNISHVDQNVKTGSHAQDILEVIGKK

>101-3182

MKIQVGDQAPEFTLPSQEGTEVSLSDFRGKKNVLYFYPKDDTPGCKIQACTFRDQYTIFKNVDAEIIIGISGDSK  
QSHKQFSTKYSLPFTLLCDTDNKVRQLYDVPPTLWILPGRATYVIDKEGIIRYICDSTDFEVHSKEALKALRKLRT  
V

>101-0235

MTDECLRVGQKAPDFTATAVVDQEFETIKLSDYRGKYVVLFFYPDLDFVCPTEITAFSD  
RYKEFELLNTEILGVSVDSEFSLAWIQTDRKSGGIGDLNYPLLSDIKKEISTAYNVLDL  
EAGIALRGLFIIDREGIIQHATVNNFAFGRNVDEAIRTLQAIQYVQIHPNEVCPVGWKPG  
DKTMNSDPIKSKEFFAAVS

>101-5038

MTLRLGDKVPDFTQDSSEGQISFYDWAGDSWVVLFSHPADFTPVCTTELGAVARLKPEFDKRGVKVIALSVDD  
AESHKGVVGDINETQKTTVNYPIADVDKVKSDLYDMIHPNSLNNLTIRSVFIIDSEKKLRLFTTYPASTGRNFNEI  
LRVIDSLQLTDNHQVATPVDWKDGDCCVIVPSLKDPEVLKEKFPKGYTEVKPYLRMTPQPNK

>101-0234

MLTSYDFRGLLNQRFFQNLPIPAINDLDNGKRTPDFELPDITNGKLVRLSNYWGVTVPVIVALTRIFTEKQYCPFCF  
PHILALNKNYERFLERGVEVLMITSTDEKQSKIVVNDLSLKMPLLSDSSCQVFKNYKVGQALGAPLSGQFVLDKQ  
GRLCYKHLFSFLDHNASIEDLLGILDNYIFE

>101-3842

MVLTESTMLKLGTIAPNFELPDVVSGNIISPSTFKGKKALLVMFICRHCPFVKHIQLELAKIGKDYVPKDVGIVAISS  
NNIESHPDDAPDKLKEMASELEFNFPYCFDETQEVAKSYIAACTPDDFFLFDVDYKLVYRGQLDDSRPSNEKPVTG  
SDLRAALDTVLAGKNIEEQKPSVGCNIKWKAGNEPSYFG

>101-0162

MVIDKVPDVVFKTRVRDESVDGPNPFRWQDKTTQEIFGGKRVVLFALPGAFTPTCSSTHLPRYEELYNEFKGQG  
IDEIICLSVNDAFVMFQWGKQQGSKNVFLLPDGNGEFSRKMGMMLVEKSNLFGFMRSWRYAMVVNDCTIEK  
MFVEEGFADNYGDDPFEVSDADTVLAFKLGQEAPKDKPARLDFVG

>101-2011

MMILSVNEKTFKKEVLESSQPVLVYFWAPWCGLCKMIVPQLVKFQSEWNCHLKLGVNADKSLKLASTYQLQT  
LPTLILFVNGQIVNRLGYFQAREDFQRTLDAFISTLVKDPSPQPREHRNEKQSILW
